# Supplementary material for: TARIM calcite: a potential reference material for laser ICPMS in situ calcite U–Pb dating
Source: Royal Society of Chemistry journal article supplement (doi:10.1039/d3ja00222e), 2023-01-01
Supplement: d3ja00222e1.pdf [file d3ja00222e1.pdf]

## Table captions

**Table S1.** EPMA measurement results for major elements in TARIM calcite pieces

**Table S2.** LA-ICPMS trace element data of TARIM calcite and quality control standard BCR-2G

**Table S3** U-Pb ID-TIMS isotopic data for TARIM calcite

**Table S4.** Signal intensities, element compositions, and isotope ratios of the TARIM and quality control standard DuffBrown with LA-MC-ICPMS under different laser parameters and different grains

**Table S5.** Signal intensities, element compositions, and isotope ratios of the TARIM and quality control standard LD-5 with LA-Q-ICPMS under different laser parameters and different grains

**Table S6.** LA-MC-ICPMS U-Pb data of reference carbonates as unknowns with TARIM as standard
