# Supplementary material for: TARIM calcite: a potential reference material for laser ICPMS in situ calcite U–Pb dating
Source: Royal Society of Chemistry journal article supplement (doi:10.1039/d3ja00222e), 2023-01-01
Supplement: d3ja00222e3.xlsx [file d3ja00222e3.xlsx]

## Sheet: Table S1
Table S1 EPMA measurement results for major elements in TARIM calcite pieces
Sample spot(wt.%)	CaO	MgO	Al2O3	BaO	SrO	Rb2O	MnO	FeO	Total
TARIM-B 01	56.007	0.116	0	0.018	0.087	0.017	0.016	0.042	56.303
TARIM-B 02	55.591	0.123	0.009	0.116	0.103	0	0.045	0.03	56.017
TARIM-B 03	56.053	0.125	0	0.135	0.095	0	0.005	0	56.413
TARIM-B 04	56.174	0.126	0	0.018	0.033	0	0	0	56.351
TARIM-B 05	56.21	0.105	0.009	0.055	0.064	0.062	0	0	56.505
TARIM-B 06	56.015	0.1	0	0	0.109	0	0	0	56.224
TARIM-B 07	56.289	0.112	0.024	0.043	0.027	0	0.005	0	56.5
TARIM-B 08	56.059	0.121	0	0	0.07	0	0	0.032	56.282
TARIM-B 09	55.747	0.191	0.001	0.079	0.041	0	0.087	0.007	56.153
TARIM-B 10	55.757	0.135	0.001	0.092	0.045	0	0.037	0.082	56.149
Average	55.9902	0.1254	0.0044	0.0556	0.0674	0.0079	0.0195	0.0193	56.2897
RSD (%)	0.802136	40.3144	354.17	173.734	89.4396	499.882	295.415	283.502	0.564206
TARIM-E 01	55.765	0.226	0.011	0	0	0	0	0.018	56.02
TARIM-E 02	55.596	0.166	0	0	0.083	0	0.066	0.005	55.916
TARIM-E 03	55.943	0.148	0.009	0.068	0	0	0.071	0	56.239
TARIM-E 04	55.891	0.213	0.007	0	0.017	0	0	0	56.128
TARIM-E 05	56.061	0.148	0.001	0.068	0.041	0.012	0.024	0.063	56.418
TARIM-E 06	56.424	0.164	0	0	0.029	0	0.063	0	56.68
TARIM-E 07	56.212	0.169	0.012	0	0.052	0	0.042	0.007	56.494
TARIM-E 08	55.752	0.157	0.007	0.067	0.039	0.008	0.008	0	56.038
TARIM-E 09	56.155	0.144	0	0	0	0	0.04	0.037	56.376
TARIM-E 10	56.22	0.139	0.039	0	0.091	0	0	0	56.489
Average	56.0019	0.1674	0.0086	0.0203	0.0352	0.002	0.0314	0.013	56.2798
RSD (%)	0.918955	35.0467	271.473	322.042	187.64	432.049	183.997	326.196	0.887376
TARIM-F 01	55.78	0.13	0.007	0	0.06	0	0	0.012	55.989
TARIM-F 02	55.534	0.148	0.023	0	0.112	0	0.011	0	55.828
TARIM-F 03	55.716	0.125	0.008	0.073	0.118	0	0.032	0.06	56.132
TARIM-F 04	55.32	0.22	0	0.22	0.056	0	0.005	0	55.821
TARIM-F 05	56.098	0.271	0.005	0.061	0.023	0	0.024	0	56.482
TARIM-F 06	56.281	0.165	0.005	0	0.012	0	0	0.007	56.47
TARIM-F 07	55.754	0.16	0.005	0.165	0.112	0	0.003	0	56.199
TARIM-F 08	55.966	0.268	0.013	0	0.043	0.006	0.063	0	56.359
TARIM-F 09	55.684	0.172	0	0	0.033	0	0.024	0	55.913
TARIM-F 10	56.196	0.128	0.009	0	0.176	0	0	0	56.509
Average	55.8329	0.1787	0.0075	0.0519	0.0745	0.0006	0.0162	0.0079	56.1702
RSD (%)	1.07986	61.9221	178.775	308.657	141.014	632.456	249.493	475.046	0.977166
TARIM-G 01	56.039	0.263	0	0	0.004	0	0.037	0	56.343
TARIM-G 02	55.966	0.153	0	0.024	0.043	0.012	0.045	0.002	56.245
TARIM-G 03	55.907	0.149	0.003	0	0.029	0	0.016	0.02	56.124
TARIM-G 04	56.095	0.144	0	0	0	0.027	0	0.017	56.283
TARIM-G 05	56.207	0.223	0.005	0	0.035	0	0	0	56.47
TARIM-G 06	55.878	0.223	0	0	0	0.054	0.034	0.052	56.241
TARIM-G 07	55.982	0.17	0.011	0	0.004	0	0.008	0.01	56.185
TARIM-G 08	56.185	0.211	0	0.098	0	0.021	0.024	0	56.539
TARIM-G 09	55.989	0.238	0	0	0.033	0	0.021	0	56.281
TARIM-G 10	55.62	0.23	0	0	0.054	0	0	0	55.904
Average	55.9868	0.2004	0.0019	0.0122	0.0202	0.0114	0.0185	0.0101	56.2615
RSD (%)	0.601788	42.5196	382.601	509.447	205.354	316.568	178.896	328.505	0.628378
Total Average	55.9529	0.167975	0.0056	0.035	0.049325	0.005475	0.0214	0.012575	56.2503
Tatal RSD (%)	0.860271	51.694	286.344	301.553	162.596	498.454	219.085	323.847	0.744535

## Sheet: Table S2
Table S2 LA-ICPMS trace element data of TARIM calcite and QC standard BCR-2G
Element	Mg24	Mn55	Fe57	Ga71	Rb85	Sr88	Y89	Zr90	Ba137	La139	Ce140	Pr141	Nd146	Sm147	Eu151	Gd157	Tb159	Dy163	Ho165	Er166	Tm169	Yb173	Lu175	Pb208	Th232	U238	Th/U
TARIM-B 01	673.973	55.1751	147.318	0.0108726	0.712462	509.92	13.486	0.0361969	0.195664	0.0714692	0.312996	0.0862493	0.731814	0.586182	0.180926	0.963087	0.143168	1.02391	0.233181	0.716059	0.0898102	0.582484	0.0792768	0.0158538	0.0307202	1.14284	0.0268805
TARIM-B 02	706.581	56.4777	143.423	0.00596062	0.164353	489.839	12.2505	0.0162854	0.128344	0.0661786	0.294295	0.0818764	0.669106	0.533149	0.167024	0.921647	0.133116	0.934423	0.206218	0.657929	0.0826058	0.513669	0.0702204	0.00398691	0.0240942	0.815863	0.0295321
TARIM-B 03	686.64	56.0886	142.479	0.00673278	0.0288743	506.059	13.385	0.00874587	0.150081	0.0734544	0.31135	0.0842669	0.731002	0.578095	0.180545	0.933574	0.13994	0.997066	0.228191	0.723462	0.090591	0.55579	0.0804175	0.00232525	0.0341283	1.08256	0.0315255
TARIM-B 04	644.519	54.2471	141.21	0.00593619	<0.001	503.813	13.2406	0.010371	0.179745	0.0680513	0.324835	0.0826724	0.714101	0.582945	0.186751	0.96895	0.144342	0.973874	0.221861	0.694205	0.0856481	0.554748	0.0749013	0.00362018	0.0292521	0.957595	0.0305474
TARIM-B 05	661.171	55.1778	140.093	0.00819439	<0.001	493.14	13.9183	0.0113014	0.162876	0.0731967	0.334188	0.0887969	0.798185	0.607349	0.190604	0.998193	0.151869	1.04742	0.230177	0.736989	0.0967597	0.591646	0.0812393	0.00687994	0.0311102	1.06285	0.0292706
TARIM-B 06	672.733	56.9159	140.626	0.00594658	<0.001	407.743	11.6508	0.00434643	0.112153	0.0732046	0.342214	0.0952983	0.749604	0.589018	0.186733	0.952619	0.140471	0.910735	0.198935	0.605513	0.0776608	0.46695	0.0653041	0.00135607	0.0285942	0.319013	0.0896335
TARIM-B 07	659.457	52.5536	137.17	0.00598536	<0.001	519.403	14.6351	0.0170298	0.156912	0.0709524	0.305864	0.0837866	0.743005	0.551504	0.183891	1.00512	0.151148	1.08413	0.243111	0.768179	0.0978565	0.607007	0.0834057	0.00575325	0.0354724	1.3663	0.0259624
TARIM-B 08	653.312	51.8442	137.856	0.0038507	<0.001	544.124	14.6995	0.0154627	0.195224	0.0651112	0.295729	0.0852726	0.693874	0.563555	0.184596	0.985001	0.149074	1.05415	0.240074	0.777388	0.0970861	0.623082	0.0821579	0.00257026	0.0294513	1.52511	0.019311
TARIM-B 09	706.234	52.8981	135.811	0.00872126	<0.001	495.518	14.6088	0.0113316	0.145573	0.0726455	0.332463	0.0905833	0.763829	0.612772	0.202139	1.0541	0.155096	1.08499	0.243581	0.772815	0.0955792	0.596593	0.0817736	0.00170762	0.0440848	1.09145	0.0403911
TARIM-B 10	650.631	52.3786	135.47	0.00869631	<0.001	447.902	13.7463	0.0019826	0.144758	0.084957	0.380603	0.0970472	0.890329	0.702544	0.221285	1.09528	0.160988	1.10396	0.233458	0.710129	0.0912727	0.568068	0.0792502	0.00377938	0.0595975	0.556266	0.107139
TARIM-B 11	657.684	53.1383	129.223	0.0129761	0.559774	487.834	12.4004	0.0439162	0.138992	0.0722383	0.322254	0.0863284	0.718785	0.574963	0.186586	0.992769	0.141188	0.988375	0.216459	0.673976	0.0796797	0.512856	0.0703895	0.00430276	0.016224	0.577805	0.0280786
TARIM-B 12	652.99	53.376	128.444	0.00729498	0.175349	491.238	13.2213	0.0191858	0.163297	0.0753189	0.325477	0.0884979	0.741521	0.578977	0.196431	1.00579	0.146151	1.0153	0.227355	0.720662	0.0851825	0.559876	0.0777848	0.00408164	0.0249766	0.870195	0.0287023
TARIM-B 13	661.841	52.3741	127.284	0.0082614	0.0486328	453.018	13.3555	0.004897	0.135528	0.073942	0.339086	0.0947819	0.799651	0.661115	0.203099	1.07517	0.155395	1.05023	0.232368	0.71643	0.0859051	0.572622	0.077018	0.00505985	0.053957	0.632135	0.0853568
TARIM-B 14	655.218	51.5404	126.07	0.00998717	0.0158484	506.742	13.0014	0.0202771	0.118514	0.0595512	0.294139	0.0832964	0.694937	0.544214	0.176781	0.949444	0.13766	0.97018	0.223436	0.665479	0.0850568	0.530391	0.0769667	0.00128067	0.0250214	0.813113	0.0307723
TARIM-B 15	656.587	52.6444	124.976	0.00883138	-0.00491913	530.764	14.0832	0.0152669	0.161945	0.0618823	0.277541	0.0750706	0.638664	0.530409	0.173184	0.92506	0.141726	1.00258	0.2305	0.74728	0.0928375	0.577639	0.0832583	0.00173248	0.0248789	1.36031	0.0182892
TARIM-B 16	652.415	53.9687	123.623	0.00580858	<0.001	475.497	12.4772	0.0122016	0.131199	0.0663609	0.313263	0.0839426	0.71133	0.559961	0.183688	0.969019	0.140673	0.948967	0.208528	0.661559	0.0811072	0.511604	0.0724869	0.000212932	0.0196376	0.625418	0.0313991
TARIM-B 17	631.816	56.9055	122.825	0.00995501	<0.001	431.246	14.4942	0.0108474	0.135718	0.0850507	0.394225	0.104446	0.896129	0.715858	0.212949	1.10379	0.167883	1.12174	0.246416	0.765064	0.0970864	0.616263	0.0898746	0.00691859	0.0322605	0.940378	0.0343058
TARIM-B 18	692.796	83.6916	122.343	0.00898302	<0.001	389.365	11.605	0.00842952	0.114414	0.0909716	0.395903	0.106124	0.869348	0.612535	0.192601	0.961192	0.14058	0.930311	0.199567	0.603115	0.0764649	0.48903	0.0655092	0.0015511	0.0166848	0.407077	0.0409868
TARIM-B 19	697.218	94.4291	120.847	0.00916422	<0.001	493.137	12.0694	0.0236116	0.143977	0.0643094	0.347201	0.0893031	0.766396	0.519712	0.158703	0.836475	0.126595	0.879215	0.203611	0.65879	0.0829124	0.52332	0.0773206	0.00269526	0.017589	1.14066	0.01542
TARIM-B 20	619.959	81.9813	119.247	0.00952456	<0.001	476.408	12.3383	0.0214262	0.141657	0.0750559	0.354255	0.0894563	0.760139	0.505231	0.149085	0.808456	0.120854	0.860356	0.204461	0.651373	0.0809061	0.510827	0.074294	0.000480398	0.0106948	1.12633	0.00949528
TARIM-B mean	664.689	58.8903	132.317	0.00808416	0.212547	482.636	13.2333	0.0156556	0.147829	0.0721951	0.329894	0.0888549	0.754087	0.585504	0.18588	0.975237	0.144396	0.999095	0.223574	0.70132	0.0876004	0.553223	0.0771425	0.00380741	0.0294215	0.920663	0.0319568
TARIM-E 01	1047.58	77.6806	434.24	0.00334287	1.75824	335.682	4.41689	0.0582742	0.0576935	0.034892	0.121312	0.0330933	0.306712	0.240759	0.0780889	0.384926	0.0515052	0.365995	0.078635	0.238175	0.0271323	0.168046	0.0244643	0.00410503	0.00181565	0.465846	0.00389754
TARIM-E 02	1217.61	95.5266	428.546	0.00301975	1.02466	215.092	3.19507	0.02077	0.0185363	0.0144639	0.0656159	0.0226363	0.238624	0.206496	0.0554809	0.3119	0.0386115	0.256621	0.0563243	0.180795	0.0187969	0.12456	0.0179693	0.000309361	0.00099809	0.319878	0.00312022
TARIM-E 03	1112.35	81.2699	410.039	0.000911944	0.427301	366.136	5.21282	0.0553325	0.078769	0.0390544	0.129733	0.0348621	0.310208	0.25266	0.0718098	0.392862	0.0591259	0.415596	0.0860125	0.258915	0.0308384	0.179583	0.0256375	0.000814018	0.000753233	0.260035	0.00289667
TARIM-E 04	1090.78	80.1654	397.702	0.00293195	0.172701	381.26	5.25842	0.0455466	0.0888514	0.0438458	0.132316	0.0357864	0.327398	0.241033	0.07814	0.421492	0.0592573	0.41582	0.0872668	0.266041	0.0305122	0.180256	0.0260482	0.00213012	0.00169259	0.307097	0.00551158
TARIM-E 05	1085.35	80.5611	383.381	0.00202896	0.0366826	390.362	5.18472	0.0418116	0.0975694	0.0375225	0.119744	0.034085	0.315339	0.22855	0.0731366	0.416693	0.0570419	0.385866	0.0865538	0.260399	0.0315803	0.178405	0.0244156	0.000744796	0.00231249	0.430002	0.00537785
TARIM-E 06	1060.84	78.2804	372.75	0.00226819	<0.001	441.47	6.04472	0.0428039	0.10666	0.0411558	0.131721	0.0337773	0.300187	0.24313	0.0802331	0.46397	0.0645933	0.465461	0.100167	0.299757	0.0344509	0.194352	0.0280018	-0.000240397	0.00212886	0.522542	0.00407405
TARIM-E 07	971.434	70.0874	357.921	0.00346696	<0.001	524.89	6.87256	0.0643012	0.1464	0.0492811	0.157279	0.0398701	0.329147	0.24683	0.0880221	0.489488	0.0694751	0.492121	0.106745	0.332619	0.0400651	0.232206	0.0307539	-0.000224955	0.00078822	0.264967	0.00297478
TARIM-E 08	890.267	63.1166	346.102	0.00235425	<0.001	631.827	8.20488	0.0781106	0.230173	0.0640773	0.185986	0.0457252	0.375317	0.316253	0.102434	0.577423	0.0819004	0.589028	0.128634	0.392696	0.0453413	0.275051	0.0339038	0.000693695	0.00113864	0.193342	0.00588927
TARIM-E 09	950.428	68.1961	335.645	0.00157173	<0.001	554.647	7.25052	0.0581046	0.165287	0.0502241	0.158461	0.044025	0.344373	0.252466	0.087781	0.534191	0.0740516	0.513734	0.113819	0.350767	0.040656	0.234417	0.0305428	0.000736601	0.000649989	0.264321	0.00245909
TARIM-E 10	897.004	63.9285	329.923	0.00193976	<0.001	643.615	8.17387	0.0642311	0.244489	0.0563961	0.174649	0.0431589	0.351788	0.307208	0.0991137	0.56504	0.0819435	0.57057	0.122581	0.385592	0.0423138	0.247632	0.0334175	0.0025173	0.000454901	0.171682	0.00264968
TARIM-E 11	1053.49	77.9038	296.01	0.00493359	0.892872	384.373	5.01455	0.0480875	0.0721113	0.0346589	0.117771	0.0332231	0.284071	0.236941	0.0697448	0.407789	0.056879	0.374923	0.0841406	0.258052	0.0296401	0.177217	0.0250943	0.000837442	0.000967057	0.396666	0.00243796
TARIM-E 12	1101.19	83.6802	289.101	0.000789217	0.189516	332.303	4.40813	0.0298761	0.0459521	0.0270714	0.0968122	0.0261195	0.248924	0.211737	0.0646613	0.354287	0.0501527	0.345176	0.0723224	0.228565	0.0264357	0.141006	0.0217211	0.000393991	0.000969144	0.389591	0.00248759
TARIM-E 13	1050.77	76.6541	277.244	0.00279224	0.0195916	403.362	5.3856	0.0546895	0.0796996	0.0382132	0.127203	0.0341208	0.276417	0.228635	0.0738875	0.405258	0.0585971	0.366972	0.0877104	0.260115	0.028813	0.17445	0.025365	0.000856494	0.00025471	0.226105	0.00112651
TARIM-E 14	1009.07	72.2369	273.183	0.00298514	<0.001	451.732	5.75014	0.0541759	0.119204	0.0415749	0.128711	0.0320087	0.279721	0.235793	0.0729656	0.435189	0.059592	0.410708	0.0949928	0.279711	0.0331198	0.185222	0.0225786	0.000801843	0.000429044	0.201796	0.00212613
TARIM-E 15	1133.36	86.7661	267.872	0.00239868	<0.001	327.73	4.60811	0.0283468	0.0532197	0.0263664	0.09541	0.0273335	0.244878	0.209113	0.0640766	0.360965	0.049385	0.341099	0.0726317	0.243208	0.0269211	0.153222	0.0243034	0.000497561	0.00176551	0.411339	0.00429209
TARIM-E 16	1224.45	91.887	259.523	5.46757e-05	<0.001	266.998	2.92788	0.0149069	0.0419082	0.0170087	0.060589	0.0181326	0.148317	0.10935	0.0379242	0.213091	0.0299363	0.231586	0.0473493	0.149905	0.0178444	0.121872	0.0160513	-0.00057626	-8.88263e-06	0.177341	-5.00877e-05
TARIM-E 17	1128.67	85.6336	253.363	0.00183876	<0.001	296.222	4.21251	0.0401287	0.0286842	0.0335653	0.113238	0.0300154	0.296392	0.219268	0.0616786	0.356593	0.0503908	0.314054	0.0718147	0.212543	0.024124	0.146915	0.0234306	-0.00098978	0.000481698	0.28021	0.00171906
TARIM-E 18	1145.79	85.7987	245.928	0.000736095	<0.001	337.833	4.86015	0.0337359	0.0679703	0.0319677	0.0992646	0.0290137	0.251668	0.214	0.0681091	0.368339	0.0513661	0.35085	0.0821227	0.233209	0.0299856	0.167537	0.022414	1.62834e-05	0.000792107	0.300355	0.00263724
TARIM-E 19	1227.89	90.7094	242.849	0.0002684	<0.001	288.554	3.14912	0.0156079	0.0530432	0.0195632	0.0633689	0.0159344	0.150634	0.121499	0.0376838	0.224704	0.0319235	0.215699	0.0529761	0.161261	0.0208067	0.110908	0.0168455	-0.00121048	-9.73913e-05	0.164653	-0.000591494
TARIM-E 20	1224.79	90.5432	233.58	-0.000461753	<0.001	298.993	3.5605	0.0169743	0.0540159	0.0219573	0.0663703	0.0196076	0.158868	0.12957	0.0402369	0.236203	0.0365593	0.249964	0.0583026	0.177128	0.0195667	0.126018	0.0174374	-0.000834467	0.000148384	0.167252	0.000887187
TARIM-E mean	1081.16	80.0313	321.745	0.00200857	0.565195	393.654	5.18456	0.0432908	0.0925118	0.036143	0.117278	0.0316264	0.276949	0.222565	0.0702605	0.39602	0.0556144	0.383592	0.0845551	0.258473	0.0299472	0.175944	0.0245198	0.00056891	0.000921702	0.295751	0.00311648
TARIM-F 01	1609.44	107.347	218.616	0.00332593	0.833777	140.471	0.410642	0.0106952	0.027889	0.00147668	0.00601349	0.000833378	0.00845285	0.00701336	0.0044539	0.0263932	0.00390759	0.0297496	0.00900675	0.0290673	0.00320767	0.0159411	0.00240299	0.0223551	0.0032064	0.0355428	0.0902122
TARIM-F 02	1614.65	102.925	213.728	-0.000448484	0.147176	161.951	0.59121	0.0015095	0.0167498	0.00292454	0.00941718	0.00160049	0.0180299	0.0121751	0.00346077	0.0339591	0.00557775	0.0481287	0.0133557	0.0415585	0.0049001	0.0252898	0.00426002	0.00889156	0.00570932	0.0381036	0.149837
TARIM-F 03	700.912	65.4594	210.001	0.0123947	-0.00468029	865.277	29.7237	0.0334356	0.157304	0.271143	0.715903	0.171052	1.44118	1.00896	0.324561	1.86697	0.284133	2.15003	0.508829	1.60229	0.183278	0.890804	0.109444	0.0105415	0.0144449	0.139808	0.10332
TARIM-F 04	844.068	65.3663	207.127	0.00446349	<0.001	680.62	9.32152	0.0646994	0.213746	0.0503056	0.156603	0.0408933	0.353956	0.2885	0.0986958	0.60542	0.0839832	0.615098	0.144528	0.440523	0.0499366	0.312704	0.0409544	0.00448279	0.0303151	0.535121	0.056651
TARIM-F 05	1463.66	106.904	203.862	0.000229906	<0.001	254.012	4.09136	0.027114	0.0702936	0.0114341	0.0371562	0.0107029	0.114375	0.121587	0.0434614	0.279554	0.0420936	0.288686	0.0671565	0.214152	0.0275493	0.160692	0.0265755	0.00608824	0.0613473	0.549017	0.11174
TARIM-F 06	810.356	62.4362	200.567	0.00326078	<0.001	693.058	8.49221	0.0939973	0.226031	0.0532254	0.166046	0.041907	0.359396	0.278252	0.0921868	0.573756	0.0783761	0.570895	0.126455	0.389633	0.0437894	0.281371	0.0357079	0.00318949	0.0161611	0.271547	0.0595149
TARIM-F 07	918.292	71.3105	196.899	0.00247534	<0.001	652.727	8.33701	0.0553847	0.238061	0.0431097	0.144309	0.0367514	0.351749	0.280434	0.0925903	0.545987	0.0799032	0.58192	0.135102	0.394813	0.0469373	0.253277	0.0354949	0.00269094	0.0209685	0.261837	0.0800823
TARIM-F 08	1608.27	111.659	193.062	-0.000874396	<0.001	137.024	1.27019	-0.00367237	0.000984522	0.0013047	0.0039807	0.001747	0.0100156	0.0187514	0.00814266	0.0709198	0.0116467	0.0993698	0.0252689	0.0737884	0.00574048	0.0331008	0.00564941	0.00220647	0.0144274	0.158969	0.0907561
TARIM-F 09	1281.91	110.395	189.584	-0.00101758	<0.001	172.678	6.20559	0.0377967	0.0108669	0.0133819	0.0359131	0.0111138	0.124535	0.146118	0.0598888	0.429213	0.0611383	0.424818	0.108007	0.355393	0.0494243	0.322011	0.0608403	0.00522307	0.0273382	0.421884	0.0648003
TARIM-F 10	1373.75	88.8692	184.808	-0.000195687	<0.001	229.929	2.6005	0.00940821	0.0480422	0.0157348	0.0469105	0.0109502	0.100994	0.0858697	0.0274243	0.1747	0.0268532	0.195874	0.046281	0.140134	0.0169807	0.113115	0.015206	0.000716907	0.0263162	0.211517	0.124417
TARIM-F 11	1429.87	88.1106	174.069	0.00247297	0.758065	176.038	1.28772	0.00969118	0.0427228	0.0089884	0.0259514	0.00776839	0.0493567	0.0441364	0.0123061	0.0746226	0.0143042	0.0998872	0.0266547	0.0848393	0.0103392	0.0536103	0.00591938	0.007585	0.0188391	0.0769825	0.24472
TARIM-F 12	1483.77	94.6688	172.531	0.00100273	0.120483	167.245	1.38417	0.00144521	0.0113515	0.00720045	0.0203165	0.0045338	0.0445524	0.0307703	0.0128796	0.0719031	0.0139923	0.114009	0.0289625	0.0959145	0.0107742	0.0573487	0.00887424	-0.000283298	0.0110952	0.076638	0.144774
TARIM-F 13	931.119	66.7909	171.367	0.00123957	-0.00226523	593.646	8.42763	0.103435	0.185283	0.0741872	0.203334	0.0505306	0.399305	0.301416	0.0987287	0.591538	0.082531	0.588048	0.133867	0.400069	0.0466272	0.26433	0.0360408	-6.59108e-05	0.0361903	0.395795	0.0914371
TARIM-F 14	683.98	63.3334	168.652	0.0062912	<0.001	856.698	13.728	0.0508781	0.244609	0.127133	0.360736	0.0907288	0.713328	0.523971	0.162026	0.869353	0.136643	1.01398	0.23377	0.720366	0.0834107	0.440345	0.0569281	0.00871642	0.0291519	0.335033	0.0870121
TARIM-F 15	816.515	62.8097	165.614	0.0023146	<0.001	671.768	9.16439	0.0717666	0.279522	0.0568098	0.163412	0.0456321	0.370634	0.29	0.0955753	0.577086	0.0874902	0.612094	0.141097	0.446584	0.0532017	0.291933	0.042126	0.0077582	0.02917	0.464876	0.0627478
TARIM-F 16	899.085	65.0663	164.273	0.00510018	<0.001	666.387	9.32829	0.0844137	0.230656	0.0604236	0.187531	0.0474337	0.411191	0.335523	0.1122	0.566563	0.0903166	0.639177	0.139908	0.447691	0.0528431	0.297366	0.0386978	0.00444115	0.0201084	0.218904	0.0918595
TARIM-F 17	1562.41	98.5641	161.588	-0.00131501	<0.001	155.39	0.632515	-0.00379798	0.0669599	0.00308527	0.00963979	0.00177797	0.024833	0.0155765	0.00670095	0.037549	0.00584338	0.0456249	0.0124471	0.0420148	0.00418161	0.0304179	0.00361642	0.00180844	0.00623346	0.0298485	0.208837
TARIM-F 18	1590.65	101.895	159.601	0.000647551	<0.001	150.739	0.594219	-0.00178469	-0.00361185	0.00259627	0.00831751	0.00213433	0.0178	0.0167254	0.0039931	0.0352415	0.00587244	0.0501324	0.0125598	0.0388875	0.00329245	0.0225053	0.00365066	0.0002148	0.00495382	0.0311315	0.159126
TARIM-F 19	879.126	62.9257	157.014	0.00241733	<0.001	640.901	8.59899	0.0925395	0.182068	0.0560626	0.16474	0.0434894	0.3578	0.307072	0.09842	0.56447	0.0810763	0.5864	0.129785	0.406277	0.0489419	0.276577	0.0342442	0.238657	0.0291717	0.377963	0.0771813
TARIM-F 20	788.434	61.5607	153.885	0.00397103	<0.001	677.509	8.33616	0.0794354	0.257514	0.0575789	0.169556	0.0429342	0.368017	0.278761	0.0967884	0.543793	0.0785774	0.58194	0.127908	0.39133	0.0450932	0.24538	0.0324839	0.00142008	0.0174103	0.196344	0.0886723
TARIM-F mean	1164.51	82.9198	183.342	0.00238781	0.308759	437.203	6.6263	0.0409195	0.125352	0.0459053	0.131789	0.0332257	0.281975	0.219581	0.0727242	0.42695	0.063713	0.466793	0.108547	0.337766	0.0395224	0.219406	0.0299558	0.0168319	0.0211279	0.241343	0.0875432
TARIM-G 01	757.78	55.0277	115.173	0.00659271	0.332723	462.043	9.98232	0.0475469	0.140428	0.0589936	0.211591	0.0580776	0.493844	0.412264	0.132897	0.736309	0.110339	0.781096	0.173443	0.503667	0.0594069	0.34381	0.0477067	0.0181543	0.0551939	0.544809	0.101309
TARIM-G 02	1168.05	110.477	113.311	0.00175952	0.120041	123.561	0.230738	0.00487972	0.01167	0.000218433	0.00146483	0.000236877	0.00159721	0.00444961	0.00202882	0.0140258	0.00147917	0.0150694	0.00379806	0.0120987	0.000922914	0.0106838	0.00113279	0.00377634	0.00237898	0.0820223	0.0290041
TARIM-G 03	1049.54	97.5436	113.705	-0.000288431	0.0571025	168.881	1.2759	0.00644612	0.0313354	0.0032298	0.0141751	0.0039372	0.0374981	0.04563	0.0143746	0.0894544	0.0128749	0.0925103	0.0183777	0.058449	0.00685851	0.0410357	0.00484074	0.00508464	0.0147347	0.206299	0.0714242
TARIM-G 04	1333.59	113.297	112.989	-0.000161363	0.0338833	127.858	0.959323	0.000748061	0.00390061	0.000189444	0.00252289	0.000749982	0.0140512	0.0212142	0.00658613	0.0585914	0.0107432	0.0682724	0.0162719	0.0440039	0.00483706	0.0273189	0.00444161	0.00196821	0.00838242	0.25298	0.0331347
TARIM-G 05	1366.52	116.905	110.773	-0.000715325	0.0171043	153.435	0.422582	-0.000558712	0.00506856	0.000179707	0.000802971	3.28251e-05	0.00179183	0.00472456	0.00309504	0.0291322	0.00457204	0.0359157	0.00778849	0.0199603	0.00274845	0.0131238	0.00268985	0.00392625	0.00810232	0.261553	0.0309777
TARIM-G 06	1146.22	85.839	111.93	0.00023453	0.0184929	184.309	1.10739	-0.000143405	0.0557743	0.00904967	0.024814	0.00519672	0.0459813	0.0295855	0.0102424	0.0653321	0.0106393	0.0749835	0.0189439	0.0634523	0.00802776	0.0387672	0.00437439	0.00479488	0.00278591	0.0353033	0.0789137
TARIM-G 07	753.05	74.0002	109.277	0.00971158	<0.001	1026.63	10.8986	0.0145438	0.043361	0.191774	0.429951	0.0958459	0.772303	0.438825	0.126455	0.70909	0.099764	0.751481	0.181031	0.578062	0.0603381	0.300774	0.0398695	-0.000157597	0.0193667	0.255286	0.0758629
TARIM-G 08	800.336	68.0207	109.027	0.00214422	<0.001	436.059	4.52283	0.0623557	0.0938229	0.0278239	0.0905595	0.0209312	0.204112	0.168874	0.0509849	0.289759	0.0441729	0.302227	0.0688822	0.205921	0.0236172	0.126988	0.0174997	0.00140721	0.0306077	0.495012	0.0618322
TARIM-G 09	980.582	89.0508	109.609	0.00134421	<0.001	211.284	1.98564	0.0111189	0.0391912	0.00912774	0.0273639	0.00914368	0.0751613	0.0787038	0.0240781	0.143323	0.0184926	0.147005	0.0309516	0.106093	0.0112701	0.0628581	0.0087332	0.00251882	0.0166817	0.299723	0.0556571
TARIM-G 10	947.541	83.0313	109	5.3072e-05	<0.001	188.19	2.12048	0.00591114	0.0186554	0.00999664	0.0312718	0.00901933	0.0899851	0.0684527	0.0259267	0.140929	0.0211404	0.150203	0.0340781	0.113164	0.0129445	0.074187	0.0104277	0.000378442	0.0247574	0.341212	0.0725573
TARIM-G 11	672.962	56.8569	105.811	0.00425206	0.126729	600.455	7.79337	0.117683	0.20072	0.0456743	0.151674	0.0386373	0.322792	0.264652	0.0889055	0.517812	0.0758502	0.53283	0.12332	0.382668	0.0420255	0.225297	0.0318065	0.00401665	0.024485	0.429814	0.0569665
TARIM-G 12	675.643	59.4684	105.285	0.00594979	0.0691776	620.335	9.08446	0.0754036	0.217857	0.048301	0.154212	0.0417556	0.356309	0.268821	0.0934397	0.543663	0.0832075	0.612754	0.14269	0.4415	0.048019	0.309508	0.0385383	0.00551403	0.031226	0.634536	0.0492107
TARIM-G 13	671.613	58.1349	106.334	0.00351343	0.0407417	603.058	8.25172	0.0768137	0.190256	0.0483765	0.146181	0.041362	0.347943	0.280227	0.0926888	0.557881	0.0778082	0.584705	0.127301	0.394726	0.0468074	0.264566	0.0351692	0.000956991	0.0294957	0.914705	0.0322462
TARIM-G 14	887.827	68.8524	104.415	0.00244828	0.0458644	498.887	8.12718	0.0619159	0.11896	0.0433014	0.143481	0.0386155	0.32158	0.289612	0.0932417	0.53802	0.0744789	0.5691	0.125767	0.39185	0.042734	0.25253	0.0330522	0.00365495	0.0294748	0.770027	0.0382777
TARIM-G 15	690.9	59.6013	102.586	0.00266727	0.0185703	583.366	7.78267	0.0767589	0.199735	0.0441224	0.146472	0.0364648	0.322248	0.267059	0.0867495	0.523841	0.0751183	0.528303	0.121226	0.378744	0.0424994	0.241856	0.0340884	0.00254872	0.0257017	0.628482	0.0408948
TARIM-G 16	719.182	57.3612	105.513	0.00306573	0.0231475	589.606	7.21111	0.0996725	0.180151	0.0460592	0.140182	0.0365112	0.308088	0.237746	0.07759	0.481338	0.0699757	0.477106	0.110064	0.332297	0.038499	0.205667	0.0260059	0.000372895	0.00619006	0.37614	0.0164568
TARIM-G 17	771.695	66.3692	104.039	0.00199792	0.0149299	517.347	6.68549	0.0668646	0.155091	0.0397443	0.126313	0.0319532	0.297508	0.249254	0.0807143	0.461303	0.0628157	0.452138	0.102609	0.318239	0.0363707	0.205871	0.0287836	5.69589e-06	0.016195	0.498301	0.0325004
TARIM-G 18	648.683	56.7362	104.068	0.000831898	0.0165486	599.386	7.55252	0.0844804	0.192248	0.0458932	0.145416	0.0384487	0.334397	0.269474	0.0893244	0.502166	0.0718373	0.515933	0.119612	0.349867	0.041735	0.226969	0.0313966	0.00223848	0.0254126	0.416342	0.0610377
TARIM-G 19	770.16	65.3907	103.995	0.00298075	0.0140609	506.732	6.47105	0.0738568	0.149007	0.039784	0.127173	0.0330841	0.287561	0.227241	0.0734742	0.433215	0.0627152	0.451327	0.0981013	0.30106	0.0362799	0.200915	0.0277444	0.00495737	0.062287	0.878348	0.0709138
TARIM-G 20	660.98	60.9058	102.663	0.0023983	-0.000139775	633.197	9.23596	0.046472	0.202455	0.0464932	0.143375	0.036794	0.333791	0.271682	0.0934371	0.548811	0.0818855	0.597671	0.137803	0.435157	0.0512103	0.285127	0.0364281	0.000309795	0.0405374	1.13913	0.0355862
TARIM-G mean	873.642	75.1434	107.975	0.00253901	0.059311	441.731	5.58507	0.0466385	0.112484	0.0379166	0.11295	0.0288399	0.248427	0.194925	0.0633117	0.3692	0.0534955	0.387032	0.0881029	0.271549	0.0308576	0.172893	0.0232365	0.00332135	0.0236998	0.473001	0.0501052
All TARIM mean	946	74.2462	186.345	0.00375489	0.242126	438.806	7.65732	0.0366261	0.119544	0.04804	0.172978	0.0456367	0.39036	0.305644	0.0980441	0.541851	0.0793047	0.559128	0.126195	0.392277	0.0469819	0.280366	0.0387136	0.00613239	0.0187927	0.48269	0.0501679
BCR-2G 01	20352	1583	87654	21.2	50.1	335	36.7	176	689	24.3	50.9	6.25	26.7	6.82	1.95	6.87	1.132	6.42	1.28	3.74	0.390945	3.33	0.4	10.99	6.012	1.75
BCR-2G 02	20382.4	1632.01	89935.3	23.5286	53.0736	362.31	35.1931	187.153	719.575	25.2266	52.6484	6.83624	28.9165	6.75049	1.98961	7.03623	1.07036	6.65679	1.33477	3.9774	0.555102	3.48021	0.58726	11.4262	6.05986	1.92749
BCR-2G 03	21148.4	1667.46	94004.6	23.6377	53.384	368.512	35.5436	190.99	722.06	25.322	52.9694	6.83634	29.2954	6.81449	2.02142	6.90723	1.06061	6.82514	1.34906	4.0743	0.556876	3.54514	0.536351	11.3143	6.04442	1.81664
BCR-2G 04	21074.2	1668.2	95893.4	24.5027	55.0732	365.599	35.4631	187.535	727.308	25.6452	53.5782	7.19685	29.5009	7.16983	2.38323	7.05226	1.44453	7.10002	1.62903	4.22301	0.779401	3.87087	0.987586	12.2992	6.28805	2.14159
BCR-2G 05	20331.7	1609.47	94527.7	23.3184	52.4016	354.816	34.316	184.269	703.119	24.7954	51.7822	6.81056	28.5009	6.79669	2.05386	6.76474	1.13833	6.6456	1.41122	3.94868	0.663793	3.56877	0.614028	11.4827	5.91412	1.85012
BCR-2G 06	19438.8	1544.38	92697.4	22.5344	49.7719	339.798	32.8873	176.313	675.417	23.7654	49.8012	6.50103	27.4658	6.53051	1.9665	6.5547	1.0825	6.3947	1.36347	3.82272	0.575344	3.40951	0.568601	11.0121	5.78495	1.84726
BCR-2G 07	18448.9	1469.48	89738	20.9599	46.6026	326.68	31.3681	169.298	649.892	22.7782	47.6226	6.11438	26.1911	6.09977	1.76815	6.18009	0.926173	6.05505	1.19327	3.55457	0.464944	3.07037	0.460723	10.2767	5.47745	1.61009
BCR-2G 08	17741.7	1400.4	87591.9	19.9954	44.5381	312.097	30.0189	162.077	623.045	21.9698	45.919	5.93368	25.1842	5.87183	1.74385	5.8912	0.92332	5.87498	1.16755	3.42687	0.490071	3.07455	0.471056	9.99608	5.35543	1.63623
BCR-2G mean	19864.8	1571.8	91505.3	22.4596	50.6181	345.601	33.9362	179.204	688.677	24.2253	50.6526	6.55989	27.7193	6.6067	1.98458	6.65705	1.09723	6.49654	1.34105	3.84595	0.55956	3.41868	0.578201	11.0997	5.86703	1.82243
BCR-2G ref. values	19800	1492	96444.4	23	47	342	35	184	683	24.7	53.3	6.7	28.9	6.59	1.97	6.71	1.02	6.44	1.27	3.7	0.51	3.39	0.531	11	5.9	1.69
Deavation (%)	0.32712	5.34845	-5.12125	-2.34948	7.69815	1.05305	-3.03932	-2.60631	0.831174	-1.92173	-4.96693	-2.09127	-4.08532	0.25345	0.739943	-0.789046	7.57135	0.877887	5.59428	3.94447	9.71755	0.84594	8.88901	0.906033	-0.558747	7.83587

## Sheet: PlotDat14
Source sheet	Table S2	67.4259	0.2668	0.798759	1	15.6212	0.0547005	0	0.736345	69.8088	0.2668	64.3807	0.3109	53.9922	0.3671	68.952	0.282	67.7515	0.2874	54.9294	0.3706	52.6019	0.385	55.4856	0.3705	72.0297	0.261	46.1422	0.4394	58.6344	0.3445	6.24921	0.7003	57.7689	0.355	18.2121	0.6281	57.1519	0.3864	16.1449	0.642	60.906	0.3396	12.1127	0.0283699	55.5189	0.3837	4.60107	0.72308
Plot name	Concordia14	62.6474	0.3109	0.819419	0.934605	7.56836	0.0657994	104.897	0	69.7123	0.268836	64.3105	0.311837	53.9291	0.368451	68.8788	0.283005	67.6541	0.289781	54.8596	0.372123	52.5429	0.386695	55.3781	0.373744	71.9471	0.262038	46.0705	0.441612	58.5712	0.345678	6.23169	0.701802	57.7088	0.35611	18.1899	0.628693	57.0773	0.38862	16.1178	0.642709	60.8273	0.341098	4.58996	0.148485	55.4484	0.385509	4.59509	0.7236
Plot Type	1	52.4354	0.3671	0.86054	0.827945	4.88752	0.0801223			69.4305	0.270708	64.1056	0.312698	53.745	0.369692	68.6649	0.283928	67.3696	0.29197	54.6558	0.373522	52.3707	0.388252	55.0641	0.376725	71.7059	0.262993	45.8614	0.443645	58.3866	0.346761	6.18056	0.703183	57.5332	0.35713	18.1249	0.629237	56.8597	0.39066	16.0387	0.64336	60.5977	0.342474	4.32162	0.159986	55.2424	0.387171	4.57764	0.724077
1st free col	45	67.1436	0.282	0.90475	0.734131	3.54967	0.0987156			68.9864	0.272263	63.7825	0.313414	53.4548	0.370723	68.3279	0.284695	66.9212	0.293788	54.3345	0.374684	52.0992	0.389546	54.5691	0.379201	71.3258	0.263785	45.5316	0.445334	58.0958	0.347661	6.09997	0.70433	57.2564	0.357978	18.0225	0.62969	56.5166	0.392354	15.9141	0.643901	60.2356	0.343617	3.55902	0.224044	54.9178	0.388552	4.55013	0.724474
Sigma Level	2	65.3458	0.2874	0.952394	0.651574	2.74902	0.122987			68.4158	0.273375	63.3675	0.313926	53.0821	0.371461	67.8949	0.285244	66.3452	0.295088	53.9218	0.375516	51.7505	0.390472	53.9333	0.380973	70.8374	0.264352	45.1081	0.446542	57.7221	0.348305	5.99643	0.70515	56.9009	0.358584	17.8909	0.630014	56.0759	0.393567	15.7539	0.644288	59.7705	0.344435	3.07025	0.350821	54.5009	0.38954	4.51479	0.724758
Absolute Errs	TRUE	53.2058	0.3706	1.00387	0.578886	2.21696	0.154833			67.765	0.273955	62.8941	0.314192	52.6569	0.371845	67.401	0.28553	65.6882	0.295766	53.4511	0.375949	51.3527	0.390954	53.2081	0.381896	70.2804	0.264648	44.6249	0.447171	57.2959	0.34864	5.87833	0.705578	56.4954	0.3589	17.7409	0.630182	55.5732	0.394199	15.5713	0.64449	59.24	0.344861	2.75625	0.580719	54.0253	0.390055	4.47448	0.724906
Symbol Type	1	51.1454	0.385	1.05964	0.514854	1.83837	0.196819			67.0868	0.273955	62.4007	0.314192	52.2138	0.371845	66.8863	0.28553	65.0035	0.295766	52.9605	0.375949	50.9381	0.390954	52.4523	0.381896	69.6999	0.264648	44.1214	0.447171	56.8517	0.34864	5.75526	0.705578	56.0727	0.3589	17.5845	0.630182	55.0492	0.394199	15.3809	0.64449	58.6871	0.344861	2.54109	0.997039	53.5296	0.390055	4.43247	0.724906
Inverse Plot	TRUE	52.8302	0.3705	1.12023	0.458414	1.5557	0.252419			66.436	0.273375	61.9274	0.313926	51.7887	0.371461	66.3924	0.285244	64.3465	0.295088	52.4897	0.375516	50.5403	0.390472	51.7271	0.380973	69.1429	0.264352	43.6383	0.446542	56.4255	0.348305	5.63716	0.70515	55.6672	0.358584	17.4345	0.630014	54.5465	0.393567	15.1983	0.644288	58.1567	0.344435	26.5077	0.563935	53.054	0.38954	4.39216	0.724758
Color Plot	TRUE	69.9901	0.261	1.18629	0.408638	1.33697	0.326345			65.8655	0.272263	61.5123	0.313414	51.4159	0.370723	65.9594	0.284695	63.7705	0.293788	52.077	0.374684	50.1916	0.389546	51.0913	0.379201	68.6545	0.263785	43.2147	0.445334	56.0518	0.347661	5.53363	0.70433	55.3117	0.357978	17.3029	0.62969	54.1058	0.392354	15.0381	0.643901	57.6915	0.343617	26.2341	0.563303	52.637	0.388552	4.35682	0.724474
3D plot	FALSE	44.3732	0.4394	1.25856	0.364713	1.16298	0.425008			65.4213	0.270708	61.1892	0.312698	51.1257	0.369692	65.6223	0.283928	63.3221	0.29197	51.7557	0.373522	49.9201	0.388252	50.5963	0.376725	68.2743	0.262993	42.885	0.443645	55.7609	0.346761	5.45303	0.703183	55.0349	0.35713	17.2005	0.629237	53.7627	0.39066	14.9134	0.64336	57.3295	0.342474	26.0212	0.56242	52.3124	0.387171	4.32931	0.724077
Linear	FALSE	57.0738	0.3445	1.33792	0.325927	1.02154	0.557136			65.1396	0.268836	60.9843	0.311837	50.9417	0.368451	65.4085	0.283005	63.0376	0.289781	51.5519	0.372123	49.7479	0.386695	50.2823	0.373744	68.0332	0.262038	42.6758	0.441612	55.5764	0.345678	5.4019	0.701802	54.8593	0.35611	17.1355	0.628693	53.545	0.38862	14.8344	0.642709	57.0998	0.341098	25.8861	0.561357	52.1065	0.385509	4.31186	0.7236
Data Range	H354:K502	5.8168	0.7003	1.42545	0.291657	0.904487	0.734635			65.043	0.2668	60.9141	0.3109	50.8786	0.3671	65.3352	0.282	62.9402	0.2874	51.4821	0.3706	49.6889	0.385	50.1748	0.3705	67.9505	0.261	42.6042	0.4394	55.5132	0.3445	5.38438	0.7003	54.7992	0.355	17.1133	0.6281	53.4705	0.3864	14.8073	0.642	57.0211	0.3396	25.8398	0.5602	52.036	0.3837	4.30588	0.72308
Filled Symbols	FALSE	56.284	0.355	1.52243	0.261355	0.806198	0.973774			65.1396	0.264764	60.9843	0.309963	50.9417	0.365749	65.4085	0.280995	63.0376	0.285019	51.5519	0.369077	49.7479	0.383305	50.2823	0.367256	68.0332	0.259962	42.6758	0.437188	55.5764	0.343322	5.4019	0.698798	54.8593	0.35389	17.1355	0.627507	53.545	0.38418	14.8344	0.641291	57.0998	0.338102	25.8861	0.559043	52.1065	0.381891	4.31186	0.72256
ConcAge	FALSE	17.6627	0.6281	1.63044	0.234545	IsoLine	IsoLine			65.4213	0.262892	61.1892	0.309102	51.1257	0.364508	65.6223	0.280072	63.3221	0.28283	51.7557	0.367678	49.9201	0.381748	50.5963	0.364275	68.2743	0.259007	42.885	0.435155	55.7609	0.342239	5.45303	0.697417	55.0349	0.35287	17.2005	0.626963	53.7627	0.38214	14.9134	0.64064	57.3295	0.336726	26.0212	0.55798	52.3124	0.380229	4.32931	0.722083
ConcSwap	FALSE	55.3112	0.3864	1.75144	0.210807					65.8655	0.261337	61.5123	0.308386	51.4159	0.363477	65.9594	0.279305	63.7705	0.281012	52.077	0.366516	50.1916	0.380454	51.0913	0.361799	68.6545	0.258215	43.2147	0.433466	56.0518	0.341339	5.53363	0.69627	55.3117	0.352022	17.3029	0.62651	54.1058	0.380446	15.0381	0.640099	57.6915	0.335583	26.2341	0.557097	52.637	0.378848	4.35682	0.721686
1st Symbol-row	201	15.4761	0.642	1.88786	0.189772					66.436	0.260225	61.9274	0.307874	51.7887	0.362739	66.3924	0.278756	64.3465	0.279712	52.4897	0.365684	50.5403	0.379528	51.7271	0.360027	69.1429	0.257648	43.6383	0.432258	56.4255	0.340695	5.63716	0.69545	55.6672	0.351416	17.4345	0.626186	54.5465	0.379233	15.1983	0.639712	58.1567	0.334765	26.5077	0.556465	53.054	0.37786	4.39216	0.721402
		58.9636	0.3396	2.0428	0.171119					67.0868	0.259645	62.4007	0.307608	52.2138	0.362355	66.8863	0.27847	65.0035	0.279034	52.9605	0.365251	50.9381	0.379046	52.4523	0.359104	69.6999	0.257352	44.1214	0.431629	56.8517	0.34036	5.75526	0.695022	56.0727	0.3511	17.5845	0.626018	55.0492	0.378601	15.3809	0.63951	58.6871	0.334339	26.8197	0.556136	53.5296	0.377345	4.43247	0.721254
		26.9822	0.5602	2.22023	0.154565					67.765	0.259645	62.8941	0.307608	52.6569	0.362355	67.401	0.27847	65.6882	0.279034	53.4511	0.365251	51.3527	0.379046	53.2081	0.359104	70.2804	0.257352	44.6249	0.431629	57.2959	0.34036	5.87833	0.695022	56.4954	0.3511	17.7409	0.626018	55.5732	0.378601	15.5713	0.63951	59.24	0.334339	27.1448	0.556136	54.0253	0.377345	4.47448	0.721254
		53.7774	0.3837	2.42535	0.13986					68.4158	0.260225	63.3675	0.307874	53.0821	0.362739	67.8949	0.278756	66.3452	0.279712	53.9218	0.365684	51.7505	0.379528	53.9333	0.360027	70.8374	0.257648	45.1081	0.432258	57.7221	0.340695	5.99643	0.69545	56.9009	0.351416	17.8909	0.626186	56.0759	0.379233	15.7539	0.639712	59.7705	0.334765	27.4568	0.556465	54.5009	0.37786	4.51479	0.721402
		4.45347	0.72308	2.66511	0.126788					68.9864	0.261337	63.7825	0.308386	53.4548	0.363477	68.3279	0.279305	66.9212	0.281012	54.3345	0.366516	52.0992	0.380454	54.5691	0.361799	71.3258	0.258215	45.5316	0.433466	58.0958	0.341339	6.09997	0.69627	57.2564	0.352022	18.0225	0.62651	56.5166	0.380446	15.9141	0.640099	60.2356	0.335583	27.7304	0.557097	54.9178	0.378848	4.55013	0.721686
		60.6639	0.3306	2.94898	0.115157					69.4305	0.262892	64.1056	0.309102	53.745	0.364508	68.6649	0.280072	67.3696	0.28283	54.6558	0.367678	52.3707	0.381748	55.0641	0.364275	71.7059	0.259007	45.8614	0.435155	58.3866	0.342239	6.18056	0.697417	57.5332	0.35287	18.1249	0.626963	56.8597	0.38214	16.0387	0.64064	60.5977	0.336726	27.9433	0.55798	55.2424	0.380229	4.57764	0.722083
		61.0818	0.3231	3.29022	0.104798					69.7123	0.264764	64.3105	0.309963	53.9291	0.365749	68.8788	0.280995	67.6541	0.285019	54.8596	0.369077	52.5429	0.383305	55.3781	0.367256	71.9471	0.259962	46.0705	0.437188	58.5712	0.343322	6.23169	0.698798	57.7088	0.35389	18.1899	0.627507	57.0773	0.38418	16.1178	0.641291	60.8273	0.338102	28.0784	0.559043	55.4484	0.381891	4.59509	0.72256
		55.7084	0.3478	3.70803	0.0955634					69.8088	0.2668	64.3807	0.3109	53.9922	0.3671	68.952	0.282	67.7515	0.2874	54.9294	0.3706	52.6019	0.385	55.4856	0.3705	72.0297	0.261	46.1422	0.4394	58.6344	0.3445	6.24921	0.7003	57.7689	0.355	18.2121	0.6281	57.1519	0.3864	16.1449	0.642	60.906	0.3396	28.1247	0.5602	55.5189	0.3837	4.60107	0.72308
		59.5006	0.3225	4.23122	0.0873231
		55.7084	0.3479	4.90514	0.0799626
		67.5658	0.2743	5.80552	0.0733811
		7.80128	0.70671	7.06901	0.0674898
		56.3406	0.3391	8.96993	0.0622107
		43.1162	0.446	12.1519	0.0574746
		47.3277	0.417	18.5642	0.0532208
		55.2734	0.366	38.1843	0.0493956
		57.1938	0.365	IsoLine	IsoLine
		48.5995	0.408
		51.4011	0.394
		49.0263	0.3848
		22.6455	0.5814
		54.5686	0.3305
		60.3525	0.3265
		55.5612	0.3447
		57.3863	0.3462
		61.4887	0.3068
		5.63954	0.7033
		1.60969	0.7463
		0.380669	0.7445
		40.6927	0.4689
		64.9816	0.2747
		3.92607	0.7033
		1.39453	0.7285
		0.46619	0.7442
		70.3447	0.2613
		55.8919	0.3519
		51.8298	0.3434
		51.3887	0.3788
		59.2979	0.3115
		52.5566	0.3394
		54.9952	0.3471
		44.9492	0.4209
		55.9666	0.3478
		54.7266	0.3419
		53.6409	0.3523
		57.5338	0.3247
		55.8515	0.3296
		50.0632	0.3678
		47.3789	0.3847
		41.3731	0.4268
		54.2351	0.3669
		60.4825	0.3093
		67.7776	0.264491
		63.6176	0.291447
		62.8978	0.296752
		64.7879	0.294975
		71.3468	0.247459
		68.682	0.258658
		68.1049	0.270485
		69.9729	0.248452
		62.6543	0.290788
		68.0429	0.255179
		68.0334	0.271463
		68.1729	0.258266
		64.921	0.26195
		56.1458	0.330075
		37.9443	0.463075
		46.4562	0.403978
		47.592	0.389683
		51.2306	0.372498
		44.112	0.425057
		59.5394	0.321738
		39.7501	0.455954
		47.7603	0.395024
		65.3895	0.28061
		48.6922	0.380168
		60.299	0.313844
		66.2222	0.265935
		65.025	0.279718
		59.3927	0.31577
		63.9364	0.287474
		63.2777	0.287771
		66.7309	0.268762
		57.0556	0.322825
		52.6429	0.326189
		62.0701	0.291964
		72.1621	0.24801
		53.5105	0.34326
		72.9997	0.249054
		63.2059	0.306674
		57.4873	0.314
		42.2146	0.4134
		56.6208	0.3156
		63.6451	0.2742
		57.3464	0.3152
		63.4366	0.2884
		40.9672	0.4249
		28.6167	0.494
		66.4404	0.2786
		60.9791	0.2957
		59.5756	0.3213
		66.5161	0.2675
		66.3274	0.2746
		55.2779	0.3502
		64.9216	0.2774
		68.1513	0.2634
		38.823	0.442
		13.3568	0.6013
		51.5124	0.3742
		61.4939	0.3038
		60.6926	0.309
		55.4887	0.3351
		60.8521	0.3055
		56.0221	0.3381
		38.5668	0.428
		68.1117	0.2582
		59.3625	0.3049
		67.7938	0.251
		66.4404	0.2701
		68.071	0.255
		25.882	0.5596
		9.02876	0.647
		63.2479	0.2965
		67.5468	0.2646
		68.8641	0.2544
		63.5065	0.2929
		58.2933	0.3181
		70.1884	0.2492
		IsoLine	IsoLine
				52.8603	0.3742	62.9832	0.3038	61.9135	0.309	56.6291	0.3351	62.1083	0.3055	57.5775	0.3381	41.0189	0.428	69.9383	0.2582	61.5824	0.3049	69.2023	0.251	67.7956	0.2701	69.446	0.255	26.8548	0.5596	9.90177	0.647	64.4649	0.2965	68.8416	0.2646	70.1905	0.2544	64.7928	0.2929	60.0584	0.3181	71.5696	0.2492
				52.8057	0.37564	62.9229	0.305455	61.8641	0.310221	56.5829	0.336231	62.0574	0.306394	57.5145	0.33983	40.9196	0.43148	69.8644	0.260323	61.4925	0.307987	69.1452	0.252814	67.7407	0.271377	69.3903	0.255841	26.8154	0.561496	9.8664	0.651199	64.4156	0.297232	68.7892	0.265543	70.1367	0.255274	64.7407	0.294283	59.9869	0.320096	71.5137	0.250105
				52.6463	0.376963	62.7468	0.306976	61.7197	0.311343	56.448	0.33727	61.9089	0.307215	57.3306	0.34142	40.6296	0.434679	69.6484	0.262273	61.23	0.310824	68.9787	0.254482	67.5805	0.27255	69.2277	0.256615	26.7004	0.563239	9.76318	0.655057	64.2717	0.297905	68.6361	0.266409	69.9799	0.256077	64.5886	0.295554	59.7782	0.321931	71.3503	0.250936
				52.3951	0.378062	62.4692	0.308239	61.4921	0.312275	56.2355	0.338134	61.6748	0.307897	57.0407	0.342741	40.1726	0.437336	69.3079	0.263894	60.8162	0.313181	68.7161	0.255867	67.3279	0.273524	68.9714	0.257257	26.519	0.564687	9.60046	0.658263	64.0449	0.298464	68.3947	0.267129	69.7327	0.256744	64.3489	0.29661	59.4492	0.323456	71.0929	0.251627
				52.0723	0.378848	62.1126	0.309143	61.1998	0.312942	55.9624	0.338752	61.374	0.308385	56.6683	0.343686	39.5854	0.439237	68.8705	0.265053	60.2847	0.314868	68.3789	0.256858	67.0034	0.274222	68.6422	0.257717	26.2861	0.565723	9.39142	0.660557	63.7535	0.298864	68.0847	0.267644	69.4151	0.257221	64.0409	0.297365	59.0265	0.324546	70.7622	0.252121
				51.7042	0.379258	61.7058	0.309614	60.8663	0.313289	55.651	0.339074	61.0309	0.308639	56.2435	0.344179	38.9157	0.440227	68.3717	0.265657	59.6784	0.315746	67.9942	0.257374	66.6333	0.274585	68.2667	0.257956	26.0204	0.566262	9.15301	0.661752	63.4211	0.299073	67.7311	0.267912	69.0529	0.25747	63.6896	0.297759	58.5445	0.325114	70.385	0.252379
				51.3206	0.379258	61.2819	0.309614	60.5188	0.313289	55.3264	0.339074	60.6734	0.308639	55.8008	0.344179	38.2178	0.440227	67.8518	0.265657	59.0466	0.315746	67.5933	0.257374	66.2475	0.274585	67.8753	0.257956	25.7435	0.566262	8.90452	0.661752	63.0747	0.299073	67.3626	0.267912	68.6754	0.25747	63.3234	0.297759	58.0421	0.325114	69.9918	0.252379
				50.9525	0.378848	60.8752	0.309143	60.1854	0.312942	55.015	0.338752	60.3303	0.308385	55.376	0.343686	37.5481	0.439237	67.3529	0.265053	58.4403	0.314868	67.2087	0.256858	65.8774	0.274222	67.4997	0.257717	25.4779	0.565723	8.66611	0.660557	62.7424	0.298864	67.009	0.267644	68.3131	0.257221	62.9721	0.297365	57.5601	0.324546	69.6146	0.252121
				50.6297	0.378062	60.5186	0.308239	59.893	0.312275	54.7419	0.338134	60.0295	0.307897	55.0036	0.342741	36.9609	0.437336	66.9156	0.263894	57.9087	0.313181	66.8714	0.255867	65.5529	0.273524	67.1705	0.257257	25.2449	0.564687	8.45707	0.658263	62.451	0.298464	66.699	0.267129	67.9956	0.256744	62.6641	0.29661	57.1374	0.323456	69.2839	0.251627
				50.3785	0.376963	60.241	0.306976	59.6655	0.311343	54.5294	0.33727	59.7954	0.307215	54.7136	0.34142	36.5039	0.434679	66.5751	0.262273	57.495	0.310824	66.6089	0.254482	65.3003	0.27255	66.9142	0.256615	25.0636	0.563239	8.29435	0.655057	62.2242	0.297905	66.4576	0.266409	67.7483	0.256077	62.4244	0.295554	56.8084	0.321931	69.0264	0.250936
				50.2191	0.37564	60.0649	0.305455	59.5211	0.310221	54.3945	0.336231	59.6469	0.306394	54.5297	0.33983	36.2139	0.43148	66.3591	0.260323	57.2325	0.307987	66.4423	0.252814	65.14	0.271377	66.7516	0.255841	24.9486	0.561496	8.19112	0.651199	62.0803	0.297232	66.3045	0.265543	67.5915	0.255274	62.2723	0.294283	56.5997	0.320096	68.8631	0.250105
				50.1645	0.3742	60.0046	0.3038	59.4716	0.309	54.3483	0.3351	59.596	0.3055	54.4667	0.3381	36.1146	0.428	66.2851	0.2582	57.1426	0.3049	66.3853	0.251	65.0851	0.2701	66.6959	0.255	24.9092	0.5596	8.15576	0.647	62.031	0.2965	66.2521	0.2646	67.5378	0.2544	62.2202	0.2929	56.5282	0.3181	68.8072	0.2492
				50.2191	0.37276	60.0649	0.302145	59.5211	0.307779	54.3945	0.333969	59.6469	0.304606	54.5297	0.33637	36.2139	0.42452	66.3591	0.256077	57.2325	0.301813	66.4423	0.249186	65.14	0.268823	66.7516	0.254159	24.9486	0.557704	8.19112	0.642801	62.0803	0.295768	66.3045	0.263657	67.5915	0.253526	62.2723	0.291517	56.5997	0.316104	68.8631	0.248295
				50.3785	0.371437	60.241	0.300624	59.6655	0.306657	54.5294	0.33293	59.7954	0.303785	54.7136	0.33478	36.5039	0.421321	66.5751	0.254127	57.495	0.298976	66.6089	0.247518	65.3003	0.26765	66.9142	0.253385	25.0636	0.555961	8.29435	0.638943	62.2242	0.295095	66.4576	0.262791	67.7483	0.252723	62.4244	0.290246	56.8084	0.314269	69.0264	0.247464
				50.6297	0.370338	60.5186	0.299361	59.893	0.305725	54.7419	0.332066	60.0295	0.303103	55.0036	0.333459	36.9609	0.418664	66.9156	0.252506	57.9087	0.296619	66.8714	0.246133	65.5529	0.266676	67.1705	0.252743	25.2449	0.554513	8.45707	0.635737	62.451	0.294536	66.699	0.262071	67.9956	0.252056	62.6641	0.28919	57.1374	0.312744	69.2839	0.246773
				50.9525	0.369552	60.8752	0.298457	60.1854	0.305058	55.015	0.331448	60.3303	0.302615	55.376	0.332514	37.5481	0.416763	67.3529	0.251347	58.4403	0.294932	67.2087	0.245142	65.8774	0.265978	67.4997	0.252283	25.4779	0.553477	8.66611	0.633443	62.7424	0.294136	67.009	0.261556	68.3131	0.251579	62.9721	0.288435	57.5601	0.311654	69.6146	0.246279
				51.3206	0.369142	61.2819	0.297986	60.5188	0.304711	55.3264	0.331126	60.6734	0.302361	55.8008	0.332021	38.2178	0.415773	67.8518	0.250743	59.0466	0.294054	67.5933	0.244626	66.2475	0.265615	67.8753	0.252044	25.7435	0.552938	8.90452	0.632248	63.0747	0.293927	67.3626	0.261288	68.6754	0.25133	63.3234	0.288041	58.0421	0.311086	69.9918	0.246021
				51.7042	0.369142	61.7058	0.297986	60.8663	0.304711	55.651	0.331126	61.0309	0.302361	56.2435	0.332021	38.9157	0.415773	68.3717	0.250743	59.6784	0.294054	67.9942	0.244626	66.6333	0.265615	68.2667	0.252044	26.0204	0.552938	9.15301	0.632248	63.4211	0.293927	67.7311	0.261288	69.0529	0.25133	63.6896	0.288041	58.5445	0.311086	70.385	0.246021
				52.0723	0.369552	62.1126	0.298457	61.1998	0.305058	55.9624	0.331448	61.374	0.302615	56.6683	0.332514	39.5854	0.416763	68.8705	0.251347	60.2847	0.294932	68.3789	0.245142	67.0034	0.265978	68.6422	0.252283	26.2861	0.553477	9.39142	0.633443	63.7535	0.294136	68.0847	0.261556	69.4151	0.251579	64.0409	0.288435	59.0265	0.311654	70.7622	0.246279
				52.3951	0.370338	62.4692	0.299361	61.4921	0.305725	56.2355	0.332066	61.6748	0.303103	57.0407	0.333459	40.1726	0.418664	69.3079	0.252506	60.8162	0.296619	68.7161	0.246133	67.3279	0.266676	68.9714	0.252743	26.519	0.554513	9.60046	0.635737	64.0449	0.294536	68.3947	0.262071	69.7327	0.252056	64.3489	0.28919	59.4492	0.312744	71.0929	0.246773
				52.6463	0.371437	62.7468	0.300624	61.7197	0.306657	56.448	0.33293	61.9089	0.303785	57.3306	0.33478	40.6296	0.421321	69.6484	0.254127	61.23	0.298976	68.9787	0.247518	67.5805	0.26765	69.2277	0.253385	26.7004	0.555961	9.76318	0.638943	64.2717	0.295095	68.6361	0.262791	69.9799	0.252723	64.5886	0.290246	59.7782	0.314269	71.3503	0.247464
				52.8057	0.37276	62.9229	0.302145	61.8641	0.307779	56.5829	0.333969	62.0574	0.304606	57.5145	0.33637	40.9196	0.42452	69.8644	0.256077	61.4925	0.301813	69.1452	0.249186	67.7407	0.268823	69.3903	0.254159	26.8154	0.557704	9.8664	0.642801	64.4156	0.295768	68.7892	0.263657	70.1367	0.253526	64.7407	0.291517	59.9869	0.316104	71.5137	0.248295
				52.8603	0.3742	62.9832	0.3038	61.9135	0.309	56.6291	0.3351	62.1083	0.3055	57.5775	0.3381	41.0189	0.428	69.9383	0.2582	61.5824	0.3049	69.2023	0.251	67.7956	0.2701	69.446	0.255	26.8548	0.5596	9.90177	0.647	64.4649	0.2965	68.8416	0.2646	70.1905	0.2544	64.7928	0.2929	60.0584	0.3181	71.5696	0.2492
[truncated: 206 more columns]

## Sheet: Table S3
Table S3 U-Pb ID-TIMS isotopic data for TARIM calcite
							Corrected for initial common Pb														Not corrected for initial common Pb
[a]	[b]	[b]	[c]	[d]	[e]	[f]	[g]		[g]		[h]	[g]		[g]		[g]		[g]		[i]	[j]	[j]	[j]	[j]		[j]
Analysis no.	Weight	U	Th/U	Pb*/	PbC	206Pb/	207Pb/	2s	206Pb/	2s	Error	207Pb/	2s	206Pb/	2s	207Pb/	2s	207Pb/	2s	%	206Pb/	207Pb/	208Pb/	238U/	±2σ	207Pb/	±2σ
	(mg)	(μg•g-1)		Pbc	(pg)	204Pb	235U	(abs)	238U	(abs)	Corr	206Pb	[abs]	238U	[abs]	235U	[abs]	206Pb	[abs]	Disc	204Pb	204Pb	204Pb	206Pb	[abs]	206Pb	[abs]
														Age (Ma)		Age (Ma)		Age (Ma)
C1	50	0.318951	0.0372561	2.23495	384.64	104.103	0.221433	0.03287	0.0327596	0.000289751	0.0127709	0.0490233	0.00728831	207.797	1.80875	203.102	27.5088	148.946	301.874	-40.1521	104.327	19.8266	39.1913	25.1772	0.0575025	0.190043	0.000341859
C2	1.4	0.403657	0.00219818	1.52525	25.2238	57.9324	0.226169	0.068322	0.0326449	0.00058542	0.00858777	0.0502477	0.0152063	207.081	3.65512	207.031	57.3716	206.47	420.832	-0.300612	59.5745	17.6821	38.1834	21.2224	0.277802	0.296807	0.007258
C3	17	0.549142	0.0199002	1.86181	174.022	78.6963	0.226602	0.0463929	0.032573	0.000514799	0.0392054	0.0504551	0.0103348	206.632	3.21425	207.39	38.766	216.012	437.04	4.41243	79.0462	18.6736	38.5618	23.5963	0.242451	0.236237	0.000923863
C4	1.2	0.404277	0.0211692	1.62719	17.4101	66.1021	0.220137	0.0554986	0.0325578	0.00047662	0.0114166	0.0490385	0.0123824	206.537	2.97599	202.024	46.7113	149.672	308.104	-38.6053	69.0258	18.0959	38.5192	22.5733	0.375275	0.262162	0.00983593
C5	1.2	0.559716	0.00211051	1.61854	24.6867	64.5115	0.22247	0.0578446	0.0322419	0.00049703	0.0102047	0.0500439	0.013034	204.564	3.10439	203.964	48.6161	197.031	401.139	-3.88441	66.4691	18.0189	38.2126	22.4778	0.270326	0.271087	0.00695512
C6	1.2	0.37961	<0.001	1.11812	80.3084	27.8903	0.21715	0.285116	0.0320508	0.00242688	0.00325786	0.0491382	0.0646565	203.371	15.1679	199.535	252.885	154.429	400.037	-32.1954	28.0124	16.0846	37.7568	10.7987	0.0927328	0.574197	0.00242256
Notes:
[a] C is calcite fragment
[b] weighed on microbalance.
[c] Th/U calculated from radiogenic 208Pb/206Pb ratio and 207Pb/206Pb age assuming concordance.
[d] ratio of radiogenic Pb to common Pb.
[e] Pbc is total common Pb (of which 1.0 picograms are assumed to be laboratory blank with isotopic composition: 206Pb/204Pb=18.49±0.4%; 207Pb/204Pb=15.59±0.4%;208Pb/204Pb=39.36±0.4%).
[f] 206Pb/204Pb corrected for fractionation and common Pb in the spike.
[g] corrected for fractionation, common Pb in the spike, blank and initial common Pb (using the model of Stacey and Kramers 1975).
[h] Error Corr is correlation coefficient of X-Y errors on the concordia plot.
[i] Disc is percent discordance for the given 207Pb/206Pb age relative to the 206Pb/238U age.
[j] corrected for fractionation, common Pb in the spike and blank (not for initial common Pb).
238U/235U ratio of 137.818 (Hiess et al., 2012) was used for 207Pb and 235U and 207Pb/206Pb model age calculations.
Decay constants are those of Jaffey et al. (1971): 238U and 235U are 1.55125 X 10-10/yr and 9.8485 X 10-10/yr.

## Sheet: Table S4
Table S4 Signal intensities, element compositions and isotope ratios of the TARIM and QC standard DuffBrown with LA-MC-ICPMS under different laser parameters and different grains
Sample	Intensity			Concentration (μg·g-1)			Isotope ratios
	238U (V)	207Pb (CPS)	206Pb (CPS)	U	Th	Pb	238U/206Pb	2σ	207Pb/206Pb	2σ	f206
Session1 2021-11-10 TARIM-A 130 μm 10 Hz 2 J·cm-2
TARIM-A 01	0.015715	1453	27935	1.835	0.0319	0.000804	30.4171	0.660336	0.0512925	0.000641862	0.0012492
TARIM-A 02	0.01844	1644	32250	2.1523	0.0359	0.000847	30.9278	0.665639	0.0508305	0.00060195	0.00067863
TARIM-A 03	0.013963	1300	24450	1.6294	0.03	0.000925	30.9552	0.668315	0.0518805	0.000651875	0.00197538
TARIM-A 04	0.01507	1375	26270	1.758	0.0293	0.000876	30.9461	0.674983	0.051366	0.000681757	0.00133997
TARIM-A 05	0.01922	1668	33060	2.242	0.0339	0.000796	31.3339	0.672795	0.050337	0.000532164	6.91598e-05
TARIM-A 06	0.017	1555	30240	1.981	0.0337	0.001093	30.0343	0.6515	0.0512715	0.000721654	0.00122326
TARIM-A 07	0.014673	1384	25920	1.7089	0.0307	0.001162	30.5233	0.6651	0.0525525	0.000661895	0.00280529
TARIM-A 08	0.01492	1351	25940	1.737	0.0279	0.000782	30.9643	0.67541	0.0511455	0.000651823	0.00106765
TARIM-A 09	0.01719	1521	30000	2.001	0.0306	0.000847	30.7737	0.670952	0.050253	0.000552078	-3.45799e-05
TARIM-A 10	0.0163	1465	28340	1.898	0.0299	0.000891	30.9005	0.67152	0.050967	0.000582028	0.000847207
TARIM-A 11	0.01672	1559	30430	1.942	0.0311	0.000899	29.5027	0.658745	0.0511245	0.000711668	0.00104172
TARIM-A 12	0.01638	1482	28870	1.902	0.035	0.000922	30.2768	0.666767	0.0509985	0.000591996	0.00088611
TARIM-A 13	0.0164	1493	28930	1.904	0.0345	0.000896	30.303	0.664813	0.0512295	0.000562121	0.00117139
TARIM-A 14	0.0185	1641	32230	2.146	0.0364	0.000987	30.6928	0.669059	0.050967	0.000591993	0.000847207
TARIM-A 15	0.02177	1956	37950	2.525	0.0409	0.001617	30.5766	0.664021	0.05229	0.000532335	0.00248111
TARIM-A 16	0.01658	1512	29510	1.921	0.0314	0.000802	29.9658	0.652111	0.0510405	0.000611934	0.00093798
TARIM-A 17	0.02581	2215	44710	2.991	0.0516	0.001089	30.7467	0.67032	0.0507045	0.000641819	0.000523021
TARIM-A 18	0.02298	2002	40360	2.661	0.0501	0.001021	29.9231	0.678464	0.050505	0.000532178	0.000276639
TARIM-A 19	0.02083	1787	36070	2.412	0.0474	0.000933	30.7737	0.664189	0.0500535	0.000492313	-0.000280962
TARIM-A 20	0.01898	1658	32920	2.198	0.0414	0.000821	30.7377	0.670109	0.0505575	0.00057203	0.000341476
TARIM-A 21	0.02174	1888	38000	2.513	0.038	0.000781	30.426	0.654332	0.050463	0.000512259	0.000224769
TARIM-A 22	0.02445	2110	42630	2.827	0.0427	0.000885	30.4436	0.65669	0.0505995	0.000492364	0.000393346
TARIM-A 23	0.02429	2072	41770	2.807	0.0482	0.000937	30.8914	0.666865	0.0506835	0.000472472	0.000497086
TARIM-A 24	0.02081	1785	35910	2.404	0.044	0.000833	30.7647	0.668374	0.0503685	0.000532166	0.000108062
TARIM-A 25	0.018195	1569	31320	2.1022	0.0391	0.000823	30.9187	0.669655	0.0502005	0.000562037	-9.94172e-05
TARIM-A 26	0.01697	1510	29680	1.958	0.0308	0.000596	30.3556	0.658914	0.0509355	0.000552135	0.000808305
TARIM-A 27	0.02404	2052	41350	2.773	0.0388	0.000862	30.7557	0.665915	0.0507465	0.000522241	0.000574891
TARIM-A 28	0.02035	1737	34850	2.347	0.0353	0.000699	30.9278	0.667693	0.0504315	0.000532172	0.000185867
TARIM-A 29	0.01975	1688	33780	2.278	0.0373	0.000705	30.9005	0.676428	0.050547	0.000562065	0.000328509
TARIM-A 30	0.02613	2188	44600	3.013	0.0508	0.000992	30.9826	0.671122	0.0503685	0.000472442	0.000108062
Session 2 2021-11-10 TARIM-A 130 μm 6 Hz 6 J·cm-2
TARIM-A 01	0.02036	23700	60500	1.84	0.042	0.1063	18.4036	0.877875	0.368	0.0230095	0.392382
TARIM-A 02	0.01891	27800	61700	1.711	0.0394	0.119	16.6433	0.907243	0.416	0.0260108	0.451662
TARIM-A 03	0.02145	24400	62900	1.943	0.0428	0.109	18.7338	0.879028	0.365	0.0230094	0.388677
TARIM-A 04	0.02268	25200	65400	2.0566	0.0444	0.114	18.8569	0.888934	0.361	0.0230092	0.383737
TARIM-A 05	0.01824	49100	86600	1.657	0.0473	0.308	11.3589	0.527423	0.576	0.0130413	0.649261
TARIM-A 06	0.01928	22800	57800	1.772	0.0405	0.104	18.4036	0.903287	0.364	0.0240089	0.387442
TARIM-A 07	0.01934	22600	57300	1.781	0.0394	0.102	18.2573	0.916088	0.364	0.0240089	0.387442
TARIM-A 08	0.01958	21500	56300	1.808	0.0406	0.1	19.013	0.928657	0.352	0.025008	0.372622
TARIM-A 09	0.01857	19300	52300	1.718	0.0371	0.0914	19.2359	0.892363	0.346	0.0240081	0.365212
TARIM-A 10	0.02722	19300	66100	2.526	0.0495	0.0887	22.1696	0.889863	0.277	0.0190065	0.279997
TARIM-A 11	0.01871	18200	51600	1.78	0.0384	0.0869	19.5303	0.887717	0.332	0.0210085	0.347922
TARIM-A 12	0.020668	15200	51200	1.9741	0.0385	0.0672	21.7086	0.892798	0.276	0.0200062	0.278762
TARIM-A 13	0.0164	13200	42000	1.572	0.0379	0.0589	21.0327	0.942183	0.289	0.0230059	0.294817
TARIM-A 14	0.02988	11900	63000	2.875	0.0483	0.0487	25.2948	0.889521	0.183	0.0160034	0.163907
TARIM-A 15	0.03297	12600	68000	3.183	0.0532	0.0505	25.818	0.872912	0.172	0.0150032	0.150323
TARIM-A 16	0.01741	12500	42800	1.712	0.0392	0.0589	21.7086	0.959584	0.27	0.0210056	0.271352
TARIM-A 17	0.01689	10600	39500	1.663	0.0382	0.0461	22.7854	1.0411	0.243	0.0230042	0.238007
TARIM-A 18	0.01723	11700	41200	1.699	0.0411	0.0504	22.2125	0.961693	0.256	0.0220048	0.254062
TARIM-A 19	0.02236	10100	48100	2.207	0.0387	0.0445	24.4858	0.884763	0.205	0.0180038	0.191077
TARIM-A 20	0.02341	11200	50400	2.311	0.0398	0.0485	24.6964	0.896309	0.207	0.0180039	0.193547
TARIM-A 21	0.02466	10500	52000	2.418	0.0476	0.0449	25.0193	0.875202	0.191	0.0180033	0.173787
TARIM-A 22	0.02514	10400	52700	2.459	0.0468	0.042	25.1288	0.961259	0.182	0.018003	0.162672
TARIM-A 23	0.02661	8950	53000	2.596	0.0452	0.0376	26.3814	0.884329	0.172	0.0170028	0.150323
TARIM-A 24	0.02809	9200	55500	2.732	0.0459	0.0368	26.4118	0.84667	0.157	0.0140029	0.131798
TARIM-A 25	0.02518	8600	49900	2.442	0.0409	0.0347	26.3996	0.905662	0.162	0.0150028	0.137973
TARIM-A 26	0.02133	8300	43800	2.004	0.0416	0.0367	25.5765	0.945457	0.175	0.0180028	0.154028
TARIM-A 27	0.0229	6880	44300	2.139	0.0447	0.0286	26.9891	0.922352	0.142	0.0150022	0.113273
TARIM-A 28	0.02064	7430	41800	1.918	0.0369	0.0309	25.6909	0.951956	0.169	0.0180026	0.146618
TARIM-A 29	0.02093	6710	40600	1.934	0.0348	0.0278	26.9258	0.898063	0.153	0.0150025	0.126858
TARIM-A 30	0.0196	6690	38600	1.801	0.0332	0.0295	26.5093	0.906977	0.165	0.0160028	0.141678
Session 3 2022-04-26 TARIM-B 75 μm 10 Hz 3 J·cm-2
TARIM-B 01	0.005456	841	10400	0.707	0.0038	0.00153	28.812	0.941424	0.0582	0.00250876	0.00977994
TARIM-B 02	0.004552	696	8600	0.588	0.0065	0.00094	29.0677	0.955607	0.0558	0.00201006	0.00681594
TARIM-B 03	0.00436	712	8160	0.561	0.0067	0.00111	29.3705	0.96821	0.0574	0.00300711	0.00879194
TARIM-B 04	0.00813	1041	14670	1.042	0.0084	0.00091	30.1148	0.973281	0.0533	0.00141309	0.00372845
TARIM-B 05	0.003984	645	7528	0.5098	0.0092	0.00097	29.0328	0.956242	0.0567	0.00280743	0.00792744
TARIM-B 06	0.007189	962	12950	0.904	0.0056	0.00115	29.9585	0.971026	0.0543	0.0016119	0.00496345
TARIM-B 07	0.007218	920	12740	0.906	0.0038	0.001026	30.5782	0.984514	0.0535	0.00111673	0.00397545
TARIM-B 08	0.00728	934	12840	0.913	0.0026	0.00098	30.586	0.989118	0.054	0.00121564	0.00459295
TARIM-B 09	0.008643	1073	15100	1.082	0.0103	0.00116	30.8114	0.988347	0.0541	0.00111711	0.00471645
TARIM-B 10	0.004484	638	8057	0.5611	0.0036	0.00068	30.1523	0.986154	0.0537	0.00190981	0.00422245
TARIM-B 11	0.004587	705	8217	0.5708	0.0057	0.00138	29.9585	0.985091	0.0603	0.0028084	0.0123734
TARIM-B 12	0.004945	689	8750	0.615	0.0037	0.00093	30.3638	0.9864	0.0551	0.00161225	0.00595145
TARIM-B 13	0.005667	790	9870	0.7045	0.0077	0.00118	30.6246	1.00655	0.0567	0.00240866	0.00792744
TARIM-B 14	0.004618	654	8230	0.574	0.0019	0.00079	29.9733	0.983672	0.0549	0.00280697	0.00570445
TARIM-B 15	0.005491	733	9640	0.6822	0.0057	0.00092	30.3182	0.986534	0.054	0.00141343	0.00459295
TARIM-B 16	0.007179	919	12440	0.89	0.0053	0.00125	30.5166	0.982468	0.0555	0.00151325	0.00644545
TARIM-B 17	0.00719	932	12390	0.891	0.007	0.00089	30.7255	1.00417	0.0547	0.00310625	0.00545745
TARIM-B 18	0.0068	845	11530	0.843	0.0072	0.00097	31.1119	1.00372	0.0539	0.00121559	0.00446945
TARIM-B 19	0.005223	690	9040	0.648	0.0044	0.00075	30.3942	0.987437	0.0542	0.00151264	0.00483995
TARIM-B 20	0.004963	683	8550	0.616	0.006	0.00102	30.509	1.00877	0.0564	0.00171208	0.00755694
TARIM-B 21	0.006352	853	11080	0.7917	0.0057	0.00105	29.8626	0.969339	0.0555	0.00161243	0.00644545
TARIM-B 22	0.006582	940	11460	0.821	0.0056	0.00152	30.1898	0.993249	0.0551	0.00151306	0.00595145
TARIM-B 23	0.00663	829	11440	0.828	0.0045	0.00101	30.0999	0.975814	0.0536	0.00131424	0.00409895
TARIM-B 24	0.00685	840	11700	0.856	0.0034	0.00082	30.3486	0.982662	0.0535	0.00190974	0.00397545
TARIM-B 25	0.006526	837	11330	0.816	0.0028	0.00094	29.8185	0.974574	0.0544	0.00131467	0.00508695
TARIM-B 26	0.00446	664	7814	0.5576	0.0005	0.00129	29.4705	0.986687	0.0602	0.00380617	0.0122499
TARIM-B 27	0.004451	660	7739	0.556	0.0036	0.00127	29.6943	0.970271	0.0603	0.00211119	0.0123734
TARIM-B 28	0.004885	715	8350	0.6097	0.0042	0.00137	30.07	0.991032	0.0601	0.00260899	0.0121264
TARIM-B 29	0.00525	682	8980	0.654	0.0036	0.00093	30.07	0.976395	0.0551	0.00171153	0.00595145
TARIM-B 30	0.0056	745	9530	0.697	0.004	0.00129	30.235	0.978829	0.0579	0.00141543	0.00940944
Session 4 2022-05-03 TARIM-C 130 μm 10 Hz 3 J·cm-2
TARIM-C 01	0.008355	642	8080	0.4041	0.0034	0.0008	29.407	0.496594	0.0594	0.00207332	0.0112619
TARIM-C 02	0.0152	1009	14220	0.7348	0.0054	0.0007	30.3041	0.492553	0.054	0.00139169	0.00459295
TARIM-C 03	0.00682	513	6478	0.3299	0.0072	0.00066	29.9337	0.517734	0.057	0.00158902	0.00829794
TARIM-C 04	0.01539	974	14252	0.7442	0.0049	0.000436	30.6391	0.4985	0.05198	0.000932036	0.00209826
TARIM-C 05	0.00886	651	8292	0.4285	0.0042	0.000758	30.339	0.511424	0.0586	0.00159394	0.0102739
TARIM-C 06	0.006987	519	6647	0.3381	0.0064	0.00061	29.8319	0.501587	0.0574	0.00149628	0.00879194
TARIM-C 07	0.012094	815	11490	0.5849	0.0048	0.00054	29.8066	0.501097	0.0536	0.00157898	0.00409895
TARIM-C 08	0.01447	893	13369	0.6998	0.004	0.000353	30.5857	0.500319	0.05061	0.00100444	0.000406314
TARIM-C 09	0.01554	947	14325	0.7518	0.0052	0.000422	30.6748	0.50486	0.05033	0.000847645	6.05148e-05
TARIM-C 10	0.01492	925	13821	0.7216	0.0044	0.000425	30.5148	0.501931	0.05076	0.000996234	0.000591563
TARIM-C 11	0.007017	483	6620	0.3396	0.0054	0.000456	30.0019	0.511776	0.0535	0.00157869	0.00397545
TARIM-C 12	0.006699	452	6327	0.3242	0.005	0.000331	29.9592	0.50405	0.0521	0.00138555	0.00224646
TARIM-C 13	0.011052	718	10299	0.5348	0.0055	0.000423	30.2953	0.503986	0.0523	0.00110974	0.00249346
TARIM-C 14	0.01144	730	10708	0.5534	0.0057	0.000376	30.1306	0.500888	0.05121	0.00106041	0.00114731
TARIM-C 15	0.01184	757	11004	0.573	0.0035	0.000463	30.3302	0.504644	0.0517	0.00110735	0.00175246
TARIM-C 16	0.01662	1040	15697	0.8041	0.0052	0.000343	29.7644	0.485566	0.05048	0.000959834	0.000245764
TARIM-C 17	0.01205	763	11300	0.5833	0.0023	0.000324	29.9677	0.49195	0.0508	0.0010319	0.000640963
TARIM-C 18	0.01811	1119	16920	0.8764	0.0043	0.000337	30.0876	0.488719	0.05041	0.00080665	0.000159315
TARIM-C 19	0.01213	768	11353	0.5872	0.0024	0.000346	30.0361	0.496088	0.05086	0.00103215	0.000715063
TARIM-C 20	0.01074	693	10154	0.5197	0.0046	0.000394	29.7392	0.49661	0.05108	0.00102418	0.000986762
TARIM-C 21	0.006749	452	6190	0.3276	0.0059	0.000396	30.1048	0.517502	0.0534	0.0014837	0.00385195
TARIM-C 22	0.006642	447	6096	0.3225	0.0067	0.000463	30.1048	0.51384	0.0535	0.00139006	0.00397545
TARIM-C 23	0.006628	452	6063	0.3218	0.0074	0.000462	30.1738	0.522714	0.0544	0.00148677	0.00508695
TARIM-C 24	0.00632	452	5810	0.3068	0.0031	0.000562	30.019	0.519501	0.0573	0.00168461	0.00866844
TARIM-C 25	0.006704	472	6116	0.3255	0.0066	0.000599	30.2518	0.513199	0.0565	0.00140007	0.00768044
TARIM-C 26	0.006551	464	6135	0.3181	0.006	0.00046	29.3988	0.496433	0.0553	0.00158393	0.00619845
TARIM-C 27	0.008019	564	7486	0.3894	0.0035	0.000632	29.5059	0.498528	0.056	0.00139837	0.00706294
TARIM-C 28	0.006583	463	6145	0.3197	0.0061	0.000474	29.4976	0.498366	0.0552	0.00139567	0.00607495
TARIM-C 29	0.006753	466	6263	0.328	0.0055	0.000403	29.8066	0.562338	0.0532	0.00129598	0.00360495
TARIM-C 30	0.006414	444.3	6035	0.3115	0.0061	0.000547	29.2356	0.50336	0.0538	0.00139104	0.00434595
Session 5 2022-05-03 TARIM-D 130 μm 10 Hz 3 J·cm-2
TARIM-D 01	0.01296	1180	13010	0.544	0.0371	0.00144		0.425473	0.0559	0.00363122	0.00693944
TARIM-D 02	0.00693	1043	7390	0.291	0.0259	0.00352	27.2515	0.405107	0.0955	0.00447425	0.0558453
TARIM-D 03	0.01365	1020	13190	0.574	0.0379	0.00104	30.1637	0.448366	0.0518	0.00342839	0.00187596
TARIM-D 04	0.0101	830	9920	0.425	0.0341	0.00132	29.906	0.438904	0.0533	0.00244239	0.00372845
TARIM-D 05	0.01706	1203	16550	0.7183	0.0454	0.00158	30.0172	0.416245	0.053	0.00166221	0.00335796
TARIM-D 06	0.01814	1317	17710	0.7678	0.0469	0.00176	29.8295	0.396757	0.0548	0.00195626	0.00558095
TARIM-D 07	0.013848	4526	17010	0.5866	0.0378	0.02015	23.8149	0.374276	0.2099	0.00392851	0.197129
TARIM-D 08	0.016211	3220	17890	0.6872	0.0534	0.01301	26.4951	0.397946	0.1392	0.00436348	0.109815
TARIM-D 09	0.0149	1074	14490	0.632	0.0288	0.00136	29.872	0.403519	0.0551	0.00138179	0.00595145
TARIM-D 10	0.00244	291	2547	0.1037	0.011	0.00067	28.7199	0.598751	0.0644	0.00493048	0.0174369
TARIM-D 11	0.01864	1320	17890	0.7952	0.0412	0.001143	30.3995	0.483675	0.0522	0.00244067	0.00236996
TARIM-D 12	0.004134	404	4055	0.1766	0.0139	0.00095	29.7788	0.588682	0.0633	0.00413515	0.0160784
TARIM-D 13	0.012742	890	12290	0.5444	0.04	0.00113	30.1984	0.44439	0.0532	0.00224599	0.00360495
TARIM-D 14	0.02101	1279	19870	0.898	0.0658	0.00131	30.639	0.415425	0.04879	0.000729375	-0.00184138
TARIM-D 15	0.01056	1180	10500	0.452	0.0423	0.00298	29.4035	0.421263	0.0755	0.00424875	0.0311454
TARIM-D 16	0.01677	1071	16071	0.7211	0.0418	0.001137	30.2245	0.412387	0.05018	0.000889004	-0.000124735
TARIM-D 17	0.019214	1499	18631	0.827	0.0887	0.00346	29.9145	0.39	0.0611	0.0027495	0.0133614
TARIM-D 18	0.01924	1232	18180	0.8285	0.0588	0.00149	30.6301	0.426384	0.0505	0.00136903	0.000270464
TARIM-D 19	0.01714	1081	15960	0.739	0.0361	0.001084	31.0375	0.425331	0.05104	0.000936545	0.000937362
TARIM-D 20	0.01667	1193	15770	0.7191	0.0645	0.002	30.5855	0.43805	0.0551	0.0023472	0.00595145
TARIM-D 21	0.01675	1080	15967	0.7263	0.053	0.001376	30.2943	0.41708	0.05104	0.00102621	0.000937362
TARIM-D 22	0.01836	1653	17640	0.7966	0.0541	0.00406	30.0687	0.397433	0.0714	0.00218594	0.0260819
TARIM-D 23	0.01907	1630	18280	0.828	0.0538	0.00353	30.0343	0.42032	0.0663	0.00285615	0.0197834
TARIM-D 24	0.01804	1184	17080	0.784	0.0586	0.001657	30.4436	0.40292	0.05247	0.000942238	0.00270341
TARIM-D 25	0.01713	1097	16440	0.745	0.1025	0.00213	30.0257	0.409243	0.04931	0.000938762	-0.00119918
TARIM-D 26	0.01423	891	13693	0.6219	0.0818	0.001564	29.9829	0.402055	0.04859	0.000830049	-0.00208838
TARIM-D 27	0.02419	1490	22830	1.058	0.0634	0.00142	30.426	0.405643	0.04934	0.000992919	-0.00116213
TARIM-D 28	0.03096	1796	28970	1.355	0.0998	0.001922	30.7197	0.404086	0.04789	0.000621773	-0.00295288
TARIM-D 29	0.01544	1044	14670	0.676	0.0616	0.00181	30.1898	0.408438	0.0535	0.001472	0.00397545
TARIM-D 30	0.010258	699	9951	0.4499	0.0785	0.001782	29.6946	0.414619	0.0516	0.00137199	0.00162896
TARIM-D 31	0.009506	1111	9610	0.4191	0.065	0.00412	28.4939	0.408996	0.0843	0.00347469	0.0420133
TARIM-D 32	0.02085	1277	19270	0.92	0.0889	0.00204	31.0927	0.406672	0.05062	0.00096163	0.000418664
TARIM-D 33	0.01346	944	12702	0.5941	0.0705	0.002066	30.3995	0.415162	0.05596	0.00109834	0.00701354
TARIM-D 34	0.01219	832	11565	0.5386	0.0669	0.00168	30.3205	0.421252	0.0539	0.00104571	0.00446945
TARIM-D 35	0.0112	792	10460	0.4951	0.0394	0.001406	30.7467	0.424426	0.0564	0.00110897	0.00755694
TARIM-D 36	0.01434	905	13338	0.6375	0.0312	0.000948	30.8461	0.429978	0.0512	0.00118296	0.00113496
TARIM-D 37	0.00952	768	8930	0.4235	0.0211	0.00152	30.6748	0.444088	0.0592	0.00206233	0.0110149
TARIM-D 38	0.01363	922	12790	0.607	0.0764	0.002046	30.5144	0.420648	0.05444	0.00097659	0.00513635
TARIM-D 39	0.007911	713	7680	0.3526	0.0244	0.00175	29.6192	0.409711	0.0687	0.00247002	0.0227474
TARIM-D 40	0.00881	676	8390	0.3931	0.0225	0.001149	30.1551	0.426331	0.0597	0.00130288	0.0116324
TARIM-D 41	0.01678	1043	15830	0.752	0.0475	0.001202	30.2071	0.41567	0.05017	0.000845432	-0.000137085
TARIM-D 42	0.00957	690	8954	0.4294	0.0393	0.001396	30.6212	0.430239	0.0575	0.00120369	0.00891544
TARIM-D 43	0.01757	1138	16350	0.789	0.0601	0.001739	30.6659	0.419397	0.05329	0.000884747	0.0037161
TARIM-D 44	0.02125	1344	19620	0.9547	0.0484	0.00154	30.8642	0.418941	0.05261	0.000830647	0.00287631
TARIM-D 45	0.01677	1175	15600	0.754	0.0502	0.0017	30.5855	0.43805	0.055	0.00215141	0.00582795
TARIM-D 46	0.01325	1000	12330	0.5989	0.0527	0.00221	30.5321	0.424757	0.0614	0.0015882	0.0137319
TARIM-D 47	0.01353	928	12518	0.6123	0.0505	0.00173	30.6928	0.427426	0.056	0.00129096	0.00706294
TARIM-D 48	0.0142	965	12810	0.643	0.0482	0.0019	31.4465	0.431895	0.0564	0.00274223	0.00755694
TARIM-D 49	0.016949	1059	15427	0.7679	0.057	0.00157	31.2686	0.429035	0.052	0.00109333	0.00212296
TARIM-D 50	0.01826	1798	17120	0.8281	0.0577	0.00562	30.3907	0.399346	0.0808	0.00259262	0.0376909
TARIM-D 51	0.01443	890	13310	0.658	0.0461	0.001117	30.8551	0.434219	0.05092	0.000918386	0.000789163
TARIM-D 52	0.017792	1164	16416	0.8118	0.0677	0.00202	30.828	0.411663	0.054	0.00119192	0.00459295
TARIM-D 53	0.013517	923	12340	0.6173	0.0541	0.00176	31.185	0.431587	0.056	0.00205586	0.00706294
TARIM-D 54	0.01662	980	15190	0.76	0.0653	0.001347	30.9735	0.424306	0.04913	0.000815104	-0.00142148
TARIM-D 55	0.01649	988	15000	0.754	0.063	0.001344	31.1665	0.420127	0.05036	0.000854889	9.75647e-05
TARIM-D 56	0.016025	983	14760	0.737	0.0566	0.00133	30.9005	0.412752	0.0512	0.0010906	0.00113496
TARIM-D 57	0.012635	793	11674	0.5816	0.0401	0.000971	30.7828	0.425013	0.05152	0.000965077	0.00153016
TARIM-D 58	0.01524	958	13880	0.702	0.065	0.001684	30.9552	0.427827	0.05268	0.00108656	0.00296276
TARIM-D 59	0.01061	700	9789	0.4891	0.0918	0.002059	30.7287	0.416824	0.0538	0.00137809	0.00434595
TARIM-D 60	0.01668	1001	15320	0.77	0.0785	0.00163	30.7647	0.424719	0.04993	0.000827176	-0.000433484
Session 6 2022-11-08 TARIM-E 75 μm 10 Hz 3 J·cm-2
TARIM-E 01	0.00258471	231.645	4236.13	0.285885	-0.000565122	3.92573e-05	30.3906	0.821655	0.0515431	0.00177506	0.00155864
TARIM-E 02	0.00142462	127.075	2329.85	0.157622	0.000307439	-7.63486e-07	30.6046	0.848005	0.0516565	0.0025834	0.00169872
TARIM-E 03	0.00153377	142.983	2526.17	0.16975	5.63146e-06	6.93116e-07	30.1883	0.85672	0.0532949	0.00287452	0.00372219
TARIM-E 04	0.00178269	159.282	2889.88	0.19736	-0.0001706	3.95565e-05	30.7555	0.853958	0.0520109	0.00218948	0.00213637
TARIM-E 05	0.00260461	224.9	4199.17	0.28844	-0.000212841	8.40441e-05	30.9048	0.82863	0.0502534	0.00178503	-3.40273e-05
TARIM-E 06	0.00279347	229.683	4559.67	0.309443	0.000724	3.33304e-05	30.4853	0.818931	0.0474728	0.00167699	-0.00346807
TARIM-E 07	0.00136505	115.601	2201.25	0.151254	0.00150282	5.42761e-05	30.9038	0.871748	0.0495513	0.00287332	-0.000901149
TARIM-E 08	0.0063304	534.707	10200.1	0.701613	-0.00178942	0.000198472	30.8225	0.815628	0.049412	0.00101362	-0.00107326
TARIM-E 09	0.00212424	206.538	3470.34	0.235901	0.00277019	0.000312336	30.4862	0.839926	0.0562906	0.00218651	0.00742182
TARIM-E 10	0.00292332	267.3	4785.45	0.324821	0.00116775	0.00027717	30.3825	0.822	0.0527364	0.00165938	0.00303242
TARIM-E 11	0.00271754	259.164	4442.77	0.302145	0.00162072	0.000457352	30.3439	0.812427	0.0550862	0.00193556	0.00593435
TARIM-E 12	0.00159355	162.339	2589.7	0.17731	-0.000345327	0.000376116	30.3752	0.86268	0.0595892	0.00255754	0.0114955
TARIM-E 13	0.00138458	144.472	2290.78	0.154199	-0.00019482	0.000458666	30.0908	0.858839	0.0592377	0.00283566	0.0110614
TARIM-E 14	0.00311356	287.826	5045.33	0.347124	0.00340974	0.000455226	30.6463	0.824593	0.0538216	0.00166884	0.00437261
TARIM-E 15	0.00257475	245.971	4184.82	0.287403	0.00120849	0.000517508	30.4914	0.817738	0.0554622	0.00191024	0.00639872
TARIM-E 16	0.00135746	152.219	2231.48	0.151741	0.000487828	0.000612657	30.2331	0.852498	0.0644986	0.00331667	0.0175587
TARIM-E 17	0.00182677	185.427	2967.12	0.20745	0.00133342	0.000424088	30.3109	0.841419	0.0589068	0.00204738	0.0106529
TARIM-E 18	0.00164198	169.167	2667.59	0.187008	0.00190943	0.000405135	30.5079	0.842918	0.0592131	0.00266156	0.0110311
TARIM-E 19	0.00382973	346.558	6194.73	0.437391	0.0024522	0.00046327	30.4501	0.814306	0.0526716	0.00136455	0.00295234
TARIM-E 20	0.00196855	192.22	3198.1	0.22547	0.0017668	0.000427328	30.3022	0.829356	0.0566153	0.00228318	0.00782284
TARIM-E 21	0.00181217	183.489	2977.27	0.208159	0.00159663	0.000538833	29.9073	0.820986	0.0581636	0.00226423	0.00973501
TARIM-E 22	0.00138811	135.17	2263.58	0.159904	-0.000938982	0.000497334	30.2817	0.843959	0.056429	0.00290514	0.00759273
TARIM-E 23	0.00138242	144.336	2271.9	0.159698	-8.12572e-05	0.000498835	29.9465	0.852239	0.0593922	0.00282665	0.0112523
TARIM-E 24	0.00139896	132.14	2281	0.162053	-5.66983e-05	0.000470701	30.1664	0.843566	0.0545877	0.0027573	0.00531876
TARIM-E 25	0.00116609	123.231	1916.8	0.13729	0.000129971	0.000333297	30.1232	0.856742	0.0606639	0.00349124	0.0128228
TARIM-E 26	0.00227223	189.229	3644.07	0.267976	0.00175728	0.000200341	30.9214	0.831044	0.0486446	0.00182621	-0.00202089
TARIM-E 27	0.00119642	110.512	1926.78	0.141296	-0.000484616	0.000276565	30.9263	0.888809	0.0543239	0.00319084	0.00499302
TARIM-E 28	0.00108212	103.608	1764.87	0.127948	0.000899206	0.000318929	30.4999	0.903538	0.0559294	0.00349155	0.00697573
TARIM-E 29	0.00203694	169.024	3263.35	0.241077	-0.000402936	0.000281607	30.9526	0.851065	0.0483409	0.00198347	-0.00239597
TARIM-E 30	0.00213508	176.428	3407.08	0.252868	0.000241264	0.000258564	31.0972	0.853953	0.0487529	0.00208841	-0.00188726
TARIM-E 31	0.00275369	246.487	4442.91	0.326276	0.000971579	0.000346273	30.6507	0.828218	0.0524611	0.00173812	0.00269241
TARIM-E 32	0.00228478	191.611	3738.69	0.270762	0.000826251	0.000254517	30.1704	0.827596	0.0483854	0.00197411	-0.0023411
TARIM-E 33	0.00271858	231.342	4342.02	0.320009	0.000979997	0.000188729	30.3562	0.812914	0.0504297	0.00176656	0.000183648
TARIM-E 34	0.00235429	195.291	3751.66	0.276602	-0.000454194	0.000161097	30.4388	0.822229	0.0490492	0.00173416	-0.00152121
TARIM-E 35	0.00230185	192.77	3683.68	0.269926	0.00161154	0.000324035	30.3368	0.823317	0.0493816	0.00192387	-0.00111081
TARIM-E 36	0.00131086	101.469	2104.14	0.153412	0.000655086	0.000236707	30.0492	0.82498	0.0459698	0.00273228	-0.00532426
TARIM-E 37	0.00313901	256.312	4963.72	0.366614	0.00147515	0.000292719	30.5822	0.802643	0.0488044	0.0016597	-0.0018236
TARIM-E 38	0.00162259	139.848	2570.53	0.189111	0.00127016	0.000302499	30.397	0.830212	0.0513685	0.00262243	0.00134303
TARIM-E 39	0.00550189	464.235	8784.68	0.639889	0.00138785	0.000409578	30.2901	0.802146	0.0497446	0.00117975	-0.000662422
TARIM-E 40	0.00296521	244.14	4737.83	0.344146	0.00119815	0.000372072	30.2653	0.814333	0.0482916	0.00157512	-0.00245693
Session 7 2022-11-08 TARIM-F 75μm 10 Hz 3 J·cm-2
TARIM-F 01	0.0027019	363.183	4508.1	0.30971	0.0281998	0.00200901	29.7015	0.820438	0.0747717	0.0032922	0.030246
TARIM-F 02	0.00306016	259.682	4937.32	0.350313	0.031467	0.000796492	30.7144	0.821375	0.049547	0.00157967	-0.000906436
TARIM-F 03	0.00174319	169.011	2910	0.199332	0.0162958	0.000698956	30.0242	0.830307	0.0555874	0.00249126	0.00655337
TARIM-F 04	0.00230719	197.376	3667.73	0.263579	0.0057746	0.000494741	31.0219	0.839506	0.0506709	0.00190906	0.000481553
TARIM-F 05	0.00357102	312.057	5767.75	0.407627	0.0258816	0.000886933	31.1108	0.821906	0.050953	0.00163768	0.000829905
TARIM-F 06	0.00456791	367.02	7227.15	0.521092	0.0426851	0.00106187	31.3695	0.827081	0.0477508	0.00126311	-0.0031248
TARIM-F 07	0.00323093	268.733	5211.69	0.368397	0.0231053	0.000748581	30.7125	0.825161	0.0483863	0.00160513	-0.00234001
TARIM-F 08	0.00259059	212.414	4123.48	0.295289	0.0216525	0.000678377	30.9874	0.842013	0.0484374	0.00164292	-0.00227687
TARIM-F 09	0.00260221	244.955	4199.42	0.297382	0.00648883	0.000506829	29.6984	0.805523	0.0549831	0.00193593	0.00580711
TARIM-F 10	0.00233724	232.222	3833.36	0.267367	0.0176148	0.000832893	29.3996	0.786447	0.0570672	0.0019764	0.00838097
TARIM-F 11	0.00218684	216.034	3625.42	0.250414	0.0252651	0.000880511	28.9035	0.791066	0.0558073	0.00198115	0.00682492
TARIM-F 12	0.000737912	79.792	1157.12	0.0846873	0.00857136	0.000549931	30.1665	0.972475	0.0654384	0.00586943	0.0187194
TARIM-F 13	0.00191102	191.59	3180.73	0.219613	0.00959495	0.000670297	29.2244	0.786769	0.058098	0.00233522	0.00965397
TARIM-F 14	0.00167189	184.919	2746.01	0.192371	0.0108437	0.000906598	29.1886	0.803664	0.063089	0.00260166	0.0158179
TARIM-F 15	0.00371739	330.12	6000.43	0.428296	0.0309107	0.00111101	29.8406	0.786808	0.0518542	0.0015131	0.00194294
TARIM-F 16	0.000272067	41.198	456.104	0.03166	0.00563896	0.000355157	29.5544	1.31516	0.0861607	0.0110265	0.0443113
TARIM-F 17	0.000248478	33.3681	418.049	0.0289551	0.00403167	0.000346094	29.5921	1.27515	0.0760551	0.0114772	0.031831
TARIM-F 18	0.00217267	195.301	3453.61	0.253489	0.00480762	0.000474092	30.497	0.831049	0.053006	0.00209007	0.00336539
TARIM-F 19	0.00277912	625.783	4810.94	0.324603	0.0177959	0.00483162	28.2134	0.778648	0.120597	0.00520338	0.0868398
TARIM-F 20	0.000504718	46.09	839.562	0.0590107	0.0120935	0.000566224	29.6759	0.950413	0.0515306	0.00616544	0.00154329
TARIM-F 21	0.000634078	52.6107	1020.67	0.0741957	0.0145883	0.000634981	30.2764	0.937382	0.0489867	0.00506868	-0.00159849
TARIM-F 22	0.00049295	51.2113	777.385	0.0577204	0.00505254	0.000467759	30.5125	1.12139	0.0609761	0.00689786	0.0132085
TARIM-F 23	0.00207249	734.688	3167.83	0.242796	0.00870809	0.000713869	31.1987	1.35528	0.0546583	0.00615955	0.00540591
TARIM-F 24	0.00285158	233.893	4503.78	0.333206	0.0272836	0.000634545	30.0229	0.80605	0.0488732	0.00175652	-0.00173863
TARIM-F 25	0.000284004	115.187	555.272	0.0331463	0.00353669	0.00123865	25.1706	1.25569	0.186651	0.0172199	0.168416
TARIM-F 26	0.00256846	205.214	4134.84	0.299382	0.0221834	0.000529461	29.8945	0.811832	0.0468533	0.00176226	-0.00423315
TARIM-F 27	0.0013562	153.971	2359.54	0.157866	0.0149418	0.000840041	27.6761	0.786004	0.0611094	0.00311033	0.013373
TARIM-F 28	0.00156683	120.209	2460.31	0.182116	0.00777316	0.000306602	30.4371	0.848825	0.0459411	0.00248587	-0.00535971
TARIM-F 29	0.00315662	502.833	4938.7	0.366308	0.0244263	0.00156446	31.5142	1.43852	0.0481375	0.00173498	-0.00264726
TARIM-F 30	0.00517244	571.692	8407.89	0.599263	0.0387227	0.00249579	29.6218	0.757768	0.0638216	0.00293577	0.0167227
TARIM-F 31	0.00103908	72.0156	1644.11	0.120179	0.0109327	0.000328986	30.6317	0.86741	0.0411002	0.0029149	-0.0113383
TARIM-F 32	0.00331843	274.4	5255.87	0.379399	0.0234689	0.000511971	30.7101	0.812793	0.0485098	0.00149727	-0.00218738
TARIM-F 33	0.00154087	147.193	2469.23	0.17594	0.0105014	0.000554672	30.3997	0.845018	0.0561585	0.00288033	0.00725866
TARIM-F 34	0.00336771	274.262	5311.4	0.38412	0.0203488	0.000581363	30.4597	0.824596	0.0490078	0.00159011	-0.0015724
TARIM-F 35	0.00107032	109.52	1724.46	0.121967	0.01601	0.000701645	30.2498	0.85518	0.0599389	0.00388844	0.0119275
TARIM-F 36	0.00255421	217.98	4119.97	0.290844	0.0271225	0.000853968	30.0921	0.816442	0.0497488	0.00179012	-0.000657286
TARIM-F 37	0.00217737	189.596	3487.62	0.247794	0.0171569	0.00066271	30.205	0.815167	0.0511975	0.00178302	0.00113183
TARIM-F 38	0.00361234	307.903	5713.35	0.410951	0.0214018	0.000824297	30.3727	0.810564	0.0505018	0.00140325	0.000272694
TARIM-F 39	0.00225274	204.075	3605.87	0.256239	0.015525	0.000729815	29.89	0.834403	0.0536022	0.00208498	0.00410162
Session 8 2022-11-08 TARIM-G 75 μm 10 Hz 3 J·cm-2
TARIM-G 01	0.00145876	145.882	2236.35	0.166491	0.00669784	0.00048701	30.7817	0.940326	0.0608528	0.00274823	0.0130562
TARIM-G 02	0.00144678	183.565	2358.74	0.16555	0.00794177	0.000944839	29.3293	0.804562	0.0724165	0.00614052	0.0273373
TARIM-G 03	0.00455917	390.415	7156.24	0.522938	0.00704186	0.000479325	30.7236	0.809435	0.0513389	0.00129118	0.00130654
TARIM-G 04	0.00400483	352.577	6404.12	0.460395	0.0146408	0.000683049	30.0394	0.81887	0.0518749	0.00133216	0.0019685
TARIM-G 05	0.00264654	234.495	4217.36	0.304911	0.00901742	0.000478014	30.2407	0.822514	0.0522823	0.00176202	0.00247166
TARIM-G 06	0.00164227	148.272	2632.81	0.189586	0.00475205	0.000531943	29.9654	0.828795	0.0530207	0.00252636	0.00338349
TARIM-G 07	0.00216717	188.771	3453.07	0.250611	0.0102859	0.000634184	30.1436	0.828958	0.0515775	0.00181392	0.00160122
TARIM-G 08	0.00368176	314.069	5835.5	0.426341	0.0213725	0.000800068	30.1585	0.814517	0.0506142	0.00133885	0.000411472
TARIM-G 09	0.00636565	537.707	9949.73	0.736134	0.0254749	0.000653449	29.8788	0.790418	0.050923	0.00106693	0.000792911
TARIM-G 10	0.00646459	516.731	10099.2	0.746448	0.0198391	0.000525499	29.8484	0.794765	0.0481144	0.0010604	-0.00267569
TARIM-G 11	0.00725035	583.895	11296	0.835826	0.0477803	0.00104795	29.9261	0.791969	0.0485978	0.000949754	-0.00207878
TARIM-G 12	0.0127768	1034	19981.4	1.47034	0.0964346	0.0019809	29.802	0.787191	0.0485984	0.00080439	-0.00207803
TARIM-G 13	0.0051691	412.188	8054.58	0.593741	0.0282329	0.000581903	29.9674	0.786321	0.0482532	0.00107949	-0.00250426
TARIM-G 14	0.0002693	21.7126	414.933	0.030873	0.00485406	0.000202313	30.4722	1.41154	0.0482903	0.0109738	-0.00245852
TARIM-G 15	0.00294449	237.001	4545.72	0.336892	0.0172977	0.00044703	30.3192	0.823171	0.0491692	0.00161894	-0.00137307
TARIM-G 16	0.00486376	1048.36	8315.52	0.555378	0.0304149	0.00783779	27.403	0.728957	0.11836	0.00210319	0.0840769
TARIM-G 17	0.00213389	181.494	3342.02	0.240924	0.0100447	0.000219652	30.1674	0.820097	0.0511253	0.00203816	0.00104271
TARIM-G 18	0.000724826	69.9576	1121.67	0.0817533	0.00291251	0.000125135	30.7488	0.955922	0.0590598	0.00457929	0.0108418
TARIM-G 19	0.00131427	1689.52	3781.72	0.148125	0.00435789	0.0171215	16.8686	0.580178	0.405435	0.0143671	0.438614
TARIM-G 20	0.000689756	170.997	1294.51	0.0776929	0.0042533	0.00142028	22.208	1.38697	0.235083	0.0363447	0.22823
TARIM-G 21	0.00479242	406.015	7614.79	0.539639	0.0496442	0.0013199	29.7073	0.797479	0.0501882	0.00125882	-0.000114601
TARIM-G 22	0.000817102	79.5084	1294.88	0.0919951	0.00507833	0.000446746	28.6594	0.96959	0.058636	0.00501837	0.0103184
TARIM-G 23	0.00629805	584.756	9896.66	0.70914	0.0299109	0.00157447	30.0506	0.780856	0.0554111	0.00159127	0.00633564
TARIM-G 24	0.00638132	535.294	10031.9	0.71875	0.0342299	0.00106397	29.9264	0.789587	0.050244	0.00116365	-4.56476e-05
TARIM-G 25	0.00270678	1069.74	5107.53	0.307643	0.052919	0.00944019	25.739	1.1662	0.138774	0.0209579	0.109289
TARIM-G 26	0.00391025	375.166	6213.54	0.445326	0.035223	0.00129639	29.434	0.817282	0.0569118	0.00151774	0.00818901
TARIM-G 27	0.00780804	641.236	12234.9	0.890942	0.031816	0.000959636	29.8645	0.782039	0.0492128	0.000911596	-0.00131916
TARIM-G 28	0.00612688	762.88	9966.94	0.700461	0.0378826	0.00362488	28.7415	0.772952	0.0719885	0.00181476	0.0268087
TARIM-G 29	0.00403833	356.048	6416.87	0.462566	0.0761222	0.00186377	29.4594	0.78899	0.0520383	0.00135661	0.00217031
TARIM-G 30	0.0112153	965.02	17610.1	1.28702	0.108028	0.0028129	29.6889	0.784769	0.0512669	0.000948609	0.00121764
TARIM-G 31	0.00374132	338.889	5934.67	0.430111	0.0254029	0.000919046	29.6604	0.793284	0.053851	0.00152826	0.00440889
TARIM-G 32	0.00822173	696.216	12928.9	0.946706	0.0468999	0.00135841	29.8613	0.788901	0.050595	0.00102122	0.000387832
TARIM-G 33	0.00289626	255.618	4571.72	0.335695	0.0582968	0.00132361	30.4399	0.817827	0.0526177	0.00169989	0.00288577
TARIM-G 34	0.00840038	704.667	13045.6	0.973947	0.0746849	0.00198297	31.0173	0.810035	0.0506734	0.000996795	0.000484575
TARIM-G 35	0.00514601	443.004	8151.82	0.596727	0.0267176	0.000671078	30.6741	0.812926	0.0510496	0.00122128	0.000949267
TARIM-G 36	0.00654528	536.45	10131.3	0.759017	0.0373273	0.00100779	31.427	0.831758	0.0497307	0.00101326	-0.000679588
TARIM-G 37	0.000735656	74.8073	1224.9	0.0853043	0.0154385	0.000525254	29.3985	1.01054	0.0607735	0.00516056	0.0129582
TARIM-G 38	0.0119717	967.102	18527.3	1.38799	0.0991446	0.00210147	31.5855	0.815536	0.0491474	0.000777952	-0.00139995
TARIM-G 39	0.00493109	655.512	7826.82	0.571575	0.0254203	0.00341573	30.2381	0.837182	0.0794182	0.00213226	0.0359844
TARIM-G 40	0.00570029	474.105	8897.24	0.660522	0.0339265	0.000946592	31.3666	0.835233	0.0501558	0.0012029	-0.000154617
Session 9 2023-04-19 TARIM-E 90 μm 10 Hz 3 J·cm-2
TARIM-E 01	0.004328	559	8068	0.4619	0.0002	0.000285	29.538	0.489298	0.0511	0.00150889	0.00101146
TARIM-E 02	0.004361	534	8044	0.4656	0.0016	0.000188	29.8944	0.493362	0.0494	0.00130958	-0.00108803
TARIM-E 03	0.004315	534	7934	0.4608	0.0014	0.000194	29.9328	0.497129	0.0503	0.00121075	2.34649e-05
TARIM-E 04	0.004314	528	7931	0.461	0.001	0.000125	29.9328	0.488208	0.0497	0.00130969	-0.000717533
TARIM-E 05	0.004312	521	7875	0.4609	0.0022	0.000174	30.1343	0.494939	0.0493	0.00121033	-0.00121153
TARIM-E 06	0.003607	465	6581	0.3928	0.0002	0.000199	30.033	0.498992	0.0512	0.00140955	0.00113496
TARIM-E 07	0.003665	478.3	6663	0.3998	0.0013	0.00028	30.111	0.503418	0.0525	0.00141004	0.00274046
TARIM-E 08	0.003641	474.6	6563	0.3979	-0.0023	0.000324	30.3544	0.51529	0.0528	0.00141016	0.00311096
TARIM-E 09	0.003627	469	6530	0.3971	-0.0001	0.000287	30.4103	0.502859	0.0522	0.00140993	0.00236996
TARIM-E 10	0.00358	454.9	6414	0.3926	0.0014	7.8e-05	30.5699	0.502835	0.0509	0.00131016	0.000764463
TARIM-E 11	0.00338	421.6	5876	0.3853	-0.0003	0.000253	31.2583	0.519322	0.0524	0.00141001	0.00261696
TARIM-E 12	0.003488	427.5	6024	0.3985	0.0018	0.000408	31.3934	0.522143	0.0522	0.00140993	0.00236996
TARIM-E 13	0.003572	442	6170	0.409	-0.003	0.000305	31.4108	0.522386	0.0534	0.0015097	0.00385195
TARIM-E 14	0.003587	439	6241	0.4115	-0.0004	0.000356	31.108	0.519621	0.0523	0.00150931	0.00249346
TARIM-E 15	0.003611	431.8	6269	0.4152	-0.002	0.000227	31.1581	0.520798	0.0512	0.00140955	0.00113496
TARIM-E 16	0.004165	487	7250	0.4955	0.0007	0.000292	30.7633	0.500406	0.0526	0.00131085	0.00286396
TARIM-E 17	0.004315	498	7462	0.514	0.002	0.000356	30.8448	0.514534	0.0524	0.00121166	0.00261696
TARIM-E 18	0.004313	492	7422	0.5145	0.0021	0.000372	31.0335	0.508479	0.052	0.00131061	0.00212296
TARIM-E 19	0.004211	485	7234	0.5029	0.0015	0.000407	31.0917	0.512846	0.0527	0.00141012	0.00298746
TARIM-E 20	0.004189	468	7285	0.5008	0.0027	0.000242	30.6666	0.514505	0.0502	0.00130989	-0.000100035
TARIM-E 21	0.004285	475.8	7375	0.5181	0.0003	0.00026	30.7714	0.507005	0.0512	0.00111213	0.00113496
TARIM-E 22	0.004407	492	7589	0.533	0.0021	0.000355	30.6421	0.507476	0.0519	0.00121144	0.00199946
TARIM-E 23	0.004507	492	7742	0.545	0.0026	0.000391	30.7633	0.506442	0.0509	0.001211	0.000764463
TARIM-E 24	0.004514	488	7715	0.5461	0.0035	0.000275	30.8774	0.518891	0.0507	0.00121092	0.000517463
TARIM-E 25	0.004467	482	7649	0.5404	-0.0011	0.000233	30.8203	0.507691	0.0505	0.00121083	0.000270464
TARIM-E 26	0.004275	478	7425	0.5229	0.0017	0.000252	30.2054	0.499078	0.0507	0.00121092	0.000517463
TARIM-E 27	0.006612	675	11213	0.8094	0.0016	0.000293	30.7959	0.490562	0.0498	0.000914	-0.000594033
TARIM-E 28	0.00643	673	10880	0.7883	0	0.000449	30.8448	0.501979	0.0509	0.00101318	0.000764463
TARIM-E 29	0.004378	492	7555	0.5377	0.0016	0.000254	30.3707	0.502306	0.0514	0.00131036	0.00138196
TARIM-E 30	0.004345	484	7547	0.5343	0.0025	0.000275	30.1576	0.495267	0.0505	0.00121083	0.000270464
TARIM-E 31	0.003925	426.5	6689	0.4964	0.0015	0.000202	30.521	0.505324	0.05	0.00121062	-0.000347034
TARIM-E 32	0.004051	464	6883	0.5131	0.0029	0.000485	30.5455	0.518928	0.053	0.00121193	0.00335796
TARIM-E 33	0.004152	460	6958	0.5266	0.0014	0.00039	30.9601	0.51055	0.0526	0.00131085	0.00286396
TARIM-E 34	0.004308	524	7350	0.5471	0.0041	0.0009	30.4895	0.501261	0.0578	0.00171003	0.00928594
TARIM-E 35	0.004396	476.1	7335	0.559	0.0001	0.000449	31.0416	0.518703	0.052	0.00111251	0.00212296
TARIM-E 36	0.004386	456.4	7340	0.5631	-0.0002	0.00027	30.6584	0.514393	0.0506	0.00111185	0.000393964
TARIM-E 37	0.004377	464.7	7332	0.5616	-0.0013	0.000345	30.6666	0.501571	0.0519	0.00131057	0.00199946
TARIM-E 38	0.004467	468.8	7433	0.5728	0.0004	0.000274	30.8855	0.512262	0.0515	0.00121126	0.00150546
TARIM-E 39	0.003577	456	6040	0.4587	0.0016	0.00118	30.4581	0.513636	0.0611	0.00200953	0.0133614
TARIM-E 40	0.003602	430	6048	0.4616	0.0014	0.000803	30.6177	0.513832	0.0574	0.00161051	0.00879194
Session1 2021-11-10 DuffBrown 130 μm 10 Hz 2 J·cm-2
DuffBrown 01	0.3829	84300	323100	44.73	0.1422	0.767	67.4259	1.94699	0.2668	0.00590603	0.2674
DuffBrown 02	0.3334	92200	305400	38.93	0.1109	0.862	62.6474	1.41626	0.3109	0.00271784	0.321864
DuffBrown 03	0.2552	100000	278400	29.75	0.1207	0.957	52.4354	1.272	0.3671	0.00391724	0.39127
DuffBrown 04	0.2807	65650	239300	32.71	0.0995	0.6066	67.1436	1.47759	0.282	0.00291368	0.286172
DuffBrown 05	0.357	86400	307900	41.5	0.1133	0.8	65.3458	1.96563	0.2874	0.00690598	0.292841
DuffBrown 06	0.3509	134400	372800	40.8	0.2	1.283	53.2058	1.40835	0.3706	0.00441558	0.395593
DuffBrown 07	0.3076	129300	343000	35.66	0.0769	1.25	51.1454	1.19011	0.385	0.0049151	0.413377
DuffBrown 08	0.4178	166000	449000	48.42	0.1517	1.58	52.8302	2.16969	0.3705	0.0094073	0.395469
DuffBrown 09	0.338	68360	271000	39.1	0.1037	0.626	69.9901	1.66649	0.261	0.00301133	0.260237
DuffBrown 10	0.3188	171400	401900	36.87	0.0638	1.683	44.3732	1.44541	0.4394	0.00641507	0.480561
DuffBrown 11	0.2323	76700	229800	26.82	0.0921	0.741	57.0738	1.27513	0.3445	0.00341741	0.363359
DuffBrown 12	0.1167	702000	1026000	13.47	0.0185	6.53	5.8168	0.353315	0.7003	0.00435665	0.802771
DuffBrown 13	0.2999	103190	298800	34.57	0.1047	0.999	56.284	1.21324	0.355	0.00321963	0.376327
DuffBrown 14	0.2508	487400	799000	28.91	0.0497	4.694	17.6627	0.448918	0.6281	0.00171887	0.713604
Session 2 2021-11-10 DuffBrown 130 μm 6 Hz 6 J·cm-2
DuffBrown 01	0.3735	149700	397100	33.67	0.1033	1.082	55.3112	1.504	0.3864	0.00643768	0.415106
DuffBrown 02	0.2558	597000	955000	23.09	0.0376	4.661	15.4761	0.546481	0.642	0.00205558	0.730771
DuffBrown 03	0.4609	151400	456600	42.19	0.1191	1.144	58.9636	1.58712	0.3396	0.00434323	0.357308
DuffBrown 04	0.3454	400400	735300	31.67	0.1165	3.22	26.9822	0.933458	0.5602	0.00335511	0.629748
DuffBrown 05	0.4233	171100	456400	39.97	0.1069	1.343	53.7774	1.42291	0.3837	0.00524567	0.411771
DuffBrown 06	0.08736	787200	1123600	8.279	0.0214	6.175	4.45347	0.120596	0.72308	0.00150719	0.830904
DuffBrown 07	0.4208	126800	397600	41.22	0.1134	0.979	60.6639	1.65093	0.3306	0.00305845	0.346193
DuffBrown 08	0.4418	129800	415900	43.38	0.1617	0.997	61.0818	1.59223	0.3231	0.00344938	0.33693
DuffBrown 09	0.4564	156200	464700	44.93	0.1502	1.231	55.7084	1.53697	0.3478	0.00228734	0.367435
DuffBrown 10	0.4301	128000	410900	42.26	0.1543	0.995	59.5006	1.54783	0.3225	0.00423993	0.336189
DuffBrown 11	0.4843	164500	490200	45.96	0.1556	1.322	55.7084	1.58187	0.3479	0.00228739	0.367558
DuffBrown 12	0.4788	106100	399900	45.21	0.1121	0.82	67.5658	1.72872	0.2743	0.00353465	0.276663
DuffBrown 13	0.1926	945700	1386000	17.6	0.0313	7.433	7.80128	0.206761	0.70671	0.00159367	0.810687
DuffBrown 14	0.4398	143300	434800	39.9	0.16	1.169	56.3406	1.71125	0.3391	0.00414519	0.35669
Session 3 2022-04-26 DuffBrown 75 μm 10 Hz 3 J·cm-2
DuffBrown 01	0.07702	52700	101700	10.04	0.0504	0.454	43.1162	1.88786	0.446	0.0160804	0.488712
DuffBrown 02	0.07404	44500	90200	9.62	0.0788	0.38	47.3277	2.13176	0.417	0.0160703	0.452897
DuffBrown 03	0.0866	37200	88000	10.92	0.1051	0.35	55.2734	2.05537	0.366	0.00969	0.389912
DuffBrown 04	0.10158	42900	99710	12.63	0.1111	0.376	57.1938	2.17324	0.365	0.0130662	0.388677
DuffBrown 05	0.1096	60000	126400	13.58	0.1127	0.561	48.5995	2.11596	0.408	0.0130827	0.441782
DuffBrown 06	0.0951	48100	103100	11.78	0.1129	0.491	51.4011	2.00831	0.394	0.0101001	0.424492
DuffBrown 07	0.0634	29700	67400	7.89	0.0942	0.296	49.0263	2.13047	0.3848	0.00851346	0.41313
DuffBrown 08	0.0483	78200	116200	6	0.0381	0.866	22.6455	0.915299	0.5814	0.00597836	0.65593
DuffBrown 09	0.1229	47000	122800	15.37	0.1265	0.486	54.5686	1.91597	0.3305	0.006608	0.346069
Session 4 2022-05-03 DuffBrown 130 μm 10 Hz 3 J·cm-2
DuffBrown 01	0.3394	70600	171000	16.4	0.1396	0.4185	60.3525	1.03918	0.3265	0.0051636	0.341129
DuffBrown 02	0.3483	82500	188900	16.83	0.0907	0.483	55.5612	1.13527	0.3447	0.00634876	0.363606
DuffBrown 03	0.2551	59400	134900	12.33	0.0683	0.3569	57.3863	0.933574	0.3462	0.00473228	0.365459
DuffBrown 04	0.304	58020	149510	14.69	0.1111	0.3439	61.4887	1.00604	0.3068	0.00351807	0.3168
DuffBrown 05	0.1313	584100	654400	6.35	0.043	3.436	5.63954	0.26066	0.7033	0.00666525	0.806476
DuffBrown 06	0.000531	8520	8910	0.026	0.0003	0.0521	1.60969	0.10198	0.7463	0.00994894	0.859581
DuffBrown 07	0.001399	100800	106200	0.068	0.0006	0.648	0.380669	0.0238889	0.7445	0.00708197	0.857358
DuffBrown 08	0.2625	117700	194000	12.7	0.159	0.647	40.6927	1.04857	0.4689	0.0101612	0.516993
DuffBrown 09	0.367	58800	166600	17.804	0.1101	0.3488	64.9816	1.13567	0.2747	0.00355485	0.277157
DuffBrown 10	0.001008	6510	7230	0.0492	-0.0003	0.04327	3.92607	0.149722	0.7033	0.00882415	0.806476
DuffBrown 11	0.000597	11770	12610	0.02924	0.0008	0.079	1.39453	0.0378462	0.7285	0.00807276	0.837598
DuffBrown 12	0.001552	94800	99500	0.0756	0.0008	0.627	0.46619	0.0120507	0.7442	0.00703111	0.856987
DuffBrown 13	0.3856	54100	161200	18.71	0.0901	0.3166	70.3447	1.13774	0.2613	0.00432886	0.260608
DuffBrown 14	0.2926	68980	153130	14.202	0.1118	0.4248	55.8919	0.918435	0.3519	0.00415226	0.372498
Session 5 2022-05-03 DuffBrown 130 μm 10 Hz 3 J·cm-2
DuffBrown 01	0.283	71700	165300	11.864	0.0993	0.3638	51.8298	0.772195	0.3434	0.00433128	0.362001
DuffBrown 02	0.2908	80700	168900	12.49	0.1043	0.4232	51.3887	0.738549	0.3788	0.0049048	0.40572
DuffBrown 03	0.3206	63360	160830	14	0.089	0.3364	59.2979	0.78511	0.3115	0.00320165	0.322605
DuffBrown 04	0.2812	68300	159300	12.37	0.0903	0.3713	52.5566	0.724293	0.3394	0.00329889	0.357061
DuffBrown 05	0.2935	69080	158000	13.02	0.0673	0.3799	54.9952	0.732598	0.3471	0.00335627	0.36657
DuffBrown 06	0.2767	96500	182000	12.286	0.0703	0.5444	44.9492	0.873811	0.4209	0.00536652	0.457713
DuffBrown 07	0.3185	74400	170000	14.25	0.0716	0.414	55.9666	0.925031	0.3478	0.00714071	0.367435
DuffBrown 08	0.3031	70680	164000	13.572	0.1006	0.3937	54.7266	0.748231	0.3419	0.00347213	0.360148
DuffBrown 09	0.2924	71700	161100	13.193	0.1163	0.4025	53.6409	0.713376	0.3523	0.00423879	0.372992
DuffBrown 10	0.2859	60040	146600	12.91	0.0909	0.3368	57.5338	0.746735	0.3247	0.00359268	0.338906
DuffBrown 11	0.26082	57300	137600	11.871	0.0841	0.3194	55.8515	0.903824	0.3296	0.0057314	0.344958
DuffBrown 12	0.207	56600	122300	9.428	0.0535	0.327	50.0632	0.805596	0.3678	0.00499837	0.392135
DuffBrown 13	0.2521	75500	155600	11.571	0.0977	0.44	47.3789	0.799437	0.3847	0.00580797	0.413006
DuffBrown 14	0.281	108400	199400	12.91	0.0946	0.639	41.3731	0.942099	0.4268	0.0066724	0.465
DuffBrown 15	0.3171	80200	171400	14.636	0.1026	0.46	54.2351	1.07864	0.3669	0.00830759	0.391023
DuffBrown 16	0.3028	57300	146700	13.986	0.0896	0.3277	60.4825	0.909104	0.3093	0.00512561	0.319888
Session 6-8 2022-11-08 DuffBrown 75 μm 10 Hz 3 J·cm-2
DuffBrown 01	0.145992	29903.8	107795	16.1384	0.0560629	0.275486	67.7776	1.86067	0.264491	0.0041442	0.264548
DuffBrown 02	0.18179	44492.5	144154	20.1013	0.0911296	0.419086	63.6176	1.61611	0.291447	0.00375032	0.29784
DuffBrown 03	0.176574	44251.4	140893	19.5936	0.0898663	0.422106	62.8978	1.62725	0.296752	0.00331495	0.30439
DuffBrown 04	0.155681	37706.6	120673	17.2814	0.0729928	0.359326	64.7879	1.68128	0.294975	0.00347325	0.302196
DuffBrown 05	0.220112	40634.9	154608	24.8642	0.0779955	0.38098	71.3468	1.88673	0.247459	0.00261827	0.243514
DuffBrown 06	0.156217	31343.6	114131	17.6936	0.0523344	0.29852	68.682	1.78469	0.258658	0.00334549	0.257344
DuffBrown 07	0.167988	35447.1	123047	19.7024	0.0757221	0.351953	68.1049	1.78803	0.270485	0.00292239	0.271952
DuffBrown 08	0.132771	24857.1	94698.8	15.6037	0.0450879	0.242654	69.9729	1.79151	0.248452	0.00383524	0.24474
DuffBrown 09	0.125147	30545	98140.7	14.7771	0.0617263	0.311528	62.6543	1.68872	0.290788	0.00423501	0.297025
DuffBrown 10	0.129317	24890.1	92283.6	15.2469	0.0421036	0.247107	68.0429	1.93747	0.255179	0.00344475	0.253049
DuffBrown 11	0.168929	35330.3	122315	19.4201	0.0791852	0.349631	68.0334	1.7483	0.271463	0.00321512	0.273159
DuffBrown 12	0.156943	31267.3	113708	18.0141	0.0684004	0.305194	68.1729	1.80198	0.258266	0.00324955	0.25686
DuffBrown 13	0.145945	30219.7	108307	16.6536	0.0577739	0.296195	64.921	1.70686	0.26195	0.00354651	0.26141
DuffBrown 14	0.125539	38323.2	108095	14.3352	0.0425616	0.392661	56.1458	1.56959	0.330075	0.00724813	0.345545
DuffBrown 15	0.0685874	42285	86121.3	7.95888	0.0714783	0.465962	37.9443	1.22818	0.463075	0.00576658	0.509799
DuffBrown 16	0.101545	45058	105151	11.8006	0.0629198	0.485871	46.4562	1.41204	0.403978	0.00621545	0.436814
DuffBrown 17	0.106938	43771.4	106113	12.5179	0.0491308	0.475484	47.592	1.70199	0.389683	0.00571393	0.419161
DuffBrown 18	0.102312	38161.7	96160.7	11.9664	0.0430935	0.412761	51.2306	1.37169	0.372498	0.00483065	0.397936
DuffBrown 19	0.0962309	47782.5	105767	11.0336	0.0552559	0.514814	44.112	1.3481	0.425057	0.0053417	0.462847
DuffBrown 20	0.134701	37858.1	110208	15.4211	0.0473544	0.390713	59.5394	1.61188	0.321738	0.00594473	0.335248
DuffBrown 21	0.0848917	49367.5	102746	9.68241	0.0533617	0.528986	39.7501	1.20806	0.455954	0.00585963	0.501004
DuffBrown 22	0.117536	50243.6	119286	13.4218	0.0542784	0.526238	47.7603	1.84016	0.395024	0.00829199	0.425757
DuffBrown 23	0.13797	31004.7	103741	16.1504	0.0754421	0.315709	65.3895	1.69121	0.28061	0.003482	0.284456
DuffBrown 24	0.0896673	36947	91268.5	10.5192	0.0603636	0.396589	48.6922	1.36416	0.380168	0.00558247	0.407409
DuffBrown 25	0.116953	31290.9	93374.2	13.8757	0.0719541	0.330691	60.299	1.63996	0.313844	0.00437856	0.325499
DuffBrown 26	0.134775	27798.2	98583.2	15.974	0.0669838	0.282834	66.2222	1.81834	0.265935	0.00331459	0.266331
DuffBrown 27	0.13715	30591.5	102958	15.9022	0.0795447	0.309578	65.025	1.65381	0.279718	0.00432977	0.283354
DuffBrown 28	0.129165	35926.2	106446	14.9517	0.0943912	0.371	59.3927	1.53017	0.31577	0.00502652	0.327878
DuffBrown 29	0.134323	30782.9	100281	15.243	0.0720394	0.307512	63.9364	1.78097	0.287474	0.00438138	0.292932
DuffBrown 30	0.136422	31512.7	102839	15.4595	0.075234	0.313605	63.2777	1.712	0.287771	0.00523776	0.2933
DuffBrown 31	0.141267	28694.5	100329	16.3713	0.0656374	0.292483	66.7309	1.73842	0.268762	0.00404666	0.269823
DuffBrown 32	0.124839	35705.9	103754	14.4539	0.0959582	0.376793	57.0556	1.52387	0.322825	0.00404465	0.336591
DuffBrown 33	0.120174	38126.2	109979	13.5834	0.0725385	0.394846	52.6429	1.95506	0.326189	0.00490598	0.340746
DuffBrown 34	0.132393	31104.4	100163	14.9941	0.0478258	0.31739	62.0701	1.78078	0.291964	0.00432781	0.298478
DuffBrown 35	0.144077	25601	96992.6	16.6827	0.0445441	0.255674	72.1621	1.85831	0.24801	0.00422071	0.244194
DuffBrown 36	0.0835455	29075.5	77223.6	9.67945	0.019905	0.310901	53.5105	1.83299	0.34326	0.0100387	0.361829
DuffBrown 37	0.154869	27208.7	104088	17.9389	0.0696638	0.271454	72.9997	1.99572	0.249054	0.00330102	0.245483
DuffBrown 38	0.130072	33139.3	101175	15.0596	0.0308972	0.346882	63.2059	1.91088	0.306674	0.00423996	0.316644
Session 9 2023-04-19 DuffBrown 90 μm 10 Hz 3 J·cm-2
DuffBrown 01	0.1338	42800	126100	14.3	0.0512	0.3593	57.4873	0.984818	0.314	0.00402736	0.325692
DuffBrown 02	0.0791	45200	100800	8.46	0.0311	0.3963	42.2146	0.79777	0.4134	0.00364829	0.448451
DuffBrown 03	0.1328	43500	127000	14.2	0.0361	0.369	56.6208	1.10205	0.3156	0.00539536	0.327668
DuffBrown 04	0.1198	29280	100700	12.82	0.0293	0.2414	63.6451	1.37257	0.2742	0.00497794	0.276539
DuffBrown 05	0.0869	27590	81300	9.3	0.0158	0.2349	57.3464	1.25565	0.3152	0.00628151	0.327174
DuffBrown 06	0.1393	36570	117800	15.28	0.0507	0.3259	63.4366	1.04961	0.2884	0.00229384	0.294076
DuffBrown 07	0.1111	66500	145400	12.22	0.0291	0.637	40.9672	1.06518	0.4249	0.0057627	0.462653
DuffBrown 08	0.07472	74700	138600	8.23	0.0307	0.701	28.6167	1.74281	0.494	0.011113	0.547991
DuffBrown 09	0.14785	36010	119500	16.315	0.0583	0.3244	66.4404	1.10735	0.2786	0.00419581	0.281973
DuffBrown 10	0.1165	32360	102400	12.88	0.0337	0.2767	60.9791	1.0154	0.2957	0.0032412	0.303092
DuffBrown 11	0.1187	36900	105900	13.66	0.0468	0.349	59.5756	1.16405	0.3213	0.00559528	0.334707
DuffBrown 12	0.1376	31690	110000	15.87	0.0442	0.2932	66.5161	1.31207	0.2675	0.00379773	0.268265
DuffBrown 13	0.146	35000	117600	16.87	0.0613	0.323	66.3274	1.13843	0.2746	0.00468318	0.277033
DuffBrown 14	0.1345	48620	128800	15.58	0.0466	0.472	55.2779	1.16914	0.3502	0.00405781	0.370399
DuffBrown 15	0.1121	27510	91600	13.01	0.0279	0.2584	64.9216	1.14406	0.2774	0.00439067	0.280491
DuffBrown 16	0.142	31220	109800	16.97	0.0594	0.2987	68.1513	1.12512	0.2634	0.00172059	0.263201
DuffBrown 17	0.1392	92900	187500	16.66	0.0478	0.962	38.823	1.78235	0.442	0.0120831	0.483772
DuffBrown 18	0.0932	243000	362000	11.163	0.0397	2.52	13.3568	0.955899	0.6013	0.00881263	0.680506
DuffBrown 19	0.0999	40300	100600	11.98	0.0321	0.4114	51.5124	1.10135	0.3742	0.00417539	0.400039
DuffBrown 20	0.1257	35110	107500	15.08	0.0476	0.3471	61.4939	1.21688	0.3038	0.00479949	0.313095
DuffBrown 21	0.1137	32670	97800	13.74	0.0661	0.3262	60.6926	0.997609	0.309	0.00354087	0.319517
DuffBrown 22	0.0795	27040	74840	9.61	0.0483	0.2756	55.4887	0.931765	0.3351	0.00328022	0.35175
DuffBrown 23	0.112	31580	95900	13.54	0.0476	0.3174	60.8521	1.0264	0.3055	0.00259147	0.315195
DuffBrown 24	0.1092	36900	100900	13.2	0.0513	0.375	56.0221	1.27088	0.3381	0.00501802	0.355455
DuffBrown 25	0.0637	34860	76600	7.71	0.0655	0.3662	38.5668	2.00361	0.428	0.0100934	0.466482
DuffBrown 26	0.1341	27650	100400	16.49	0.0235	0.2713	68.1117	1.49248	0.2582	0.0061557	0.256779
DuffBrown 27	0.12	32800	101600	14.78	0.0034	0.335	59.3625	1.81386	0.3049	0.00895332	0.314454
DuffBrown 28	0.1302	26970	99330	16.061	0.0606	0.2642	67.7938	1.15086	0.251	0.00526167	0.247887
DuffBrown 29	0.138	31560	107700	17.05	0.0653	0.3155	66.4404	1.10735	0.2701	0.0037023	0.271476
DuffBrown 30	0.109	22700	82500	13.48	0.0422	0.2239	68.071	1.12354	0.255	0.00244046	0.252827
DuffBrown 31	0.0866	104800	172200	11.011	0.0276	1.213	25.882	0.794853	0.5596	0.0054997	0.629007
DuffBrown 32	0.0408	149000	206000	5.2	-0.0011	1.73	9.02876	0.713312	0.647	0.0121773	0.736946
DuffBrown 33	0.1193	31030	96700	15.2	0.0758	0.3317	63.2479	0.994333	0.2965	0.00212373	0.30408
DuffBrown 34	0.13	28220	98690	16.59	0.0753	0.2969	67.5468	1.05792	0.2646	0.0027344	0.264683
DuffBrown 35	0.1137	23090	84590	14.52	0.0518	0.2411	68.8641	1.08372	0.2544	0.00253431	0.252086
DuffBrown 36	0.1259	31960	100800	16.07	0.0697	0.345	63.5065	1.05104	0.2929	0.00401105	0.299634
DuffBrown 37	0.1053	29680	88600	13.43	0.0543	0.3236	58.2933	1.4422	0.3181	0.00579018	0.330755
DuffBrown 38	0.126	24540	91100	16.06	0.0455	0.2565	70.1884	1.12856	0.2492	0.0026241	0.245664

## Sheet: PlotDat17
Source sheet	Table S3	51.1037	0.42	80.1867	0.0476741	39.8449	0.0493206	26.3983	0.0510497	19.6756	0.0528659	15.6423	0.0547743	12.9538	0.05678	11.0338	0.0588885	10	0.0603015	10	0.0601624	10	0.0604405	80.0812	0.0476113	10	0.788946	75.6426	0.42	81.1056	0.143	79.9254	0.179	80.5216	0.145	80.5215	0.132	86.9864	0.14	85.8725	0.158	89.339	0.122	86.1364	0.224	84.5288	0.123	80.5215	0.125
Plot name	Concordia15	74.1713	0.143	80.1825	0.0476947	39.8428	0.0493429	26.3969	0.0510737	19.6745	0.0528919	15.6414	0.0548024	12.9531	0.0568103	11.0331	0.0589212	10	0.0603015	10	0.0601624	10	0.0604405	39.7922	0.0492553	92.6841	0	75.5379	0.439197	81.011	0.157705	79.813	0.194108	80.4143	0.156684	80.4076	0.139453	86.8871	0.149669	85.7764	0.170288	89.2446	0.130863	86.0431	0.237497	84.4494	0.132669	80.4076	0.132453
Plot Type	1	71.6823	0.179	80.17	0.0477087	39.8365	0.0493581	26.3927	0.0510904	19.6714	0.0529101	15.639	0.0548222	12.951	0.0568318	11.0314	0.0589446	10.3408	0.0597647	10.3408	0.0596281	10.3408	0.0599014	26.3632	0.0509816			75.2248	0.458231	80.7299	0.17201	79.4788	0.208804	80.0955	0.168049	80.0688	0.146703	86.5919	0.159075	85.4906	0.182241	88.9637	0.139485	85.7656	0.250625	84.2134	0.142075	80.0688	0.139703
1st free col	181	72.6576	0.145	80.1503	0.0477147	39.8267	0.049365	26.3862	0.0510982	19.6665	0.0529189	15.635	0.0548321	12.9477	0.0568429	11.0286	0.058957	10.7045	0.0592345	10.7045	0.0591002	10.7045	0.0593688	19.6492	0.0527951			74.7059	0.476938	80.2698	0.185522	78.9319	0.222687	79.5738	0.178785	79.5145	0.153552	86.1089	0.16796	85.023	0.193532	88.5042	0.14763	85.3115	0.263027	83.8272	0.15096	79.5145	0.146552
Sigma Level	2	72.1667	0.132	80.125	0.0477124	39.8141	0.049363	26.3778	0.0510966	19.6601	0.0529177	15.63	0.0548313	12.9435	0.0568427	11.0249	0.0589574	11.0935	0.0587107	11.0935	0.0585787	11.0935	0.0588426	15.6212	0.0547005			73.9855	0.495159	79.6434	0.197875	78.1873	0.235379	78.8634	0.1886	78.7598	0.159814	85.4513	0.176082	84.3863	0.203855	87.8785	0.155076	84.6933	0.274365	83.3014	0.159082	78.7598	0.152814
Absolute Errs	TRUE	79.7065	0.14	80.0962	0.0477018	39.7997	0.0493523	26.3682	0.0510856	19.6529	0.0529066	15.6242	0.05482	12.9387	0.0568312	11.0208	0.0589456	11.5105	0.0581932	11.5105	0.0580635	11.5105	0.0583228	12.9362	0.056703			73.07	0.51274	78.8678	0.208732	77.2652	0.246532	77.9837	0.197225	77.8253	0.165316	84.637	0.183221	83.5979	0.212926	87.1037	0.161619	83.9277	0.284329	82.6503	0.166221	77.8253	0.158316
Symbol Type	1	78.8241	0.158	80.0662	0.047684	39.7846	0.0493337	26.3582	0.0510663	19.6454	0.0528864	15.6182	0.054799	12.9337	0.0568092	11.0165	0.0589227	11.9587	0.0576819	11.9587	0.0575545	11.9587	0.0578093	11.0187	0.0588081			71.9671	0.529529	77.964	0.217795	76.1909	0.255844	76.9588	0.204426	76.7363	0.16991	83.6882	0.18918	82.6792	0.2205	86.201	0.167082	83.0357	0.292647	81.8916	0.17218	76.7363	0.16291
Inverse Plot	TRUE	82.4125	0.122	80.0374	0.0476602	39.7702	0.0493087	26.3486	0.0510401	19.6382	0.0528588	15.6124	0.05477	12.9289	0.0567787	11.0124	0.0588906	12.4417	0.0571768	12.4417	0.0570516	12.4417	0.057302	IsoLine	IsoLine			70.6862	0.545383	76.9568	0.224818	74.9935	0.263059	75.8165	0.210006	75.5228	0.173469	82.6308	0.193798	81.6554	0.226368	85.1949	0.171315	82.0415	0.299093	81.0461	0.176798	75.5228	0.166469
Color Plot	TRUE	79.2922	0.224	80.0121	0.0476325	39.7576	0.0492795	26.3401	0.0510091	19.6319	0.0528261	15.6074	0.0547353	12.9247	0.056742	11.0088	0.0588517	12.9638	0.0566777	12.9638	0.0565547	12.9638	0.0568008					69.2382	0.560168	75.8735	0.229609	73.7059	0.267982	74.5881	0.213813	74.2177	0.175898	81.4936	0.196948	80.5544	0.230372	84.1129	0.174203	80.9724	0.30349	80.1369	0.179948	74.2177	0.168898
3D plot	FALSE	78.7079	0.123	79.9924	0.0476031	39.7478	0.0492482	26.3336	0.0509759	19.627	0.0527908	15.6035	0.0546979	12.9214	0.0567022	11.006	0.0588093	13.5298	0.0561847	13.5298	0.0560638	13.5298	0.0563056					67.6354	0.573757	74.7439	0.232038	72.363	0.270477	73.307	0.215742	72.8566	0.177129	80.3076	0.198545	79.4061	0.232401	82.9845	0.175667	79.8574	0.305719	79.1886	0.181545	72.8566	0.170129
Linear	FALSE	72.1667	0.125	79.98	0.0475744	39.7415	0.0492176	26.3294	0.0509432	19.6239	0.0527559	15.601	0.0546606	12.9194	0.0566624	11.0042	0.0587668	14.1456	0.0556976	14.1456	0.0555788	14.1456	0.0558164					65.8917	0.586034	73.5986	0.232038	71.0016	0.270477	72.0082	0.215742	71.4767	0.177129	79.1053	0.198545	78.242	0.232401	81.8405	0.175667	78.7271	0.305719	78.2272	0.181545	71.4767	0.170129
Data Range	H187:K392	77.8474	0.182	79.9757	0.0475486	39.7394	0.04919	26.328	0.0509136	19.6228	0.0527242	15.6001	0.0546266	12.9187	0.0566259	11.0036	0.0587277	14.8179	0.0552163	14.8179	0.0550996	14.8179	0.055333					64.0218	0.596895	72.469	0.229609	69.6587	0.267982	70.7271	0.213813	70.1157	0.175898	77.9193	0.196948	77.0938	0.230372	80.7122	0.174203	77.6121	0.30349	77.279	0.179948	70.1157	0.168898
Filled Symbols	FALSE	71.6823	0.156	79.98	0.0475279	39.7415	0.0491676	26.3294	0.0508895	19.6239	0.0526982	15.601	0.0545985	12.9194	0.0565957	11.0042	0.0586951	15.555	0.0547407	15.555	0.0546261	15.555	0.0548554					62.0416	0.606246	71.3858	0.224818	68.3711	0.263059	69.4986	0.210006	68.8105	0.173469	76.7822	0.193798	75.9928	0.226368	79.6302	0.171315	76.543	0.299093	76.3697	0.176798	68.8105	0.166469
ConcAge	FALSE	74.1713	0.163	79.9924	0.047514	39.7478	0.0491524	26.3336	0.0508729	19.627	0.0526801	15.6035	0.0545788	12.9214	0.0565741	11.006	0.0586716	16.3668	0.0542709	16.3668	0.0541582	16.3668	0.0543836					59.9682	0.614009	70.3786	0.217795	67.1738	0.255844	68.3564	0.204426	67.597	0.16991	75.7247	0.18918	74.969	0.2205	78.6241	0.167082	75.5488	0.292647	75.5242	0.17218	67.597	0.16291
ConcSwap	FALSE	81.5318	0.21	80.0121	0.047508	39.7576	0.0491455	26.3401	0.0508651	19.6319	0.0526712	15.6074	0.0545688	12.9247	0.056563	11.0088	0.0586592	17.2651	0.0538067	17.2651	0.0536959	17.2651	0.0539174					57.8191	0.620116	69.4748	0.208732	66.0994	0.246532	67.3314	0.197225	66.5081	0.165316	74.7759	0.183221	74.0503	0.212926	77.7213	0.161619	74.6568	0.284329	74.7655	0.166221	66.5081	0.158316
1st Symbol-row	201	84.0997	0.188	80.0374	0.0475103	39.7702	0.0491475	26.3486	0.0508667	19.6382	0.0526724	15.6124	0.0545696	12.9289	0.0565632	11.0124	0.0586589	18.2645	0.0533479	18.2645	0.0532391	18.2645	0.0534568					55.6127	0.624516	68.6991	0.197875	65.1773	0.235379	66.4518	0.1886	65.5735	0.159814	73.9616	0.176082	73.2619	0.203855	76.9465	0.155076	73.8912	0.274365	74.1144	0.159082	65.5735	0.152814
		83.0534	0.098	80.0662	0.0475208	39.7846	0.0491583	26.3582	0.0508777	19.6454	0.0526836	15.6182	0.0545809	12.9337	0.0565748	11.0165	0.0586706	19.3832	0.0528947	19.3832	0.0527878	19.3832	0.0530016					53.3678	0.627171	68.0727	0.185522	64.4327	0.222687	65.7414	0.178785	64.8188	0.153552	73.304	0.16796	72.6252	0.193532	76.3208	0.14763	73.2729	0.263027	73.5886	0.15096	64.8188	0.146552
		84.0997	0.156	80.0962	0.0475387	39.7997	0.0491769	26.3682	0.050897	19.6529	0.0527038	15.6242	0.0546019	12.9387	0.0565967	11.0208	0.0586935	20.6438	0.0524468	20.6438	0.0523418	20.6438	0.0525519					51.1037	0.628058	67.6127	0.17201	63.8858	0.208804	65.2197	0.168049	64.2645	0.146703	72.821	0.159075	72.1576	0.182241	75.8613	0.139485	72.8189	0.250625	73.2024	0.142075	64.2645	0.139703
		93.69	0.162	80.125	0.0475624	39.8141	0.0492018	26.3778	0.0509232	19.6601	0.0527313	15.63	0.0546309	12.9435	0.0566273	11.025	0.0587257	22.0753	0.0520043	22.0753	0.0519011	22.0753	0.0521075					48.8395	0.627171	67.3316	0.157705	63.5516	0.194108	64.9008	0.156684	63.9257	0.139453	72.5259	0.149669	71.8718	0.170288	75.5805	0.130863	72.5414	0.237497	72.9664	0.132669	63.9257	0.132453
		77.9042	0.072	80.1503	0.0475901	39.8267	0.0492311	26.3862	0.0509542	19.6665	0.0527641	15.635	0.0546656	12.9477	0.0566639	11.0286	0.0587645	23.7147	0.051567	23.7147	0.0514656	23.7147	0.0516684					46.5946	0.624516	67.237	0.143	63.4392	0.179	64.7936	0.145	63.8118	0.132	72.4266	0.14	71.7757	0.158	75.486	0.122	72.448	0.224	72.887	0.123	63.8118	0.125
		73.6598	0.246	80.17	0.0476196	39.8365	0.0492623	26.3927	0.0509873	19.6714	0.0527993	15.639	0.0547031	12.951	0.0567038	11.0314	0.0588069	25.611	0.0511349	25.611	0.0510352	25.611	0.0512346					44.3883	0.620116	67.3316	0.128295	63.5516	0.163892	64.9008	0.133316	63.9257	0.124547	72.5259	0.130331	71.8718	0.145712	75.5805	0.113137	72.5414	0.210503	72.9664	0.113331	63.9257	0.117547
		76.2905	0.135	80.1825	0.0476483	39.8428	0.049293	26.3969	0.0510201	19.6745	0.0528342	15.6414	0.0547403	12.9531	0.0567435	11.0331	0.0588494	27.8297	0.0507079	27.8297	0.0506099	27.8297	0.0508058					42.2392	0.614009	67.6127	0.11399	63.8858	0.149196	65.2197	0.121951	64.2645	0.117297	72.821	0.120925	72.1576	0.133759	75.8613	0.104515	72.8189	0.197375	73.2024	0.103925	64.2645	0.110297
		85.4453	0.159	80.1867	0.0476741	39.8449	0.0493206	26.3983	0.0510497	19.6756	0.0528659	15.6423	0.0547743	12.9538	0.05678	11.0338	0.0588885	30.4606	0.0502859	30.4606	0.0501897	30.4606	0.0503822					40.1657	0.606246	68.0727	0.100478	64.4327	0.135313	65.7414	0.111215	64.8188	0.110448	73.304	0.11204	72.6252	0.122468	76.3208	0.09637	73.2729	0.184973	73.5886	0.09504	64.8188	0.103448
		79.116	0.153	ConcTikEll	ConcTikEll	ConcTikEll	ConcTikEll	ConcTikEll	ConcTikEll	ConcTikEll	ConcTikEll	ConcTikEll	ConcTikEll	ConcTikEll	ConcTikEll	ConcTikEll	ConcTikEll	33.6303	0.049869	33.6303	0.0497744	33.6303	0.0499635					38.1856	0.596895	68.6991	0.0881245	65.1773	0.122621	66.4518	0.1014	65.5735	0.104186	73.9616	0.103918	73.2619	0.112145	76.9465	0.0889244	73.8912	0.173635	74.1144	0.0869175	65.5735	0.0971864
		72.1667	0.169															37.5233	0.0494569	37.5233	0.049364	37.5233	0.0495498					36.3156	0.586034	69.4748	0.0772684	66.0994	0.111468	67.3314	0.0927749	66.5081	0.098684	74.7759	0.0967792	74.0503	0.103074	77.7213	0.082381	74.6568	0.163671	74.7655	0.0797792	66.5081	0.091684
		78.5343	0.154															42.419	0.0490497	42.419	0.0489584	42.419	0.049141					34.5719	0.573757	70.3786	0.0682052	67.1738	0.102156	68.3564	0.085574	67.597	0.0940903	75.7247	0.0908199	74.969	0.0955003	78.6241	0.0769182	75.5488	0.155353	75.5242	0.0738199	67.597	0.0870903
		82.2856	0.118															48.7619	0.0486473	48.7619	0.0485575	48.7619	0.048737					32.9692	0.560168	71.3858	0.0611823	68.3711	0.0949407	69.4986	0.0799941	68.8105	0.0905307	76.7822	0.086202	75.9928	0.0896318	79.6302	0.0726852	76.543	0.148907	76.3697	0.069202	68.8105	0.0835307
		76.8393	0.138															57.305	0.0482495	57.305	0.0481614	57.305	0.0483377					31.5212	0.545383	72.469	0.0563911	69.6587	0.0900183	70.7271	0.0761875	70.1157	0.0881023	77.9193	0.0830517	77.0938	0.0856282	80.7122	0.0697974	77.6121	0.14451	77.279	0.0660517	70.1157	0.0811023
		84.166	0.133															69.4333	0.0478565	69.4333	0.0477699	69.4333	0.0479431					30.2402	0.529529	73.5986	0.0539624	71.0016	0.087523	72.0082	0.0742578	71.4767	0.0868713	79.1053	0.0814547	78.242	0.0835987	81.8405	0.0683335	78.7271	0.142281	78.2272	0.0644547	71.4767	0.0798713
		76.7841	0.093															88.0028	0.0474681	88.0028	0.0473829	88.0028	0.0475532					29.1373	0.51274	74.7439	0.0539624	72.363	0.087523	73.307	0.0742578	72.8566	0.0868713	80.3076	0.0814547	79.4061	0.0835987	82.9845	0.0683335	79.8574	0.142281	79.1886	0.0644547	72.8566	0.0798713
		82.4125	0.074															120	0.0470842	120	0.0470005	120	0.0471678					28.2218	0.495159	75.8735	0.0563911	73.7059	0.0900183	74.5881	0.0761875	74.2177	0.0881023	81.4936	0.0830517	80.5544	0.0856282	84.1129	0.0697974	80.9724	0.14451	80.1369	0.0660517	74.2177	0.0811023
		84.7	0.16															120	0.0470842	120	0.0470005	120	0.0471678					27.5015	0.476938	76.9568	0.0611823	74.9935	0.0949407	75.8165	0.0799941	75.5228	0.0905307	82.6308	0.086202	81.6554	0.0896318	85.1949	0.0726852	82.0415	0.148907	81.0461	0.069202	75.5228	0.0835307
		82.9889	0.086															IsoLine	IsoLine	ConcBand	ConcBand	ConcBand	ConcBand					26.9825	0.458231	77.964	0.0682052	76.1909	0.102156	76.9588	0.085574	76.7363	0.0940903	83.6882	0.0908199	82.6792	0.0955003	86.201	0.0769182	83.0357	0.155353	81.8916	0.0738199	76.7363	0.0870903
		75.6421	0.15																									26.6694	0.439197	78.8678	0.0772684	77.2652	0.111468	77.9837	0.0927749	77.8253	0.098684	84.637	0.0967792	83.5979	0.103074	87.1037	0.082381	83.9277	0.163671	82.6503	0.0797792	77.8253	0.091684
		88.4161	0.156																									26.5647	0.42	79.6434	0.0881245	78.1873	0.122621	78.8634	0.1014	78.7598	0.104186	85.4513	0.103918	84.3863	0.112145	87.8785	0.0889244	84.6933	0.173635	83.3014	0.0869175	78.7598	0.0971864
		82.159	0.22																									26.6694	0.400803	80.2698	0.100478	78.9319	0.135313	79.5738	0.111215	79.5145	0.110448	86.1089	0.11204	85.023	0.122468	88.5042	0.09637	85.3115	0.184973	83.8272	0.09504	79.5145	0.103448
		80.9755	0.146																									26.9825	0.381769	80.7299	0.11399	79.4788	0.149196	80.0955	0.121951	80.0688	0.117297	86.5919	0.120925	85.4906	0.133759	88.9637	0.104515	85.7656	0.197375	84.2134	0.103925	80.0688	0.110297
		74.1713	0.091																									27.5015	0.363062	81.011	0.128295	79.813	0.163892	80.4143	0.133316	80.4076	0.124547	86.8871	0.130331	85.7764	0.145712	89.2446	0.113137	86.0431	0.210503	84.4494	0.113331	80.4076	0.117547
		74.1713	0.151																									28.2218	0.344841	81.1056	0.143	79.9254	0.179	80.5216	0.145	80.5215	0.132	86.9864	0.14	85.8725	0.158	89.339	0.122	86.1364	0.224	84.5288	0.123	80.5215	0.125
		71.2044	0.15																									29.1373	0.32726
		84.0713	0.0767																									30.2402	0.310471
		87.6679	0.0687																									31.5212	0.294617
		84.4321	0.0652																									32.9692	0.279832
		84.8692	0.0678																									34.5719	0.266243
		85.0159	0.0579																									36.3156	0.253966
		85.8319	0.0603																									38.1856	0.243105
		84.796	0.0749																									40.1657	0.233754
		84.9425	0.0644																									42.2392	0.225991
		85.6078	0.0636																									44.3883	0.219884
		87.4341	0.0619																									46.5946	0.215484
		85.982	0.0626																									48.8395	0.212829
		87.8245	0.0929																									51.1037	0.211942
		85.8319	0.0643																									53.3678	0.212829
		85.3849	0.0612																									55.6127	0.215484
		85.6824	0.0684																									57.8191	0.219884
		85.5334	0.0622																									59.9682	0.225991
		86.3594	0.0582																									62.0416	0.233754
		84.0713	0.0542																									64.0218	0.243105
		83.7848	0.0669																									65.8917	0.253966
		85.4591	0.0605																									67.6354	0.266243
		83.4295	0.0648																									69.2382	0.279832
		86.7402	0.0617																									70.6862	0.294617
		82.3814	0.0767																									71.9671	0.310471
		80.6919	0.0742																									73.07	0.32726
		85.5334	0.0689																									73.9855	0.344841
		82.7278	0.0674																									74.7059	0.363062
		86.8935	0.0684																									75.2248	0.381769
		88.6157	0.0567																									75.5379	0.400803
		87.2016	0.0616																									75.6426	0.42
		88.4563	0.0536
		89.5841	0.0544
		86.7402	0.0524
		87.9029	0.0574
		83.7135	0.0794
		86.7402	0.072
		87.9029	0.0603
		82.9371	0.0741
		84.4321	0.0737
		82.1063	0.0712
		83.2882	0.0699
		84.723	0.0647
		84.2551	0.0581
		84.6954	0.049
		86.8128	0.0556
		85.8925	0.0527
		88.071	0.0493
		85.7411	0.0575
		83.3165	0.051
		86.5039	0.0565
		88.9573	0.0544
		88.311	0.0566
		89.1204	0.0543
		86.6581	0.0548
		87.2804	0.0532
		87.2804	0.0646
		85.1404	0.0577
		85.8167	0.0591
		87.2804	0.0533
		86.0446	0.0519
		87.6739	0.0493
		86.2736	0.0565
		89.6132	0.0514
		90.1951	0.0586
		83.388	0.0514
		87.2021	0.0473
		87.4374	0.0611
		86.8128	0.0636
		86.5809	0.057
		85.9685	0.0605
		88.5522	0.052
		88.311	0.0857
		89.8617	0.0635
		85.5148	0.0507
		88.5522	0.0543
		86.5039	0.0563
		88.2308	0.0587
		86.8904	0.0603
		86.427	0.0494
		83.7471	0.0581
		86.5039	0.0609
		84.1093	0.0618
		85.3647	0.0532
		88.5522	0.0558
		86.9681	0.0517
		88.633	0.0502
		87.5949	0.0528
		86.5797	0.0667
		87.026	0.0617
		85.3541	0.0585
		86.138	0.0561
		85.9625	0.0615
		85.7007	0.0579
		84.9247	0.059
		83.4142	0.0623
		85.527	0.0611
		84.6692	0.0592
		84.4152	0.054
		85.7007	0.0548
		85.2679	0.0542
		86.4024	0.0543
		84.4997	0.0596
		84.6692	0.0617
		85.3541	0.0577
		83.9117	0.0581
		82.276	0.0949
		83.3319	0.076
		87.1158	0.0594
		85.0103	0.0613
		86.2259	0.0649
		84.1627	0.0941
		87.7497	0.0664
		85.2679	0.0602
		87.296	0.0602
		85.8751	0.0575
		88.4855	0.0662
		86.0502	0.0592
		85.7007	0.0858
		86.0502	0.0609
		87.1158	0.0618
		82.322	0.106
		82.9389	0.086
		84.3434	0.07
		83.008	0.0611
		86.2421	0.064
		85.4284	0.074
		87.6845	0.09
		81.9158	0.081
		79.8154	0.077
		78.5564	0.082
		85.7225	0.084
		85.1364	0.0638
		85.7964	0.094
		86.1674	0.078
		80.9176	0.083
		84.8463	0.0703
		83.0772	0.074
		85.1364	0.0664
		84.5582	0.0664
		85.5752	0.0587
		86.1674	0.0675
		89.6576	0.07
		86.617	0.063
		83.3553	0.063
		84.4865	0.069
		86.6924	0.067
		84.8463	0.079
		82.9389	0.079
		80.1364	0.078
		79.9435	0.072
		82.4583	0.08
		83.8464	0.0646
		83.2856	0.079
		80.3303	0.0748
		85.9444	0.064
		85.2822	0.0642
		85.1364	0.074
		83.8464	0.079
		83.008	0.088
		84.4865	0.0668
		84.5582	0.0688
		84.8463	0.0721	90.0831	0.0563	92.0524	0.0587	90.5967	0.0603	90.1879	0.0494	87.5432	0.0581	90.4599	0.0609	87.7603	0.0618	88.8502	0.0532	91.9082	0.0558	90.3955	0.0517	92.1928	0.0502	91.0718	0.0528	89.6227	0.0667	90.2103	0.0617	88.1003	0.0585	88.9349	0.0561	88.9623	0.0615	88.5758	0.0579	87.6434	0.059	86.0371	0.0623	88.1784	0.0611	87.4755	0.0592	87.308	0.054
		86.0186	0.0699	89.9381	0.0579895	91.8976	0.0606999	90.4466	0.0625412	90.0356	0.0512275	87.3895	0.0601343	90.2996	0.0631068	87.6124	0.0641102	88.7091	0.0545447	91.7722	0.0571792	90.2566	0.0532861	92.0486	0.0517861	90.931	0.0544895	89.4995	0.0686309	90.0813	0.063424	87.9891	0.0601206	88.8216	0.0576861	88.8408	0.0629482	88.4593	0.0593482	87.5333	0.0604482	85.9308	0.0638171	88.071	0.0625137	87.3618	0.0606827	87.1908	0.0555861
		IsoLine	IsoLine	89.5149	0.0595422	91.4457	0.0625377	90.0084	0.0646009	89.5909	0.0529069	86.9406	0.0620039	89.8319	0.0651347	87.1807	0.0662332	88.2969	0.0557805	91.3754	0.0584467	89.8514	0.0547437	91.6277	0.0532437	90.5199	0.0560422	89.1397	0.0704054	89.7048	0.0650084	87.6644	0.0616099	88.4909	0.0591437	88.4861	0.064279	88.1194	0.060679	87.2118	0.061779	85.6207	0.0652114	87.7575	0.0638129	87.03	0.0620452	86.8488	0.0570437
				88.8478	0.0608322	90.7334	0.0640647	89.3175	0.0663121	88.8899	0.0543022	86.233	0.0635572	89.0945	0.0668196	86.5002	0.0679971	87.6472	0.0568073	90.7499	0.0594998	89.2126	0.0559547	90.9641	0.0544547	89.8718	0.0573322	88.5725	0.0718797	89.1113	0.0663247	87.1525	0.0628472	87.9695	0.0603547	87.927	0.0653848	87.5835	0.0617848	86.7051	0.0628848	85.1318	0.0663697	87.2633	0.0648923	86.5069	0.0631772	86.3096	0.0582547
				87.9907	0.061755	89.8183	0.065157	88.4301	0.0675363	87.9893	0.0553004	85.3241	0.0646683	88.1473	0.068025	85.626	0.0692589	86.8126	0.0575418	89.9463	0.0602531	88.3919	0.0568211	90.1118	0.0553211	89.0393	0.058255	87.8438	0.0729343	88.3488	0.0672664	86.4949	0.0637324	87.2998	0.0612211	87.2087	0.0661758	86.895	0.0625758	86.0541	0.0636758	84.5038	0.0671984	86.6284	0.0656644	85.835	0.0639871	85.6169	0.0591211
				87.0133	0.0622359	88.7747	0.0657262	87.4179	0.0681742	86.9622	0.0558205	84.2873	0.0652474	87.0669	0.0686531	84.6289	0.0699165	85.8607	0.0579245	89.0298	0.0606457	87.4559	0.0572725	89.1396	0.0557725	88.0897	0.0587359	87.0128	0.0734839	87.4792	0.0677571	85.7449	0.0641937	86.536	0.0616725	86.3895	0.0665879	86.1099	0.0629879	85.3117	0.0640879	83.7875	0.0676302	85.9044	0.0660668	85.0686	0.0644091	84.8269	0.0595725
				85.9945	0.0622359	87.687	0.0657262	86.3629	0.0681742	85.8918	0.0558205	83.2068	0.0652474	85.9409	0.0686531	83.5897	0.0699165	84.8686	0.0579245	88.0746	0.0606457	86.4804	0.0572725	88.1263	0.0557725	87.1001	0.0587359	86.1466	0.0734839	86.5728	0.0677571	84.9632	0.0641937	85.7399	0.0616725	85.5356	0.0665879	85.2915	0.0629879	84.5378	0.0640879	83.041	0.0676302	85.1497	0.0660668	84.2698	0.0644091	84.0035	0.0595725
				85.017	0.061755	86.6433	0.065157	85.3507	0.0675363	84.8647	0.0553004	82.1701	0.0646683	84.8605	0.068025	82.5926	0.0692589	83.9167	0.0575418	87.1581	0.0602531	85.5444	0.0568211	87.1542	0.0553211	86.1506	0.058255	85.3156	0.0729343	85.7032	0.0672664	84.2133	0.0637324	84.9761	0.0612211	84.7164	0.0661758	84.5063	0.0625758	83.7954	0.0636758	82.3247	0.0671984	84.4256	0.0656644	83.5034	0.0639871	83.2135	0.0591211
				84.16	0.0608322	85.7282	0.0640647	84.4633	0.0663121	83.9641	0.0543022	81.2611	0.0635572	83.9133	0.0668196	81.7184	0.0679971	83.0821	0.0568073	86.3546	0.0594998	84.7237	0.0559547	86.3018	0.0544547	85.318	0.0573322	84.5869	0.0718797	84.9407	0.0663247	83.5557	0.0628472	84.3064	0.0603547	83.9981	0.0653848	83.8179	0.0617848	83.1444	0.0628848	81.6967	0.0663697	83.7908	0.0648923	82.8315	0.0631772	82.5208	0.0582547
				83.4928	0.0595422	85.0159	0.0625377	83.7724	0.0646009	83.2631	0.0529069	80.5536	0.0620039	83.1759	0.0651347	81.0379	0.0662332	82.4324	0.0557805	85.7291	0.0584467	84.0849	0.0547437	85.6383	0.0532437	84.6699	0.0560422	84.0197	0.0704054	84.3472	0.0650084	83.0438	0.0616099	83.785	0.0591437	83.439	0.064279	83.282	0.060679	82.6376	0.061779	81.2078	0.0652114	83.2966	0.0638129	82.3084	0.0620452	81.9817	0.0570437
				83.0696	0.0579895	84.5641	0.0606999	83.3342	0.0625412	82.8184	0.0512275	80.1047	0.0601343	82.7081	0.0631068	80.6062	0.0641102	82.0203	0.0545447	85.3323	0.0571792	83.6796	0.0532861	85.2173	0.0517861	84.2588	0.0544895	83.6599	0.0686309	83.9707	0.063424	82.7191	0.0601206	83.4543	0.0576861	83.0843	0.0629482	82.9421	0.0593482	82.3162	0.0604482	80.8977	0.0638171	82.9831	0.0625137	81.9766	0.0606827	81.6396	0.0555861
				82.9247	0.0563	84.4093	0.0587	83.1841	0.0603	82.6661	0.0494	79.9509	0.0581	82.5479	0.0609	80.4584	0.0618	81.8791	0.0532	85.1963	0.0558	83.5408	0.0517	85.0731	0.0502	84.118	0.0528	83.5367	0.0667	83.8417	0.0617	82.6078	0.0585	83.341	0.0561	82.9627	0.0615	82.8256	0.0579	82.2061	0.059	80.7914	0.0623	82.8757	0.0611	81.8629	0.0592	81.5224	0.054
				83.0696	0.0546105	84.5641	0.0567001	83.3342	0.0580588	82.8184	0.0475725	80.1047	0.0560657	82.7081	0.0586932	80.6062	0.0594898	82.0203	0.0518553	85.3323	0.0544208	83.6796	0.0501139	85.2173	0.0486139	84.2588	0.0511105	83.6599	0.0647691	83.9707	0.059976	82.7191	0.0568794	83.4543	0.0545139	83.0843	0.0600518	82.9421	0.0564518	82.3162	0.0575518	80.8977	0.0607829	82.9831	0.0596863	81.9766	0.0577173	81.6396	0.0524139
				83.4928	0.0530578	85.0159	0.0548623	83.7724	0.0559991	83.2631	0.0458931	80.5536	0.0541961	83.1759	0.0566653	81.0379	0.0573668	82.4324	0.0506195	85.7291	0.0531533	84.0849	0.0486563	85.6383	0.0471563	84.6699	0.0495578	84.0197	0.0629946	84.3472	0.0583916	83.0438	0.0553901	83.785	0.0530563	83.439	0.058721	83.282	0.055121	82.6376	0.056221	81.2078	0.0593886	83.2966	0.0583871	82.3084	0.0563548	81.9817	0.0509563
				84.16	0.0517678	85.7282	0.0533353	84.4633	0.0542879	83.9641	0.0444978	81.2611	0.0526428	83.9133	0.0549804	81.7184	0.0556029	83.0821	0.0495927	86.3546	0.0521002	84.7237	0.0474453	86.3018	0.0459453	85.318	0.0482678	84.5869	0.0615203	84.9407	0.0570753	83.5557	0.0541528	84.3064	0.0518453	83.9981	0.0576152	83.8179	0.0540152	83.1444	0.0551152	81.6967	0.0582303	83.7908	0.0573077	82.8315	0.0552228	82.5208	0.0497453
				85.017	0.050845	86.6433	0.052243	85.3507	0.0530637	84.8647	0.0434996	82.1701	0.0515317	84.8605	0.053775	82.5926	0.0543411	83.9167	0.0488582	87.1581	0.0513469	85.5444	0.0465789	87.1542	0.0450789	86.1506	0.047345	85.3156	0.0604657	85.7032	0.0561336	84.2133	0.0532676	84.9761	0.0509789	84.7164	0.0568242	84.5063	0.0532242	83.7954	0.0543242	82.3247	0.0574016	84.4256	0.0565356	83.5034	0.0544129	83.2135	0.0488789
				85.9945	0.0503641	87.687	0.0516738	86.3629	0.0524258	85.8918	0.0429795	83.2068	0.0509526	85.9409	0.0531469	83.5897	0.0536835	84.8686	0.0484755	88.0746	0.0509543	86.4804	0.0461275	88.1263	0.0446275	87.1001	0.0468641	86.1466	0.0599161	86.5728	0.0556429	84.9632	0.0528063	85.7399	0.0505275	85.5356	0.0564121	85.2915	0.0528121	84.5378	0.0539121	83.041	0.0569698	85.1497	0.0561332	84.2698	0.0539909	84.0035	0.0484275
				87.0133	0.0503641	88.7747	0.0516738	87.4179	0.0524258	86.9622	0.0429795	84.2873	0.0509526	87.0669	0.0531469	84.6289	0.0536835	85.8607	0.0484755	89.0298	0.0509543	87.4559	0.0461275	89.1396	0.0446275	88.0897	0.0468641	87.0128	0.0599161	87.4792	0.0556429	85.7449	0.0528063	86.536	0.0505275	86.3895	0.0564121	86.1099	0.0528121	85.3117	0.0539121	83.7875	0.0569698	85.9044	0.0561332	85.0686	0.0539909	84.8269	0.0484275
				87.9907	0.050845	89.8183	0.052243	88.4301	0.0530637	87.9893	0.0434996	85.3241	0.0515317	88.1473	0.053775	85.626	0.0543411	86.8126	0.0488582	89.9463	0.0513469	88.3919	0.0465789	90.1118	0.0450789	89.0393	0.047345	87.8438	0.0604657	88.3488	0.0561336	86.4949	0.0532676	87.2998	0.0509789	87.2087	0.0568242	86.895	0.0532242	86.0541	0.0543242	84.5038	0.0574016	86.6284	0.0565356	85.835	0.0544129	85.6169	0.0488789
				88.8478	0.0517678	90.7334	0.0533353	89.3175	0.0542879	88.8899	0.0444978	86.233	0.0526428	89.0945	0.0549804	86.5002	0.0556029	87.6472	0.0495927	90.7499	0.0521002	89.2126	0.0474453	90.9641	0.0459453	89.8718	0.0482678	88.5725	0.0615203	89.1113	0.0570753	87.1525	0.0541528	87.9695	0.0518453	87.927	0.0576152	87.5835	0.0540152	86.7051	0.0551152	85.1318	0.0582303	87.2633	0.0573077	86.5069	0.0552228	86.3096	0.0497453
				89.5149	0.0530578	91.4457	0.0548623	90.0084	0.0559991	89.5909	0.0458931	86.9406	0.0541961	89.8319	0.0566653	87.1807	0.0573668	88.2969	0.0506195	91.3754	0.0531533	89.8514	0.0486563	91.6277	0.0471563	90.5199	0.0495578	89.1397	0.0629946	89.7048	0.0583916	87.6644	0.0553901	88.4909	0.0530563	88.4861	0.058721	88.1194	0.055121	87.2118	0.056221	85.6207	0.0593886	87.7575	0.0583871	87.03	0.0563548	86.8488	0.0509563
				89.9381	0.0546105	91.8976	0.0567001	90.4466	0.0580588	90.0356	0.0475725	87.3895	0.0560657	90.2996	0.0586932	87.6124	0.0594898	88.7091	0.0518553	91.7722	0.0544208	90.2566	0.0501139	92.0486	0.0486139	90.931	0.0511105	89.4995	0.0647691	90.0813	0.059976	87.9891	0.0568794	88.8216	0.0545139	88.8408	0.0600518	88.4593	0.0564518	87.5333	0.0575518	85.9308	0.0607829	88.071	0.0596863	87.3618	0.0577173	87.1908	0.0524139
				90.0831	0.0563	92.0524	0.0587	90.5967	0.0603	90.1879	0.0494	87.5432	0.0581	90.4599	0.0609	87.7603	0.0618	88.8502	0.0532	91.9082	0.0558	90.3955	0.0517	92.1928	0.0502	91.0718	0.0528	89.6227	0.0667	90.2103	0.0617	88.1003	0.0585	88.9349	0.0561	88.9623	0.0615	88.5758	0.0579	87.6434	0.059	86.0371	0.0623	88.1784	0.0611	87.4755	0.0592	87.308	0.054
[truncated: 206 more columns]

## Sheet: Table S5
Table S5 Signal intensities, element compositions and isotope ratios of the TARIM and QC standard LD-5 with LA-Q-ICPMS under different laser parameters and different grains
Sample	Intensity (CPS)			Concentration (μg·g-1)			Isotope ratios				f206
	238U	207Pb	206Pb	U	Th	Pb	238U/206Pb	2σ	207Pb/206Pb	2σ
Session 1 2022-10-16 TARIM-H 67 μm 10 Hz 3 J·cm-2
TARIM-H 01	49140	84.6	1465	0.973	0.00703	0.0527	29.1026	0.951585	0.0578	0.0054	0.00928594
TARIM-H 02	49770	80.5	1435	0.991	0.008	0.0506	29.9178	0.921838	0.0572	0.0055	0.00854494
TARIM-H 03	47430	70.3	1378	0.949	0.0077	0.0477	29.7512	0.911595	0.0518	0.0052	0.00187596
TARIM-H 04	47720	71.1	1377	0.96	0.0082	0.0485	30.0864	0.932254	0.0528	0.007	0.00311096
TARIM-H 05	40710	72.9	1193	0.823	0.00692	0.0446	29.7512	1.07734	0.0612	0.0076	0.0134849
TARIM-H 06	33880	43	993	0.688	0.00505	0.0353	29.6685	1.07136	0.0443	0.0077	-0.00738651
TARIM-H 07	35830	68.3	1045	0.732	0.00552	0.0392	29.5863	1.06544	0.0667	0.0087	0.0202774
TARIM-H 08	31050	54.7	905	0.637	0.00493	0.0336	29.5046	1.14106	0.065	0.01	0.0181779
TARIM-H 09	30940	60	894	0.638	0.00404	0.0336	29.9178	1.17325	0.069	0.019	0.0231179
TARIM-H 10	22750	32.7	652	0.4708	0.00273	0.0243	29.9178	1.25705	0.0503	0.0096	2.34649e-05
TARIM-H 11	15860	34.5	466	0.3295	0.00248	0.0182	29.1026	1.74457	0.079	0.02	0.0354679
TARIM-H 12	19030	33.9	525	0.3969	0.00272	0.0205	31.0484	1.71489	0.072	0.013	0.0268229
TARIM-H 13	17330	28.4	485	0.3627	0.00217	0.0194	30.3428	1.63782	0.084	0.027	0.0416428
TARIM-H 14	22410	40.7	647	0.4704	0.00319	0.0257	29.5046	1.63009	0.0664	0.0098	0.0199069
TARIM-H 15	17860	34.4	508	0.3761	0.0029	0.0195	30.0019	1.43267	0.069	0.018	0.0231179
TARIM-H 16	26670	62	716	0.563	0.00372	0.0284	32.0741	1.34846	0.09	0.037	0.0490528
TARIM-H 17	22410	44.3	654	0.4742	0.00315	0.0255	29.4233	1.21584	0.072	0.013	0.0268229
TARIM-H 18	23440	61	687	0.4972	0.00293	0.0281	29.1026	1.34808	0.09	0.019	0.0490528
TARIM-H 19	23410	43.3	696	0.4976	0.00373	0.0272	28.3307	1.12721	0.064	0.013	0.0169429
TARIM-H 20	18270	37	537	0.3889	0.00243	0.0215	28.9449	1.49039	0.081	0.026	0.0379379
TARIM-H 21	11630	21.8	351	0.248	0.00187	0.01434	27.742	1.5132	0.066	0.015	0.0194129
TARIM-H 22	8630	17.6	241	0.1843	0.0011	0.00998	29.9178	2.01128	0.081	0.03	0.0379379
TARIM-H 23	6650	24	214	0.1421	0.00169	0.0098	25.6747	2.16013	0.126	0.053	0.0935127
TARIM-H 24	12380	26.2	357	0.2646	0.00201	0.0166	29.1026	1.66527	0.076	0.02	0.0317629
TARIM-H 25	12230	23.1	352	0.2615	0.00182	0.01428	28.7889	1.62956	0.07	0.018	0.0243529
TARIM-H 26	9640	35.8	296	0.2061	0.00159	0.0135	27.1083	2.82091	0.122	0.027	0.0885727
TARIM-H 27	6560	19	196	0.1403	0.00159	0.00877	28.0332	2.28092	0.151	0.049	0.124388
TARIM-H 28	9070	38	261	0.1938	0.00175	0.0121	28.9449	2.19636	0.139	0.033	0.109568
TARIM-H 29	6180	21.9	194	0.132	0.00142	0.00854	25.987	2.27624	0.127	0.035	0.0947477
TARIM-H 30	8450	14.5	224	0.1804	0.00126	0.0096	30.5162	2.96443	0.088	0.028	0.0465828
TARIM-H 31	6400	9	180	0.1366	0.00083	0.00764	29.4233	2.26957	0.072	0.027	0.0268229
TARIM-H 32	5560	11.5	166	0.1187	0.00114	0.00692	28.107	2.73674	0.095	0.037	0.0552278
TARIM-H 33	6700	16.4	199	0.143	0.00185	0.00808	27.742	2.37788	0.094	0.033	0.0539928
TARIM-H 34	5850	13.7	169	0.125	0.00109	0.00724	28.1812	2.7512	0.12	0.048	0.0861027
TARIM-H 35	7810	14.9	223	0.1669	0.00171	0.0111	28.8667	1.95045	0.051	0.023	0.000887962
TARIM-H 36	9770	19.5	268	0.209	0.00193	0.01112	30.3428	1.98263	0.08	0.02	0.0367029
TARIM-H 37	10200	37	297	0.2181	0.00256	0.0133	28.6345	1.99597	0.141	0.043	0.112038
TARIM-H 38	11920	42	329	0.2551	0.00246	0.0156	29.2621	2.24476	0.113	0.034	0.0774577
TARIM-H 39	11580	25.7	340	0.248	0.0022	0.0146	27.9599	2.04941	0.081	0.022	0.0379379
TARIM-H 40	12810	23.9	361	0.2746	0.00289	0.0147	29.5046	1.8746	0.076	0.022	0.0317629
Session 2 2022-10-28 TARIM-H 100 μm 15 Hz 3 J·cm-2
TARIM-H 01	65800	81.3	1620	0.3838	0.0478	0.01769	30.3778	0.938166	0.0504	0.004	0.000146965
TARIM-H 02	105600	131.5	2582	0.6178	0.045	0.02793	31.306	0.856879	0.0511	0.0038	0.00101146
TARIM-H 03	142700	173.8	3468	0.839	0.0357	0.03717	31.5976	0.791717	0.0508	0.0031	0.000640963
TARIM-H 04	162500	187	3910	0.958	0.0385	0.04194	31.8225	0.803027	0.0481	0.0029	-0.00269353
TARIM-H 05	106200	124.2	2564	0.6281	0.0481	0.02799	31.7199	0.900145	0.049	0.0034	-0.00158203
TARIM-H 06	95200	111.8	2336	0.5647	0.066	0.02584	30.9124	0.864616	0.0482	0.0035	-0.00257003
TARIM-H 07	129300	151.9	3176	0.77	0.0443	0.03526	30.729	0.787184	0.0484	0.0032	-0.00232303
TARIM-H 08	177100	195.4	4272	1.056	0.0289	0.04675	31.4662	0.77508	0.0454	0.0023	-0.00602802
TARIM-H 09	146700	163.2	3580	0.877	0.0288	0.03888	31.416	0.752538	0.0457	0.0028	-0.00565752
TARIM-H 10	106300	120.5	2622	0.6365	0.0255	0.02853	30.9124	0.874331	0.0461	0.003	-0.00516352
TARIM-H 11	143400	158.5	3444	0.8596	0.0332	0.03749	31.8534	0.783957	0.0461	0.0028	-0.00516352
TARIM-H 12	182000	203.7	4241	1.093	0.0358	0.04634	32.6139	0.789394	0.048	0.0023	-0.00281703
TARIM-H 13	66590	79.5	1688	0.4001	0.0511	0.01865	29.9432	1.00266	0.048	0.0037	-0.00281703
TARIM-H 14	174700	211	4258	1.05	0.0386	0.04675	31.3159	0.757724	0.0494	0.0025	-0.00108803
TARIM-H 15	232400	272	5515	1.399	0.0289	0.06053	32.2186	0.717611	0.049	0.0023	-0.00158203
TARIM-H 16	182200	219	4364	1.097	0.0341	0.04815	31.7506	0.768656	0.0498	0.0026	-0.000594033
TARIM-H 17	178700	203	4390	1.076	0.0395	0.04842	30.8639	0.697271	0.0462	0.0027	-0.00504002
TARIM-H 18	170500	214	4103	1.027	0.0321	0.04546	31.4964	0.746313	0.0524	0.0029	0.00261696
TARIM-H 19	164600	199.7	3973	0.992	0.0199	0.04374	31.7711	0.738863	0.0502	0.0024	-0.000100035
TARIM-H 20	149300	183	3718	0.8997	0.01961	0.04079	30.5476	0.796895	0.0496	0.0029	-0.000841033
TARIM-H 21	226400	282	5504	1.364	0.0322	0.0611	31.0687	0.716365	0.0515	0.0025	0.00150546
TARIM-H 22	187500	245	4585	1.131	0.0297	0.05165	30.8446	0.75443	0.0535	0.0029	0.00397545
TARIM-H 23	168000	225	4150	1.013	0.0307	0.047	30.6428	0.744591	0.0538	0.003	0.00434595
TARIM-H 24	159300	267	3980	0.961	0.04	0.046	30.3591	0.721496	0.0662	0.004	0.0196599
TARIM-H 25	160400	224	4012	0.968	0.0848	0.0456	30.099	0.736817	0.0552	0.0034	0.00607495
TARIM-H 26	201800	232	4953	1.218	0.0618	0.0554	30.5287	0.71063	0.0468	0.0025	-0.00429902
TARIM-H 27	223800	267	5440	1.352	0.0502	0.06115	30.729	0.700785	0.0488	0.0023	-0.00182903
TARIM-H 28	122000	147.6	2988	0.7379	0.0567	0.03386	30.4814	0.821779	0.0498	0.003	-0.000594033
TARIM-H 29	71110	84.8	1771	0.4303	0.0457	0.02033	29.8795	0.90764	0.0486	0.0041	-0.00207603
TARIM-H 30	99020	119.3	2479	0.5998	0.0662	0.02839	29.726	0.844438	0.0488	0.0034	-0.00182903
TARIM-H 31	146300	168.6	3638	0.887	0.0617	0.04117	29.8886	0.717472	0.0464	0.0026	-0.00479302
TARIM-H 32	115800	142.8	2920	0.7032	0.0589	0.03303	29.8161	0.822451	0.0493	0.0033	-0.00121153
TARIM-H 33	144600	178	3683	0.879	0.0593	0.04138	29.789	0.721721	0.0485	0.0028	-0.00219953
TARIM-H 34	194700	243	5003	1.185	0.0374	0.05594	29.4149	0.66852	0.0487	0.0023	-0.00195253
TARIM-H 35	131600	163	3347	0.802	0.01079	0.03717	29.9159	0.773373	0.0485	0.0028	-0.00219953
TARIM-H 36	186300	233	4596	1.138	0.01131	0.05126	30.8253	0.734165	0.0508	0.0022	0.000640963
TARIM-H 37	133800	172	3396	0.8186	0.00928	0.03829	29.8614	0.734296	0.0503	0.0032	2.34649e-05
TARIM-H 38	110800	136.3	2764	0.6793	0.00846	0.03129	30.2936	0.811686	0.0495	0.0036	-0.000964532
TARIM-H 39	81380	104.7	2004	0.4995	0.00536	0.02274	30.7098	0.958781	0.053	0.0041	0.00335796
TARIM-H 40	76280	95.2	1901	0.469	0.00493	0.02156	30.4248	0.884606	0.0506	0.0037	0.000393964
TARIM-H 41	87490	106.1	2257	0.5388	0.00525	0.02564	29.2226	0.833444	0.047	0.0036	-0.00405202
Session 3 2022-11-03 TARIM-H 100 μm 15 Hz 3 J·cm-2
TARIM-H -01	72820	110	1826	0.4137	0.0398	0.01912	30.8668	1.17588	0.061	0.006	0.0132379
TARIM-H -02	85100	169	2116	0.483	0.0518	0.02262	30.7011	1.16329	0.0788	0.0084	0.0352209
TARIM-H -03	140900	326	3633	0.802	0.0289	0.0404	29.9078	0.800363	0.088	0.014	0.0465828
TARIM-H -04	98400	195	2527	0.5614	0.0643	0.0279	30.2051	0.938339	0.074	0.01	0.0292929
TARIM-H -05	87200	171	2222	0.4988	0.0678	0.02422	30.2993	0.944197	0.0763	0.0075	0.0321334
TARIM-H -06	148200	197	3658	0.8504	0.0605	0.03839	31.1336	0.837408	0.0535	0.0036	0.00397545
TARIM-H -07	244200	315	5981	1.405	0.0302	0.06253	31.1836	0.79009	0.0524	0.0022	0.00261696
TARIM-H -08	207200	293	5159	1.193	0.0307	0.0544	30.8668	0.774119	0.0565	0.0035	0.00768044
TARIM-H -09	191700	278	4720	1.104	0.039	0.0496	31.0442	0.842514	0.0588	0.0033	0.0105209
TARIM-H -10	195800	363	4880	1.13	0.0396	0.0533	30.8668	0.793717	0.0735	0.0049	0.0286754
TARIM-H -11	144700	255	3692	0.8362	0.02041	0.04018	30.0743	0.837207	0.0699	0.0059	0.0242294
TARIM-H -12	158900	294	3996	0.919	0.0229	0.0434	30.7594	0.836857	0.073	0.0058	0.0280579
TARIM-H -13	174400	247	4389	1.0112	0.0329	0.04623	30.5276	0.853047	0.0566	0.0038	0.00780394
TARIM-H -14	154900	209	3892	0.9008	0.0743	0.04105	30.9651	0.798781	0.054	0.0032	0.00459295
TARIM-H -15	160000	236	3996	0.9319	0.0669	0.0427	30.906	0.835033	0.0587	0.005	0.0103974
TARIM-H -16	190100	280	4724	1.1074	0.0449	0.0499	30.9159	0.835564	0.0613	0.0064	0.0136084
TARIM-H -17	194700	260	4845	1.136	0.069	0.05128	30.9257	0.79675	0.0535	0.0026	0.00397545
TARIM-H -18	130700	179	3363	0.764	0.0908	0.03612	29.8803	0.835619	0.0539	0.0039	0.00446945
TARIM-H -19	151100	265	3893	0.884	0.0869	0.0426	29.8619	0.81625	0.0671	0.0056	0.0207714
TARIM-H -20	149600	233	3941	0.8744	0.0765	0.04245	29.1633	0.874723	0.0593	0.0044	0.0111384
TARIM-H -21	125200	231	3182	0.733	0.0515	0.03483	30.3655	0.872463	0.067	0.01	0.0206479
TARIM-H -22	131500	237	3382	0.7716	0.0598	0.03747	29.7887	0.830506	0.0682	0.0061	0.0221299
TARIM-H -23	199500	270	5131	1.173	0.0473	0.05553	29.4906	0.733462	0.0524	0.0034	0.00261696
TARIM-H -24	147500	233	3741	0.8654	0.01513	0.04054	30.1958	0.797093	0.0618	0.005	0.0142259
TARIM-H -25	172800	245	4325	1.011	0.01123	0.0461	30.4225	0.790072	0.0561	0.0039	0.00718644
TARIM-H -26	143300	264	3739	0.8391	0.00923	0.0418	29.0674	0.782082	0.07	0.0055	0.0243529
TARIM-H -27	124000	207	3137	0.7274	0.00944	0.03444	30.0186	0.834108	0.0654	0.0044	0.0186719
TARIM-H -28	85880	193	2187	0.5057	0.00577	0.02556	29.6434	0.903762	0.092	0.014	0.0515228
TARIM-H -29	76600	156	2076	0.4532	0.00473	0.02385	27.9317	0.882646	0.0749	0.0082	0.0304044
TARIM-H -30	89520	231	2413	0.531	0.00517	0.02918	28.0607	0.890816	0.096	0.01	0.0564628
TARIM-H -31	94500	170	2409	0.5596	0.00503	0.02721	29.5443	0.83489	0.0712	0.0077	0.0258349
TARIM-H -32	86340	240	2244	0.5097	0.00478	0.02651	29.3659	0.886918	0.103	0.016	0.0651078
Session 4 2022-11-09 TARIM-H 120 μm 15 Hz 3 J·cm-2
TARIM-H 01	144800	181	3306	0.3842	0.00318	0.01595	29.0386	0.589363	0.055	0.0031	0.00582795
TARIM-H 02	177200	208	4067	0.4757	0.00351	0.01977	28.9589	0.596067	0.052	0.0028	0.00212296
TARIM-H 03	220500	240	4893	0.5971	0.00428	0.02372	29.9451	0.552375	0.0493	0.0027	-0.00121153
TARIM-H 04	298600	330	6690	0.823	0.00752	0.03321	29.5261	0.526699	0.05	0.002	-0.000347034
TARIM-H 05	246900	291	5506	0.6893	0.00639	0.02787	29.5055	0.556902	0.0519	0.0023	0.00199946
TARIM-H 06	447200	479	9990	1.264	0.01326	0.0508	29.5468	0.475727	0.0474	0.0016	-0.00355802
TARIM-H 07	469200	521	10400	1.335	0.02215	0.05349	29.8604	0.443627	0.0501	0.0018	-0.000223534
TARIM-H 08	239900	317	5416	0.6743	0.04597	0.02811	29.3007	0.579708	0.0586	0.0026	0.0102739
TARIM-H 09	260200	516	6090	0.7233	0.0749	0.0335	28.0449	0.549718	0.0846	0.0039	0.0423838
TARIM-H 10	388400	403	8498	1.0899	0.0514	0.04335	29.9557	0.467726	0.0475	0.0017	-0.00343452
TARIM-H 11	268600	288	5744	0.764	0.0497	0.02959	31.1151	0.527569	0.05	0.0022	-0.000347034
TARIM-H 12	306000	332	6560	0.8754	0.02648	0.03397	30.8987	0.588116	0.0506	0.002	0.000393964
TARIM-H 13	356500	420	7650	1.015	0.0247	0.04003	30.5299	0.529995	0.0549	0.0033	0.00570445
TARIM-H 14	359000	395	7550	1.016	0.02419	0.03914	31.1266	0.539435	0.0523	0.0022	0.00249346
TARIM-H 15	302200	329	6470	0.8583	0.03148	0.03329	30.9327	0.54407	0.0513	0.0022	0.00125846
TARIM-H 16	320400	334	6862	0.9155	0.0415	0.03551	30.9553	0.510814	0.0486	0.0019	-0.00207603
TARIM-H 17	167100	178.7	3697	0.4782	0.0555	0.01927	29.7237	0.607033	0.048	0.0023	-0.00281703
TARIM-H 18	288800	667	6640	0.829	0.0397	0.03851	28.8107	0.511315	0.0989	0.0066	0.0600443
Session 5 2022-11-14 TARIM-I 67 μm 15 Hz 3 J·cm-2
TARIM-I 01	69400	163	1947	1.012	0.0308	0.053	29.4007	0.841756	0.0823	0.0098	0.0395433
TARIM-I 02	64700	108	1740	0.942	0.0308	0.0444	30.5364	0.83315	0.062	0.0069	0.0144729
TARIM-I 03	62890	94.7	1669	0.915	0.0506	0.0422	30.7722	0.855575	0.0559	0.0043	0.00693944
TARIM-I 04	60050	84.9	1621	0.874	0.0432	0.041	30.5083	0.934404	0.0536	0.0053	0.00409895
TARIM-I 05	44560	67.7	1193	0.6502	0.0713	0.03067	30.9828	0.963694	0.0569	0.0062	0.00817444
TARIM-I 06	41360	64	1093	0.6056	0.0749	0.02867	30.8389	0.935669	0.0591	0.0091	0.0108914
TARIM-I 07	32030	60.1	897	0.4709	0.0525	0.02395	29.1256	1.10711	0.069	0.0083	0.0231179
TARIM-I 08	67900	101.1	1806	1.002	0.0594	0.0466	31.0697	0.852819	0.0566	0.0046	0.00780394
TARIM-I 09	97400	159	2553	1.443	0.0357	0.0663	31.4523	0.744846	0.0613	0.0044	0.0136084
TARIM-I 10	112900	196	3002	1.677	0.0296	0.0794	31.1183	0.670778	0.0652	0.0039	0.0184249
TARIM-I 11	76200	133.5	2035	1.135	0.0306	0.0539	30.925	0.787288	0.0661	0.0044	0.0195364
TARIM-I 12	72600	150	1982	1.083	0.0352	0.0532	30.1117	0.901167	0.0751	0.0069	0.0306514
TARIM-I 13	80300	149	2158	1.199	0.0406	0.0577	30.4616	0.754554	0.0683	0.0063	0.0222534
TARIM-I 14	73400	163	2001	1.097	0.0347	0.0554	30.1939	0.787109	0.0793	0.0059	0.0358384
TARIM-I 15	76700	113.2	2063	1.147	0.0236	0.0535	30.8198	0.762866	0.0561	0.0045	0.00718644
TARIM-I 16	40340	71.1	1107	0.6033	0.0129	0.02938	30.0029	0.994071	0.0656	0.0062	0.0189189
TARIM-I 17	57470	88.2	1518	0.86	0.0165	0.0399	31.06	0.968508	0.0581	0.0057	0.00965644
TARIM-I 18	65060	100.3	1701	0.975	0.0204	0.045	31.255	0.92186	0.0595	0.0052	0.0113854
TARIM-I 19	84000	237	2306	1.262	0.031	0.0657	29.8232	0.982202	0.085	0.014	0.0428778
TARIM-I 20	91800	124.7	2403	1.382	0.0327	0.0628	31.3632	0.70113	0.0524	0.0034	0.00261696
TARIM-I 21	70230	96.9	1837	1.06	0.0352	0.0487	31.2844	0.894121	0.0527	0.0044	0.00298746
TARIM-I 22	76150	111.5	1987	1.154	0.0314	0.0529	31.0891	0.815071	0.0561	0.0046	0.00718644
TARIM-I 23	57430	85.7	1546	0.874	0.0338	0.0414	30.3318	0.905151	0.0564	0.0052	0.00755694
TARIM-I 24	62990	111	1670	0.964	0.0673	0.0458	30.8771	0.842277	0.067	0.014	0.0206479
TARIM-I 25	48240	78	1308	0.7436	0.0732	0.0357	30.1756	0.904993	0.0609	0.0054	0.0131144
TARIM-I 26	89600	120.8	2356	1.391	0.0479	0.0641	30.8963	0.766657	0.0518	0.0037	0.00187596
TARIM-I 27	97400	145	2609	1.522	0.0525	0.0718	30.3133	0.645749	0.0555	0.0036	0.00644545
TARIM-I 28	88100	126.7	2298	1.384	0.0684	0.0638	31.0504	0.80336	0.0555	0.0042	0.00644545
TARIM-I 29	63610	109	1749	1.004	0.1021	0.0495	29.4268	0.817168	0.0623	0.0056	0.0148434
TARIM-I 30	61920	93.1	1633	0.982	0.0859	0.0461	30.7058	0.795094	0.0565	0.005	0.00768044
TARIM-I 31	63910	94.4	1717	1.017	0.086	0.0485	30.1391	0.911923	0.0559	0.0044	0.00693944
TARIM-I 32	63050	104	1706	1.007	0.1122	0.049	30.203	0.90664	0.0616	0.0061	0.0139789
TARIM-I 33	48920	80.5	1326	0.784	0.0418	0.0377	30.0935	1.00009	0.0608	0.0059	0.0129909
TARIM-I 34	52120	79.6	1401	0.837	0.0486	0.03982	30.1208	0.801522	0.0563	0.0052	0.00743344
TARIM-I 35	54800	81.9	1458	0.882	0.0686	0.0415	30.668	0.934769	0.0568	0.0049	0.00805094
TARIM-I 36	57220	85.5	1580	0.923	0.0619	0.0453	29.4181	0.851438	0.0529	0.0045	0.00323446
TARIM-I 37	83400	119.3	2307	1.349	0.0495	0.0655	29.2625	0.71351	0.0529	0.0041	0.00323446
TARIM-I 38	79400	117.7	2109	1.288	0.0249	0.0608	30.341	0.748591	0.0562	0.0042	0.00730994
TARIM-I 39	61600	118	1675	1.003	0.0113	0.05	29.4965	0.803576	0.0694	0.0065	0.0236119
TARIM-I 40	79600	136	2119	1.299	0.013	0.0624	30.2489	0.78998	0.0635	0.0051	0.0163254
TARIM-I 41	59560	91.3	1610	0.974	0.011	0.047	29.8948	0.897204	0.0579	0.0047	0.00940944
TARIM-I 42	55680	82.8	1507	0.909	0.01049	0.0439	29.7342	0.887588	0.0552	0.005	0.00607495
TARIM-I 43	42590	65.6	1175	0.6924	0.0094	0.034	29.211	0.942291	0.0562	0.0058	0.00730994
TARIM-I 44	34540	55.9	932	0.5575	0.00613	0.02703	29.7342	1.06511	0.0623	0.0069	0.0148434
TARIM-I 45	35770	63.8	976	0.5718	0.00522	0.0279	29.3834	1.1268	0.0666	0.0091	0.0201539
Session 1 2022-10-16 LD-5 67 μm 10 Hz 3 J·cm-2
LD-5 01	22970	116	390	0.4557	0.0547	0.0199	51.1037	20.0502	0.42	0.17	0.456602
LD-5 02	23620	29	270	0.489	0.0492	0.012	74.1713	5.66586	0.143	0.073	0.114508
LD-5 03	23380	36	278	0.486	0.0468	0.0129	71.6823	6.73525	0.179	0.075	0.158967
LD-5 04	23870	43	281	0.498	0.0506	0.0145	72.6576	6.4255	0.145	0.058	0.116978
LD-5 05	25050	34.6	295	0.525	0.0543	0.0139	72.1667	6.82658	0.132	0.037	0.100923
LD-5 06	26800	37	286	0.563	0.0599	0.0132	79.7065	5.94824	0.14	0.048	0.110803
LD-5 07	29170	49	314	0.615	0.067	0.0153	78.8241	5.7591	0.158	0.061	0.133033
LD-5 08	30420	44	322	0.643	0.0728	0.0146	82.4125	5.6595	0.122	0.044	0.0885727
LD-5 09	30310	63	323	0.642	0.0736	0.0162	79.2922	5.59225	0.224	0.067	0.214542
LD-5 10	28270	36	304	0.6	0.0659	0.0148	78.7079	4.75612	0.123	0.048	0.0898077
LD-5 11	25170	36	290	0.535	0.0576	0.0131	72.1667	6.82658	0.125	0.037	0.0922777
LD-5 12	24000	42.2	265	0.4787	0.0599	0.0129	77.8474	5.10661	0.182	0.049	0.162672
LD-5 13	22720	46	263	0.484	0.0502	0.0155	71.6823	7.69743	0.156	0.073	0.130563
LD-5 14	21970	34	248	0.469	0.0475	0.01124	74.1713	6.69602	0.163	0.057	0.139208
LD-5 15	23440	46	240	0.5005	0.0514	0.0122	81.5318	7.46856	0.21	0.11	0.197252
LD-5 16	23700	44	236	0.5065	0.0545	0.0131	84.0997	7.94643	0.188	0.087	0.170082
LD-5 17	24660	20.5	248	0.5272	0.0542	0.0109	83.0534	5.48953	0.098	0.035	0.0589328
LD-5 18	24950	30	240	0.5334	0.051	0.0121	84.0997	7.94643	0.156	0.059	0.130563
LD-5 19	24390	22	221	0.521	0.0505	0.0107	93.69	8.21842	0.162	0.096	0.137973
LD-5 20	23170	15.3	254	0.495	0.0479	0.0121	77.9042	5.62547	0.072	0.039	0.0268229
LD-5 21	23010	54	261	0.492	0.0483	0.0137	73.6598	5.58798	0.246	0.09	0.241712
LD-5 22	25260	36	272	0.539	0.0542	0.0159	76.2905	6.53918	0.135	0.062	0.104628
LD-5 23	24610	36.2	251	0.4932	0.0597	0.0111	85.4453	6.83563	0.159	0.04	0.134268
LD-5 24	27900	29	291	0.596	0.0624	0.0138	79.116	5.74324	0.153	0.075	0.126858
LD-5 25	29170	54	334	0.623	0.0656	0.0178	72.1667	5.36374	0.169	0.051	0.146618
LD-5 26	29730	31	314	0.635	0.0693	0.0151	78.5343	6.35204	0.154	0.083	0.128093
LD-5 27	29970	34	305	0.64	0.0704	0.0146	82.2856	6.21262	0.118	0.046	0.0836327
LD-5 28	29950	36	322	0.64	0.068	0.0149	76.8393	6.63361	0.138	0.048	0.108333
LD-5 29	30560	34	301	0.653	0.0675	0.0147	84.166	5.23965	0.133	0.049	0.102158
LD-5 30	31520	29	341	0.674	0.0744	0.0148	76.7841	5.24406	0.093	0.037	0.0527578
LD-5 31	33670	27.4	334	0.72	0.0806	0.0143	82.4125	5.78668	0.074	0.019	0.0292929
LD-5 32	35340	49	347	0.757	0.0856	0.0171	84.7	5.57502	0.16	0.044	0.135503
LD-5 33	34740	31	348	0.744	0.0894	0.0163	82.9889	5.15859	0.086	0.031	0.0441128
LD-5 34	25260	41.1	294	0.509	0.0598	0.01288	75.6421	4.87495	0.15	0.028	0.123153
LD-5 35	32970	37	311	0.7067	0.0783	0.01367	88.4161	5.92856	0.156	0.049	0.130563
LD-5 36	25550	60	273	0.5174	0.0634	0.014	82.159	7.5839	0.22	0.1	0.209602
LD-5 37	26440	42	284	0.538	0.0595	0.0127	80.9755	5.58663	0.146	0.044	0.118213
LD-5 38	25700	31	302	0.526	0.0577	0.0144	74.1713	7.72617	0.091	0.033	0.0502878
LD-5 39	24240	42	279	0.498	0.0531	0.0128	74.1713	5.66586	0.151	0.038	0.124388
LD-5 40	23370	43	280	0.482	0.0442	0.0137	71.2044	5.69635	0.15	0.044	0.123153
Session 2 2022-10-28 LD-5 100 μm 15 Hz 3 J·cm-2
LD-5 01	83250	57.9	740	0.4848	0.0354	0.00843	84.0713	3.52093	0.0767	0.0077	0.0326274
LD-5 02	97300	56.9	846	0.5824	0.0415	0.00966	87.6679	3.20355	0.0687	0.0069	0.0227474
LD-5 03	100400	57.2	910	0.602	0.043	0.01033	84.4321	3.26133	0.0652	0.007	0.0184249
LD-5 04	81900	49.1	734	0.4912	0.0362	0.0085	84.8692	3.58808	0.0678	0.0072	0.0216359
LD-5 05	101600	49.3	907	0.6106	0.0459	0.01019	85.0159	3.38006	0.0579	0.0068	0.00940944
LD-5 06	103600	55.1	914	0.623	0.0471	0.01034	85.8319	3.14567	0.0603	0.0055	0.0123734
LD-5 07	106500	71.5	961	0.6406	0.0467	0.01132	84.796	2.9971	0.0749	0.0067	0.0304044
LD-5 08	105200	60.4	944	0.633	0.0481	0.01075	84.9425	3.00746	0.0644	0.0066	0.0174369
LD-5 09	106600	59.3	947	0.6418	0.0463	0.01089	85.6078	3.20377	0.0636	0.0065	0.0164489
LD-5 10	107000	56.7	932	0.6447	0.0486	0.01069	87.4341	3.03105	0.0619	0.0064	0.0143494
LD-5 11	109700	59.7	977	0.6606	0.0495	0.01114	85.982	3.23184	0.0626	0.0064	0.0152139
LD-5 12	84360	66.1	727	0.4932	0.0356	0.00849	87.8245	3.99915	0.0929	0.0097	0.0526343
LD-5 13	110500	59.8	976	0.666	0.0492	0.01109	85.8319	3.07078	0.0643	0.0066	0.0173134
LD-5 14	112500	58.3	998	0.678	0.0502	0.01133	85.3849	3.26123	0.0612	0.0067	0.0134849
LD-5 15	113000	66	991	0.6811	0.0511	0.01144	85.6824	3.35863	0.0684	0.0067	0.0223769
LD-5 16	110700	58.9	978	0.667	0.0508	0.01118	85.5334	3.49571	0.0622	0.0061	0.0147199
LD-5 17	109300	55.1	960	0.659	0.0501	0.01096	86.3594	3.41192	0.0582	0.0055	0.00977994
LD-5 18	102900	50	925	0.621	0.0467	0.01049	84.0713	3.0898	0.0542	0.0062	0.00483995
LD-5 19	98900	58.7	889	0.597	0.0431	0.01032	83.7848	2.99741	0.0669	0.0072	0.0205244
LD-5 20	99790	50.7	877	0.603	0.0432	0.01016	85.4591	3.34115	0.0605	0.0064	0.0126204
LD-5 21	103000	57.8	912	0.623	0.0441	0.01063	83.4295	3.2551	0.0648	0.0068	0.0179309
LD-5 22	107200	55.6	930	0.649	0.0479	0.01095	86.7402	3.36558	0.0617	0.0067	0.0141024
LD-5 23	81200	56.5	759	0.4763	0.0342	0.00869	82.3814	3.5188	0.0767	0.0079	0.0326274
LD-5 24	115400	79.1	1063	0.699	0.051	0.01285	80.6919	2.91259	0.0742	0.0066	0.0295399
LD-5 25	122700	74	1075	0.744	0.0551	0.01276	85.5334	3.1982	0.0689	0.0064	0.0229944
LD-5 26	123800	72.7	1116	0.752	0.0565	0.01322	82.7278	3.06142	0.0674	0.0061	0.0211419
LD-5 27	135500	78.7	1178	0.823	0.0607	0.01375	86.8935	3.07044	0.0684	0.0063	0.0223769
LD-5 28	156000	75.8	1338	0.949	0.0726	0.01544	88.6157	2.87402	0.0567	0.0047	0.00792744
LD-5 29	171700	89.9	1500	1.046	0.0816	0.01722	87.2016	3.01495	0.0616	0.005	0.0139789
LD-5 30	183500	83	1577	1.12	0.0914	0.018	88.4563	2.62505	0.0536	0.0045	0.00409895
LD-5 31	191700	89.3	1623	1.172	0.0964	0.01868	89.5841	2.69242	0.0544	0.0043	0.00508695
LD-5 32	194700	87.5	1697	1.193	0.1001	0.01959	86.7402	2.67717	0.0524	0.0046	0.00261696
LD-5 33	193800	93.4	1658	1.189	0.1029	0.01945	87.9029	2.74942	0.0574	0.0043	0.00879194
LD-5 34	80300	57.7	728	0.4729	0.0323	0.00839	83.7135	3.63352	0.0794	0.009	0.0359619
LD-5 35	188900	117.6	1659	1.161	0.0988	0.01991	86.7402	2.90664	0.072	0.0048	0.0268229
LD-5 36	176500	89.6	1513	1.086	0.0923	0.01773	87.9029	2.90653	0.0603	0.0049	0.0123734
LD-5 37	81900	52.5	755	0.4844	0.035	0.00858	82.9371	3.56644	0.0741	0.0085	0.0294164
LD-5 38	84200	53.8	757	0.4994	0.0358	0.00869	84.4321	3.69617	0.0737	0.0078	0.0289224
LD-5 39	92600	59	851	0.55	0.0389	0.00991	82.1063	3.28974	0.0712	0.0082	0.0258349
LD-5 40	92100	56.5	830	0.549	0.0404	0.00971	83.2882	3.45565	0.0699	0.0064	0.0242294
LD-5 41	95300	55.1	865	0.569	0.0417	0.00986	84.723	2.84599	0.0647	0.007	0.0178074
Session 3 2022-11-03 LD-5 100 μm 15 Hz 3 J·cm-2
LD-5 01	136000	70.2	1229	0.762	0.0543	0.01258	84.2551	2.84744	0.0581	0.0061	0.00965644
LD-5 02	190760	85.7	1736	1.0855	0.0864	0.01783	84.6954	2.87728	0.049	0.0044	-0.00158203
LD-5 03	178430	86.5	1576	1.0158	0.0787	0.01641	86.8128	2.79041	0.0556	0.005	0.00656895
LD-5 04	167450	78.1	1509	0.955	0.0733	0.01541	85.8925	3.11095	0.0527	0.0042	0.00298746
LD-5 05	157500	69.1	1396	0.9004	0.0688	0.01417	88.071	2.95165	0.0493	0.0046	-0.00121153
LD-5 06	145300	74.6	1311	0.8329	0.0618	0.01372	85.7411	3.1756	0.0575	0.0055	0.00891544
LD-5 07	133300	61.1	1230	0.7664	0.0539	0.01289	83.3165	2.92714	0.051	0.0048	0.000887962
LD-5 08	127800	61.7	1136	0.736	0.0529	0.01184	86.5039	3.23235	0.0565	0.006	0.00768044
LD-5 09	125900	60	1098	0.7254	0.0523	0.01144	88.9573	3.17414	0.0544	0.0049	0.00508695
LD-5 10	125300	61.9	1085	0.7223	0.0515	0.0114	88.311	3.2886	0.0566	0.0059	0.00780394
LD-5 11	117860	53.8	1014	0.6806	0.0489	0.01075	89.1204	3.34916	0.0543	0.0059	0.00496345
LD-5 12	166300	80.3	1496	0.938	0.0691	0.01517	86.6581	2.85771	0.0548	0.0048	0.00558095
LD-5 13	109410	51.2	973	0.6327	0.0446	0.01018	87.2804	3.76074	0.0532	0.0053	0.00360495
LD-5 14	101900	55.7	904	0.5891	0.0397	0.00953	87.2804	3.68239	0.0646	0.0067	0.0176839
LD-5 15	96600	49.6	871	0.559	0.0376	0.00923	85.1404	3.57858	0.0577	0.0072	0.00916244
LD-5 16	97300	50.9	878	0.563	0.0375	0.00937	85.8167	3.63566	0.0591	0.0071	0.0108914
LD-5 17	102200	46.5	902	0.5921	0.0404	0.0094	87.2804	3.36899	0.0533	0.0064	0.00372845
LD-5 18	105400	47.4	947	0.6127	0.0427	0.00984	86.0446	3.5027	0.0519	0.0053	0.00199946
LD-5 19	108600	46.6	954	0.6321	0.0434	0.01016	87.6739	3.63661	0.0493	0.0057	-0.00121153
LD-5 20	109800	54	968	0.6392	0.0432	0.0103	86.2736	3.13861	0.0565	0.0054	0.00768044
LD-5 21	109900	47.4	940	0.6407	0.043	0.00995	89.6132	3.55149	0.0514	0.0058	0.00138196
LD-5 22	106500	50.7	911	0.6221	0.0437	0.00979	90.1951	3.93244	0.0586	0.0067	0.0102739
LD-5 23	174100	81.2	1616	0.986	0.0728	0.01642	83.388	2.86065	0.0514	0.0047	0.00138196
LD-5 24	105100	43.4	927	0.6146	0.0421	0.00985	87.2021	3.8322	0.0473	0.0055	-0.00368152
LD-5 25	104400	53.7	917	0.6107	0.0413	0.00981	87.4374	3.61701	0.0611	0.0071	0.0133614
LD-5 26	104900	57.7	934	0.6136	0.0395	0.01	86.8128	3.33299	0.0636	0.0071	0.0164489
LD-5 27	104600	51.9	928	0.6135	0.0414	0.01008	86.5809	3.31521	0.057	0.0065	0.00829794
LD-5 28	105900	53.8	932	0.622	0.0407	0.01015	85.9685	3.4205	0.0605	0.0073	0.0126204
LD-5 29	107500	47.4	928	0.631	0.0415	0.01005	88.5522	3.46789	0.052	0.0059	0.00212296
LD-5 30	111600	78.8	961	0.653	0.0425	0.01085	88.311	3.60944	0.0857	0.0082	0.0437423
LD-5 31	111800	57.3	941	0.654	0.0456	0.01021	89.8617	3.73732	0.0635	0.0072	0.0163254
LD-5 32	116200	50.8	1031	0.681	0.0501	0.0112	85.5148	3.53491	0.0507	0.0061	0.000517463
LD-5 33	123500	56	1059	0.7264	0.0546	0.01152	88.5522	3.22595	0.0543	0.0058	0.00496345
LD-5 34	183200	90.8	1646	1.04	0.078	0.0168	86.5039	2.92451	0.0563	0.0049	0.00743344
LD-5 35	129000	63.6	1111	0.7621	0.0631	0.01223	88.2308	3.12251	0.0587	0.0058	0.0103974
LD-5 36	131900	68.4	1154	0.7818	0.0623	0.01279	86.8904	3.02835	0.0603	0.0065	0.0123734
LD-5 37	128200	54.1	1116	0.7602	0.0612	0.0124	86.427	3.07296	0.0494	0.0053	-0.00108803
LD-5 38	127200	64.8	1153	0.7517	0.0565	0.01283	83.7471	3.10174	0.0581	0.0059	0.00965644
LD-5 39	123100	64.2	1085	0.726	0.0504	0.01188	86.5039	3.23235	0.0609	0.0064	0.0131144
LD-5 40	125900	69	1122	0.744	0.0519	0.0124	84.1093	2.98312	0.0618	0.0067	0.0142259
LD-5 41	196800	94.5	1798	1.119	0.0859	0.01839	85.3647	2.84799	0.0532	0.0039	0.00360495
LD-5 42	206500	99.5	1801	1.173	0.091	0.01845	88.5522	2.74205	0.0558	0.004	0.00681594
LD-5 43	213700	97	1917	1.215	0.0966	0.01954	86.9681	2.8004	0.0517	0.0046	0.00175246
LD-5 44	211900	91.4	1855	1.206	0.0958	0.01911	88.633	2.90865	0.0502	0.0046	-0.000100035
LD-5 45	204440	92.6	1795	1.1635	0.0916	0.01856	87.5949	2.84092	0.0528	0.0049	0.00311096
Session 4 2022-11-09 LD-5 120 μm 15 Hz 3 J·cm-2
LD-5 01	199700	98.6	1523	0.5272	0.0518	0.00755	86.5797	2.48639	0.0667	0.0056	0.0202774
LD-5 02	232800	108.5	1772	0.6463	0.0709	0.00924	87.026	2.60181	0.0617	0.005	0.0141024
LD-5 03	231400	101.1	1779	0.6475	0.0714	0.00933	85.3541	2.24389	0.0585	0.0047	0.0101504
LD-5 04	236900	100.5	1825	0.6716	0.0762	0.00956	86.138	2.28529	0.0561	0.0046	0.00718644
LD-5 05	243500	113.6	1879	0.6966	0.0779	0.00999	85.9625	2.45107	0.0615	0.0042	0.0138554
LD-5 06	238900	104.8	1826	0.6815	0.0788	0.00979	85.7007	2.34916	0.0579	0.0042	0.00940944
LD-5 07	238600	108.8	1838	0.6761	0.0781	0.00983	84.9247	2.22137	0.059	0.0042	0.0107679
LD-5 08	234500	115.9	1863	0.6648	0.0768	0.00994	83.4142	2.14305	0.0623	0.0044	0.0148434
LD-5 09	231100	110.1	1790	0.6597	0.076	0.0096	85.527	2.16634	0.0611	0.0041	0.0133614
LD-5 10	224600	102.7	1753	0.6427	0.0735	0.00931	84.6692	2.29295	0.0592	0.0043	0.0110149
LD-5 11	217800	88	1707	0.6244	0.0727	0.00906	84.4152	2.36363	0.054	0.0046	0.00459295
LD-5 12	203700	85.7	1564	0.5461	0.0547	0.00786	85.7007	2.52317	0.0548	0.0046	0.00558095
LD-5 13	213400	89.6	1654	0.615	0.0719	0.00883	85.2679	2.0671	0.0542	0.004	0.00483995
LD-5 14	211200	85.1	1610	0.6115	0.0721	0.00866	86.4024	2.56466	0.0543	0.0047	0.00496345
LD-5 15	207900	94.9	1632	0.6018	0.0699	0.00874	84.4997	2.45294	0.0596	0.0051	0.0115089
LD-5 16	204500	97.4	1593	0.5895	0.0674	0.00855	84.6692	2.20802	0.0617	0.0058	0.0141024
LD-5 17	199200	88.4	1549	0.5753	0.0645	0.00829	85.3541	2.15759	0.0577	0.0047	0.00916244
LD-5 18	182200	81.1	1436	0.5381	0.0612	0.00784	83.9117	2.58575	0.0581	0.0046	0.00965644
LD-5 19	180300	135.4	1461	0.5308	0.0588	0.00854	82.276	2.48592	0.0949	0.007	0.0551043
LD-5 20	176100	104.9	1402	0.5196	0.0565	0.00791	83.3319	2.38561	0.076	0.0064	0.0317629
LD-5 21	215300	98	1648	0.5809	0.0575	0.00825	87.1158	2.42738	0.0594	0.0051	0.0112619
LD-5 22	197100	91.7	1534	0.5858	0.0663	0.00844	85.0103	2.14024	0.0613	0.0061	0.0136084
LD-5 23	198500	95.8	1520	0.5929	0.0657	0.00853	86.2259	2.46612	0.0649	0.0053	0.0180544
LD-5 24	194800	142.2	1532	0.5814	0.0648	0.00914	84.1627	2.2656	0.0941	0.0063	0.0541163
LD-5 25	190100	93.4	1430	0.5676	0.064	0.00807	87.7497	2.82769	0.0664	0.0057	0.0199069
LD-5 26	181800	80.6	1408	0.544	0.0615	0.00793	85.2679	2.75613	0.0602	0.0054	0.0122499
LD-5 27	181500	80.1	1378	0.5472	0.0606	0.00775	87.296	2.61798	0.0602	0.0055	0.0122499
LD-5 28	211700	92.9	1634	0.581	0.0603	0.00832	85.8751	2.35873	0.0575	0.0045	0.00891544
LD-5 29	215100	104.2	1605	0.599	0.0622	0.00838	88.4855	2.41156	0.0662	0.0053	0.0196599
LD-5 30	222300	101.7	1707	0.6263	0.0646	0.00903	86.0502	2.36835	0.0592	0.0041	0.0110149
LD-5 31	221400	145.2	1707	0.6298	0.0671	0.00951	85.7007	2.26215	0.0858	0.0059	0.0438658
LD-5 32	224500	101.7	1726	0.6336	0.0675	0.00916	86.0502	2.28064	0.0609	0.0052	0.0131144
LD-5 33	227800	106.7	1744	0.6338	0.0729	0.00906	87.1158	2.24757	0.0618	0.0047	0.0142259
Session 5 2022-11-14 LD-5 67 μm 15 Hz 3 J·cm-2
LD-5 01	56800	55	569	0.828	0.0522	0.0158	82.322	4.35422	0.106	0.021	0.0688128
LD-5 02	52010	44.1	523	0.7725	0.0475	0.01452	82.9389	3.17668	0.086	0.014	0.0441128
LD-5 03	55620	35.2	547	0.828	0.0461	0.01479	84.3434	3.99935	0.07	0.013	0.0243529
LD-5 04	53030	30.2	526	0.7906	0.0474	0.01394	83.008	3.73536	0.0611	0.0093	0.0133614
LD-5 05	48780	29.5	464	0.728	0.0467	0.01228	86.2421	4.33077	0.064	0.01	0.0169429
LD-5 06	47000	32.1	453	0.702	0.0473	0.01239	85.4284	4.68904	0.074	0.012	0.0292929
LD-5 07	47100	34.3	442	0.704	0.0472	0.0127	87.6845	4.55404	0.09	0.015	0.0490528
LD-5 08	46300	35.1	468	0.693	0.0472	0.0128	81.9158	4.31136	0.081	0.013	0.0379379
LD-5 09	51200	38.9	525	0.766	0.0497	0.01482	79.8154	3.70937	0.077	0.011	0.0329979
LD-5 10	52000	43.9	539	0.78	0.0519	0.0152	78.5564	4.02695	0.082	0.011	0.0391728
LD-5 11	53120	41.6	511	0.797	0.0517	0.01419	85.7225	3.98366	0.084	0.012	0.0416428
LD-5 12	57900	34.5	556	0.843	0.0556	0.01439	85.1364	3.85661	0.0638	0.0081	0.0166959
LD-5 13	52960	44.5	507	0.797	0.051	0.0141	85.7964	4.13833	0.094	0.014	0.0539928
LD-5 14	50380	34.2	480	0.7604	0.0459	0.01329	86.1674	4.09966	0.078	0.011	0.0342329
LD-5 15	49420	41	500	0.7487	0.0426	0.01402	80.9176	3.54959	0.083	0.018	0.0404078
LD-5 16	50430	32.8	489	0.7675	0.0464	0.01363	84.8463	3.7581	0.0703	0.0096	0.0247234
LD-5 17	54780	38.4	540	0.838	0.0544	0.01489	83.0772	3.88017	0.074	0.011	0.0292929
LD-5 18	60700	37.7	579	0.935	0.0617	0.01609	85.1364	3.63831	0.0664	0.0093	0.0199069
LD-5 19	64600	40.1	620	1.001	0.0661	0.01743	84.5582	3.58906	0.0664	0.0095	0.0199069
LD-5 20	68100	37.5	646	1.069	0.0726	0.01825	85.5752	3.74943	0.0587	0.0076	0.0103974
LD-5 21	70000	43	657	1.105	0.0778	0.0187	86.1674	3.72697	0.0675	0.0079	0.0212654
LD-5 22	70270	40.2	634	1.114	0.0798	0.01822	89.6576	4.03499	0.07	0.0094	0.0243529
LD-5 23	67620	39.8	636	1.076	0.081	0.01822	86.617	3.61532	0.063	0.008	0.0157079
LD-5 24	61650	36.3	609	0.984	0.0743	0.01741	83.3553	3.62718	0.063	0.0084	0.0157079
LD-5 25	55790	35	541	0.8933	0.064	0.01561	84.4865	3.94127	0.069	0.01	0.0231179
LD-5 26	51030	30.8	482	0.8191	0.0558	0.01413	86.6924	4.67792	0.067	0.011	0.0206479
LD-5 27	48070	34.1	460	0.7732	0.0477	0.01352	84.8463	4.48081	0.079	0.012	0.0354679
LD-5 28	46710	34.3	457	0.7532	0.0438	0.01392	82.9389	4.55784	0.079	0.011	0.0354679
LD-5 29	40750	30.7	412	0.6589	0.0374	0.01252	80.1364	4.38397	0.078	0.012	0.0342329
LD-5 30	35580	26.5	362	0.577	0.0347	0.01079	79.9435	4.49121	0.072	0.013	0.0268229
LD-5 31	41670	29.5	407	0.678	0.0368	0.01232	82.4583	4.50517	0.08	0.012	0.0367029
LD-5 32	52680	30.5	514	0.767	0.0501	0.01321	83.8464	3.74062	0.0646	0.0091	0.0176839
LD-5 33	39690	27.7	381	0.648	0.0391	0.01152	83.2856	4.87457	0.079	0.012	0.0354679
LD-5 34	46540	33.7	467	0.7607	0.0484	0.01425	80.3303	3.82217	0.0748	0.0092	0.0302809
LD-5 35	47370	26.8	446	0.7737	0.0482	0.01322	85.9444	4.15262	0.064	0.01	0.0169429
LD-5 36	45880	27.7	437	0.746	0.0455	0.0131	85.2822	4.30792	0.0642	0.0094	0.0171899
LD-5 37	40800	26.7	383	0.659	0.0392	0.01149	85.1364	4.2932	0.074	0.012	0.0292929
LD-5 38	38920	29.2	376	0.623	0.0353	0.01134	83.8464	4.79929	0.079	0.013	0.0354679
LD-5 39	51390	45.9	513	0.75	0.0488	0.01388	83.008	3.80453	0.088	0.015	0.0465828
LD-5 40	51200	32.1	507	0.749	0.0465	0.01333	84.4865	3.86961	0.0668	0.0094	0.0204009
LD-5 41	51680	33.8	497	0.759	0.0475	0.01312	84.5582	4.30687	0.0688	0.0093	0.0228709
LD-5 42	52020	37.8	502	0.7677	0.0476	0.01346	84.8463	4.33627	0.0721	0.0099	0.0269464
LD-5 43	51520	33.3	495	0.7629	0.0466	0.01326	86.0186	4.08551	0.0699	0.0094	0.0242294

## Sheet: Table S6
Table S6 LA-MC-ICPMS U-Pb data of reference carbonate as unknows with Tarim as standard
Sample	Intensity			Concentration (μg·g-1)			Isotope ratios
	238U (V)	207Pb (CPS)	206Pb (CPS)	U	Th	Pb	238U/206Pb	2σ	207Pb/206Pb	2σ
WC-1 90 μm 10 Hz 3 J·cm-2
WC-1 01	0.02737	8310	71700	2.914	0.0007	0.04	20.775	0.451434	0.10648	0.00087875
WC-1 02	0.03608	7370	83500	3.842	-0.0013	0.02518	23.5713	0.399632	0.08106	0.000608099
WC-1 03	0.02875	6267	67500	3.062	-0.0004	0.02284	23.0577	0.401964	0.08514	0.000677221
WC-1 04	0.0291	7080	70900	3.1	0.0003	0.02896	22.2133	0.407567	0.0931	0.00123643
WC-1 05	0.03345	6930	73610	3.564	0.0014	0.02587	24.7267	0.452266	0.08599	0.000789505
WC-1 06	0.03882	8668	91870	4.192	0.0009	0.03409	22.7561	0.35408	0.08687	0.000537471
WC-1 07	0.03979	8270	88700	4.302	-0.0006	0.03222	24.1874	0.399401	0.08582	0.000742643
WC-1 08	0.03006	7670	73700	3.254	-0.0023	0.03451	21.8348	0.391933	0.09567	0.000709453
WC-1 09	0.04013	7380	90300	4.351	0.001	0.02251	23.8706	0.378324	0.07534	0.000655914
WC-1 10	0.03052	7228	71600	3.314	0	0.03078	22.89	0.383746	0.09314	0.000835005
WC-1 11	0.03867	8274	86250	4.352	0.0038	0.03639	23.9988	0.375366	0.08847	0.000609711
WC-1 12	0.04229	8108	90540	4.769	-0.0035	0.03166	24.9235	0.448417	0.08244	0.000701495
WC-1 13	0.04253	8610	86900	4.807	-0.0019	0.04048	26.1603	0.523986	0.09146	0.000685607
WC-1 14	0.0386	7109	85090	4.373	0.0012	0.02457	24.1373	0.384579	0.07665	0.000556922
WC-1 15	0.02819	6230	61570	3.201	-0.0003	0.02959	24.3749	0.39357	0.09323	0.000788609
WC-1 16	0.03755	8918	85890	4.427	0.003	0.04448	23.1544	0.384996	0.09607	0.000719034
WC-1 17	0.02808	8310	69700	3.317	-0.0003	0.04813	21.433	0.358756	0.11028	0.000792865
WC-1 18	0.03519	8620	80620	4.163	-0.0008	0.0442	23.1078	0.363089	0.0987	0.00114445
WC-1 19	0.04063	8020	86060	4.814	0.0003	0.03487	24.9654	0.423273	0.08587	0.000544432
WC-1 20	0.03626	7042	80990	4.302	-0.0002	0.02732	23.6331	0.374531	0.08017	0.000526702
WC-1 21	0.02784	8340	67200	3.357	0.0017	0.05116	21.6799	0.352311	0.1154	0.00116033
WC-1 22	0.03796	8960	85500	4.579	-0.0051	0.047	23.293	0.585131	0.0962	0.00241966
WC-1 23	0.02692	9350	69000	3.248	0.0021	0.0598	20.5048	0.920848	0.1257	0.00263093
WC-1 24	0.04029	9138	86710	4.863	0.0017	0.04824	24.3295	0.396166	0.09747	0.000649757
WC-1 25	0.02842	7160	61200	3.432	0.0009	0.0417	24.4518	0.460878	0.10777	0.000898794
WC-1 26	0.02195	9220	56120	2.669	0.0018	0.0683	20.3499	0.337535	0.1518	0.00148188
WC-1 27	0.0315	9410	70360	3.832	0.0016	0.06154	23.2883	0.416226	0.12376	0.000761145
WC-1 28	0.02889	8900	64000	3.52	0.0034	0.05973	22.8807	0.468868	0.1286	0.00155543
WC-1 29	0.02283	6430	54000	2.783	0.0005	0.03809	21.7941	0.378947	0.11016	0.00104147
WC-1 30	0.0374	7150	77600	4.563	-0.0001	0.03145	25.0842	0.458079	0.08477	0.000631256
WC-1 31	0.02909	9640	69200	3.647	0	0.0669	21.6601	0.356766	0.13	0.00127006
WC-1 32	0.03253	12120	75330	4.084	0.0041	0.09214	22.1749	0.366237	0.14858	0.00097394
WC-1 33	0.02515	9220	56780	3.163	-0.0002	0.0694	22.8003	0.371545	0.15012	0.000985073
WC-1 34	0.029	7189	64960	3.652	-0.002	0.04117	22.9261	0.392459	0.10198	0.00101395
WC-1 35	0.03576	6871	75150	4.51	-0.0005	0.03083	24.3703	0.417845	0.08433	0.000713037
WC-1 36	0.03083	9535	70490	3.955	-0.0022	0.06773	22.3286	0.357337	0.12546	0.000967254
WC-1 37	0.02404	9737	58670	3.084	0.0004	0.07812	20.9695	0.339348	0.15335	0.001096
WC-1 38	0.04095	8830	79100	5.253	0.0024	0.05315	26.3735	0.466589	0.10299	0.000641183
WC-1 39	0.03378	8400	69820	4.333	-0.0004	0.0549	24.4471	0.506088	0.11065	0.0010326
WC-1 40	0.03726	7527	75690	4.779	0.001	0.03985	25.0947	0.428164	0.09201	0.000632685
DuffBrown 90 μm 10 Hz 3 J·cm-2
DuffBrown 01	0.1338	42800	126100	14.3	0.0512	0.3593	57.4847	0.984774	0.314	0.00402736
DuffBrown 02	0.0791	45200	100800	8.46	0.0311	0.3963	42.2127	0.797735	0.4134	0.00364829
DuffBrown 03	0.1328	43500	127000	14.2	0.0361	0.369	56.6182	1.102	0.3156	0.00539536
DuffBrown 04	0.1198	29280	100700	12.82	0.0293	0.2414	63.6422	1.37251	0.2742	0.00497794
DuffBrown 05	0.0869	27590	81300	9.3	0.0158	0.2349	57.3438	1.2556	0.3152	0.00628151
DuffBrown 06	0.1393	36570	117800	15.28	0.0507	0.3259	63.4338	1.04956	0.2884	0.00229384
DuffBrown 07	0.1111	66500	145400	12.22	0.0291	0.637	40.9654	1.06513	0.4249	0.0057627
DuffBrown 08	0.07472	74700	138600	8.23	0.0307	0.701	28.6154	1.74273	0.494	0.011113
DuffBrown 09	0.14785	36010	119500	16.315	0.0583	0.3244	66.4374	1.1073	0.2786	0.00419581
DuffBrown 10	0.1165	32360	102400	12.88	0.0337	0.2767	60.9764	1.01535	0.2957	0.0032412
DuffBrown 11	0.1187	36900	105900	13.66	0.0468	0.349	59.573	1.164	0.3213	0.00559528
DuffBrown 12	0.1376	31690	110000	15.87	0.0442	0.2932	66.5131	1.31201	0.2675	0.00379773
DuffBrown 13	0.146	35000	117600	16.87	0.0613	0.323	66.3244	1.13838	0.2746	0.00468318
DuffBrown 14	0.1345	48620	128800	15.58	0.0466	0.472	55.2754	1.16908	0.3502	0.00405781
DuffBrown 15	0.1121	27510	91600	13.01	0.0279	0.2584	64.9187	1.14401	0.2774	0.00439067
DuffBrown 16	0.142	31220	109800	16.97	0.0594	0.2987	68.1483	1.12507	0.2634	0.00172059
DuffBrown 17	0.1392	92900	187500	16.66	0.0478	0.962	38.8212	1.78227	0.442	0.0120831
DuffBrown 18	0.0932	243000	362000	11.163	0.0397	2.52	13.3562	0.955856	0.6013	0.00881263
DuffBrown 19	0.0999	40300	100600	11.98	0.0321	0.4114	51.5101	1.1013	0.3742	0.00417539
DuffBrown 20	0.1257	35110	107500	15.08	0.0476	0.3471	61.4911	1.21683	0.3038	0.00479949
DuffBrown 21	0.1137	32670	97800	13.74	0.0661	0.3262	60.6899	0.997564	0.309	0.00354087
DuffBrown 22	0.0795	27040	74840	9.61	0.0483	0.2756	55.4862	0.931723	0.3351	0.00328022
DuffBrown 23	0.112	31580	95900	13.54	0.0476	0.3174	60.8494	1.02635	0.3055	0.00259147
DuffBrown 24	0.1092	36900	100900	13.2	0.0513	0.375	56.0196	1.27082	0.3381	0.00501802
DuffBrown 25	0.0637	34860	76600	7.71	0.0655	0.3662	38.565	2.00352	0.428	0.0100934
DuffBrown 26	0.1341	27650	100400	16.49	0.0235	0.2713	68.1087	1.49242	0.2582	0.0061557
DuffBrown 27	0.12	32800	101600	14.78	0.0034	0.335	59.3598	1.81378	0.3049	0.00895332
DuffBrown 28	0.1302	26970	99330	16.061	0.0606	0.2642	67.7907	1.15081	0.251	0.00526167
DuffBrown 29	0.138	31560	107700	17.05	0.0653	0.3155	66.4374	1.1073	0.2701	0.0037023
DuffBrown 30	0.109	22700	82500	13.48	0.0422	0.2239	68.0679	1.12349	0.255	0.00244046
DuffBrown 31	0.0866	104800	172200	11.011	0.0276	1.213	25.8808	0.794817	0.5596	0.0054997
DuffBrown 32	0.0408	149000	206000	5.2	-0.0011	1.73	9.02836	0.71328	0.647	0.0121773
DuffBrown 33	0.1193	31030	96700	15.2	0.0758	0.3317	63.2451	0.994288	0.2965	0.00212373
DuffBrown 34	0.13	28220	98690	16.59	0.0753	0.2969	67.5438	1.05787	0.2646	0.0027344
DuffBrown 35	0.1137	23090	84590	14.52	0.0518	0.2411	68.861	1.08367	0.2544	0.00253431
DuffBrown 36	0.003311	287500	357300	0.4241	0.0022	3.319	0.470518	0.00795971	0.748	0.00293587
DuffBrown 37	0.0385	134900	187100	4.92	-0.0003	1.583	8.69177	0.789123	0.6539	0.00943496
DuffBrown 38	0.1259	31960	100800	16.07	0.0697	0.345	63.5036	1.051	0.2929	0.00401105
DuffBrown 39	0.1053	29680	88600	13.43	0.0543	0.3236	58.2907	1.44214	0.3181	0.00579018
DuffBrown 40	0.126	24540	91100	16.06	0.0455	0.2565	70.1852	1.12851	0.2492	0.0026241
JT 130 μm 10 Hz 3 J·cm-2
JT 01	0.01217	980	2560	1.305	0.0075	0.0059	264.693	51.2919	0.302	0.0160292
JT 02	0.011395	805	2166	1.2229	0.0053	0.00586	299.55	7.53966	0.319	0.0120433
JT 03	0.006794	1309	2234	0.73	0.0056	0.01062	172.285	7.84109	0.524	0.0141001
JT 04	0.007599	804	1733	0.8172	0.0048	0.00607	251.544	9.49664	0.387	0.015051
JT 05	0.00867	1130	2183	0.933	0.0073	0.00868	225.707	8.9912	0.452	0.0110947
JT 06	0.009511	371	1401	1.0544	0.004	0.00205	398.17	8.32563	0.1893	0.00772379
JT 07	0.011337	659	1993	1.26	0.0043	0.00458	323.874	7.24406	0.2696	0.00745012
JT 08	0.006489	1189	2128	0.7227	0.0058	0.00944	172.54	3.66242	0.5009	0.00953568
JT 09	0.009995	521	1700	1.1152	0.0066	0.00348	338.659	7.47174	0.241	0.00823619
JT 10	0.009183	1176	2282	1.0269	0.0072	0.00953	226.542	4.53584	0.4624	0.00754649
JT 11	0.00543	404	1025	0.632	0.0044	0.00335	313.583	7.99373	0.31	0.0120409
JT 12	0.006043	301	952	0.7051	0.0052	0.00197	376.057	9.16476	0.23	0.0110246
JT 13	0.009514	829	1921	1.1119	0.006	0.00701	275.918	6.40186	0.3769	0.0099732
JT 14	0.00963	747	1914	1.127	0.0076	0.00665	281.045	5.62719	0.3388	0.00876729
JT 15	0.009052	825	1825	1.062	0.0072	0.00744	277.099	5.38939	0.3979	0.00908962
JT 16	0.00734	723	1639	0.882	0.0097	0.00631	246.069	5.78915	0.392	0.00928512
JT 17	0.00813	664	1601	0.978	0.0044	0.00581	283.232	6.26074	0.354	0.0110582
JT 18	0.002794	563	976	0.3367	-0.0006	0.00487	166.141	4.75461	0.506	0.0160817
JT 19	0.007569	795	1752	0.9115	0.0057	0.0073	238.267	5.57657	0.4024	0.00958687
JT 20	0.009437	504	1471	1.137	0.0081	0.00397	356.817	7.24926	0.287	0.00964383
JT 21	0.009715	636	1852	1.1764	0.0046	0.005514	284.686	5.73148	0.2978	0.00716367
JT 22	0.003235	333	717	0.3924	0.0021	0.00261	263.495	7.18224	0.38	0.0150492
JT 23	0.006005	600	1333	0.7281	0.0046	0.00535	248.326	6.50223	0.392	0.0110713
JT 24	0.006924	871	1754	0.8397	0.0072	0.00859	214.484	4.73717	0.447	0.00891549
JT 25	0.00725	397	1194	0.88	0.0055	0.00315	340.541	8.05662	0.271	0.0120313
JT 26	0.010301	571	1767	1.2771	0.0087	0.00477	317.17	5.9821	0.2724	0.00705406
JT 27	0.00539	1196	2100	0.67	0.0067	0.01158	137.991	4.16338	0.511	0.0101328
JT 28	0.004904	428	1053	0.6104	0.0045	0.00355	261.601	6.29299	0.339	0.0130452
JT 29	0.004867	513	1065	0.6068	0.0023	0.00464	255.967	8.784	0.41	0.0150573
JT 30	0.00975	709	1837	1.217	0.0062	0.00635	286.789	5.65424	0.3352	0.00886513
JT 31	0.00978	867	2036	1.251	0.0033	0.00857	254.68	5.0774	0.38	0.0083886
JT 32	0.006097	877	1600	0.7807	0.0023	0.0091	201.845	9.2679	0.479	0.017069
JT 33	0.006662	772	1609	0.8536	0.002	0.00774	221.838	4.62737	0.4297	0.00930219
JT 34	0.00652	807	1568	0.8358	0.0033	0.00806	223.113	5.79715	0.461	0.0110985
JT 35	0.010868	543	1844	1.3935	0.0109	0.00479	313.668	6.15108	0.2529	0.00645096
JT 36	0.009223	930	1978	1.1752	0.005	0.01047	245.138	5.3723	0.4232	0.00929914
JT 37	0.005804	1772	2627	0.7392	0.004	0.01951	114.857	2.85993	0.624	0.0094142
JT 38	0.007024	1006	1840	0.893	0.0037	0.01044	200.215	4.10387	0.501	0.0111162
JT 39	0.00979	719	1747	1.244	0.0048	0.00725	296.801	6.72826	0.3591	0.00996647
JT 40	0.009984	999	2215	1.267	0.0132	0.01051	236.573	4.82629	0.4066	0.00820384
