# Supplementary figures and images for: TARIM calcite: a potential reference material for laser ICPMS in situ calcite U–Pb dating
Source: Royal Society of Chemistry journal article supplement (doi:10.1039/d3ja00222e), 2023-01-01

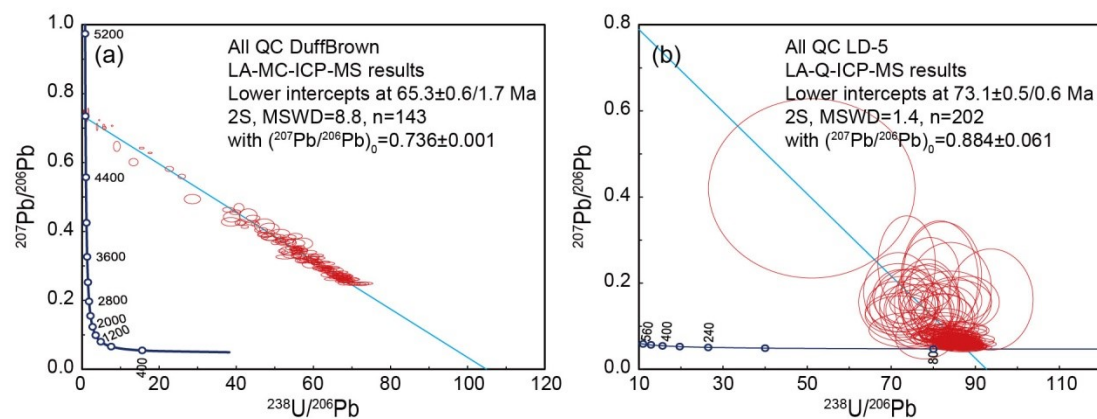

**Figure S1.** T-W diagram of (a) DuffBrown and (b) LD-5 quality control standards. Ellipses are 2S errors.

Supplement: d3ja00222e2.pdf [file d3ja00222e2.pdf]
